# Supplementary material for: Efficient assembly of mono- and bis(1,2,4-oxadiazol-3-yl)furoxan scaffolds via tandem reactions of furoxanylamidoximes
Source: Royal Society of Chemistry journal article supplement (doi:10.1039/c5ra07295f), 2015-01-01

Supporting information

**Efficient Assembly of Mono- and Bis(1,2,4-oxadiazol-3-yl)furoxan Scaffolds via Tandem Reactions of Furoxanylamidoximes**

Leonid L. Fershtat,<sup>a</sup> Ivan V. Ananyev,<sup>b</sup> Nina N. Makhova<sup>a\*</sup>

<sup>a</sup> N.D. Zelinsky Institute of Organic Chemistry, Leninsky prosp. 47, 119991 Moscow, Russian Federation. Fax: +7 499 135 53 28. E-mail: [nnn@ioc.ac.ru](mailto:nnn@ioc.ac.ru)

<sup>b</sup> A.N. Nesmeyanov Institute of Organoelement Compounds, Vavilova str. 28, 119991 Moscow, Russian Federation.

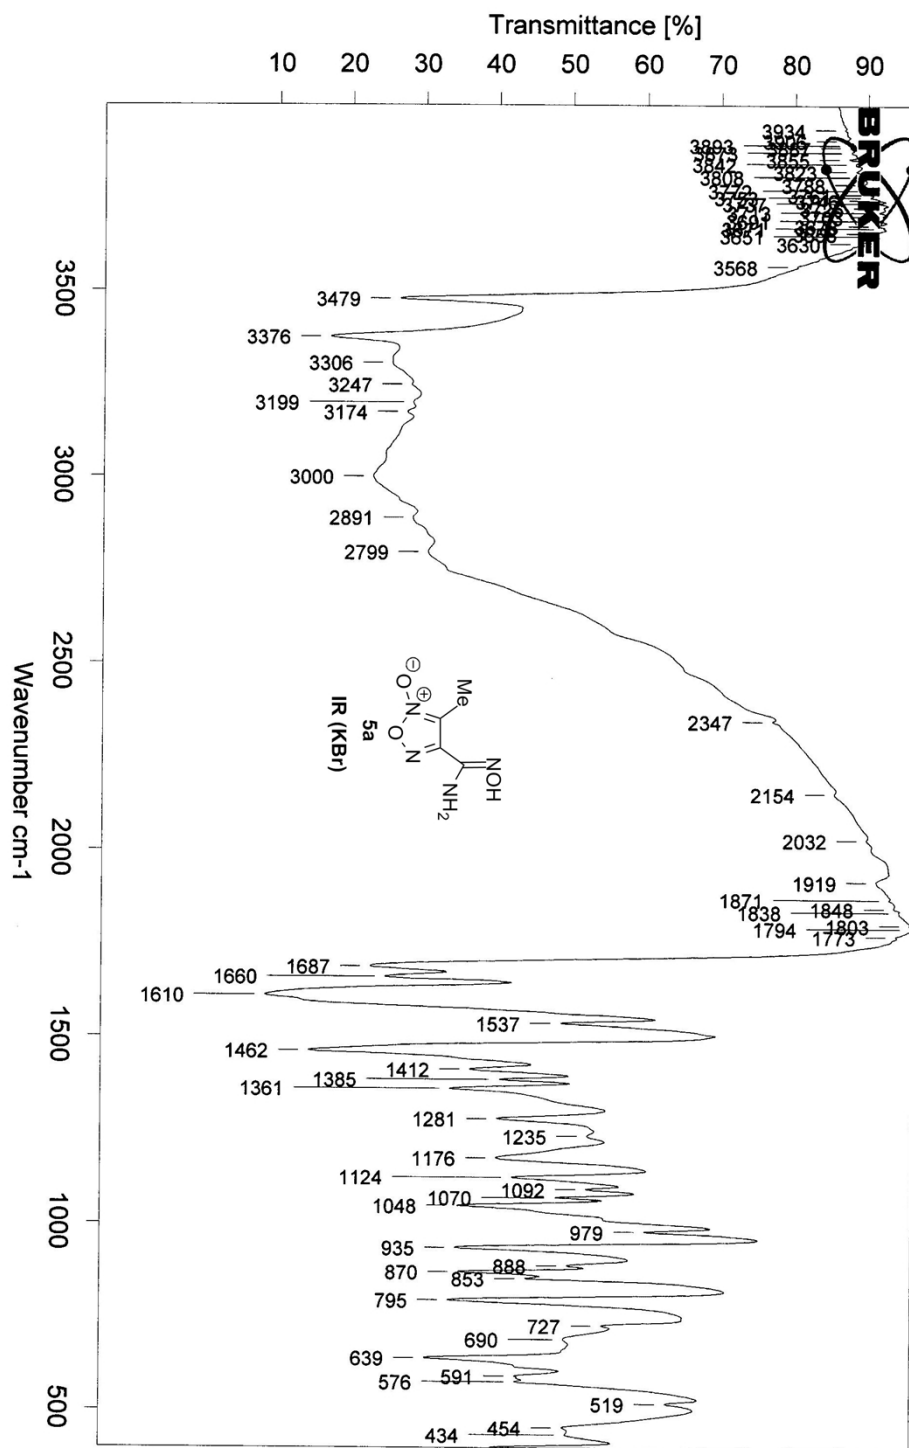

D:\EDL\LEO-638.0 ФЕРИТАТ. LEO-638, прессовка с KBr, 1/200.

03.12.2014

/USED 638

10.50

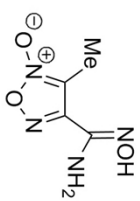

5a

<sup>1</sup>H NMR, 200 MHz, DMSO-d<sub>6</sub>

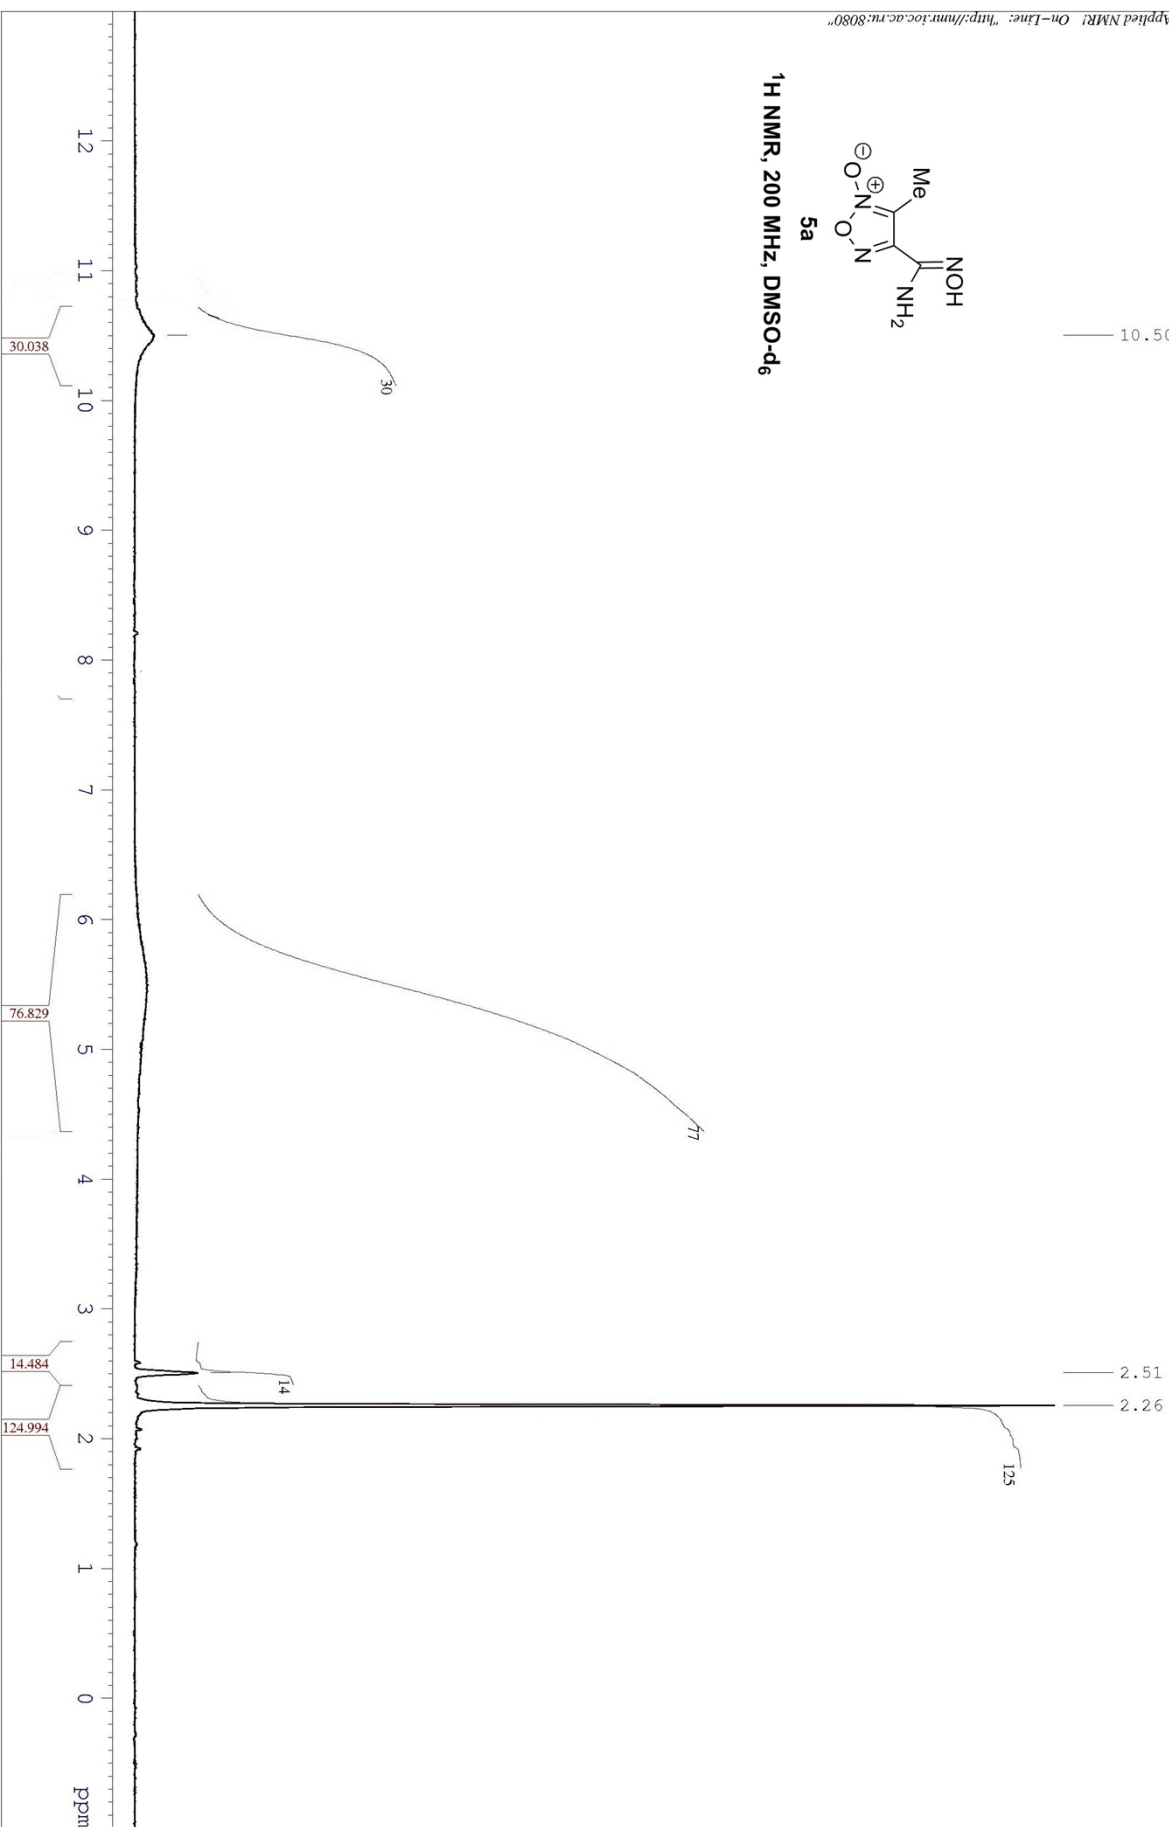

/USED 638

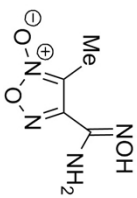

5a

<sup>13</sup>C NMR, 75.5 MHz, DMSO-d<sub>6</sub>

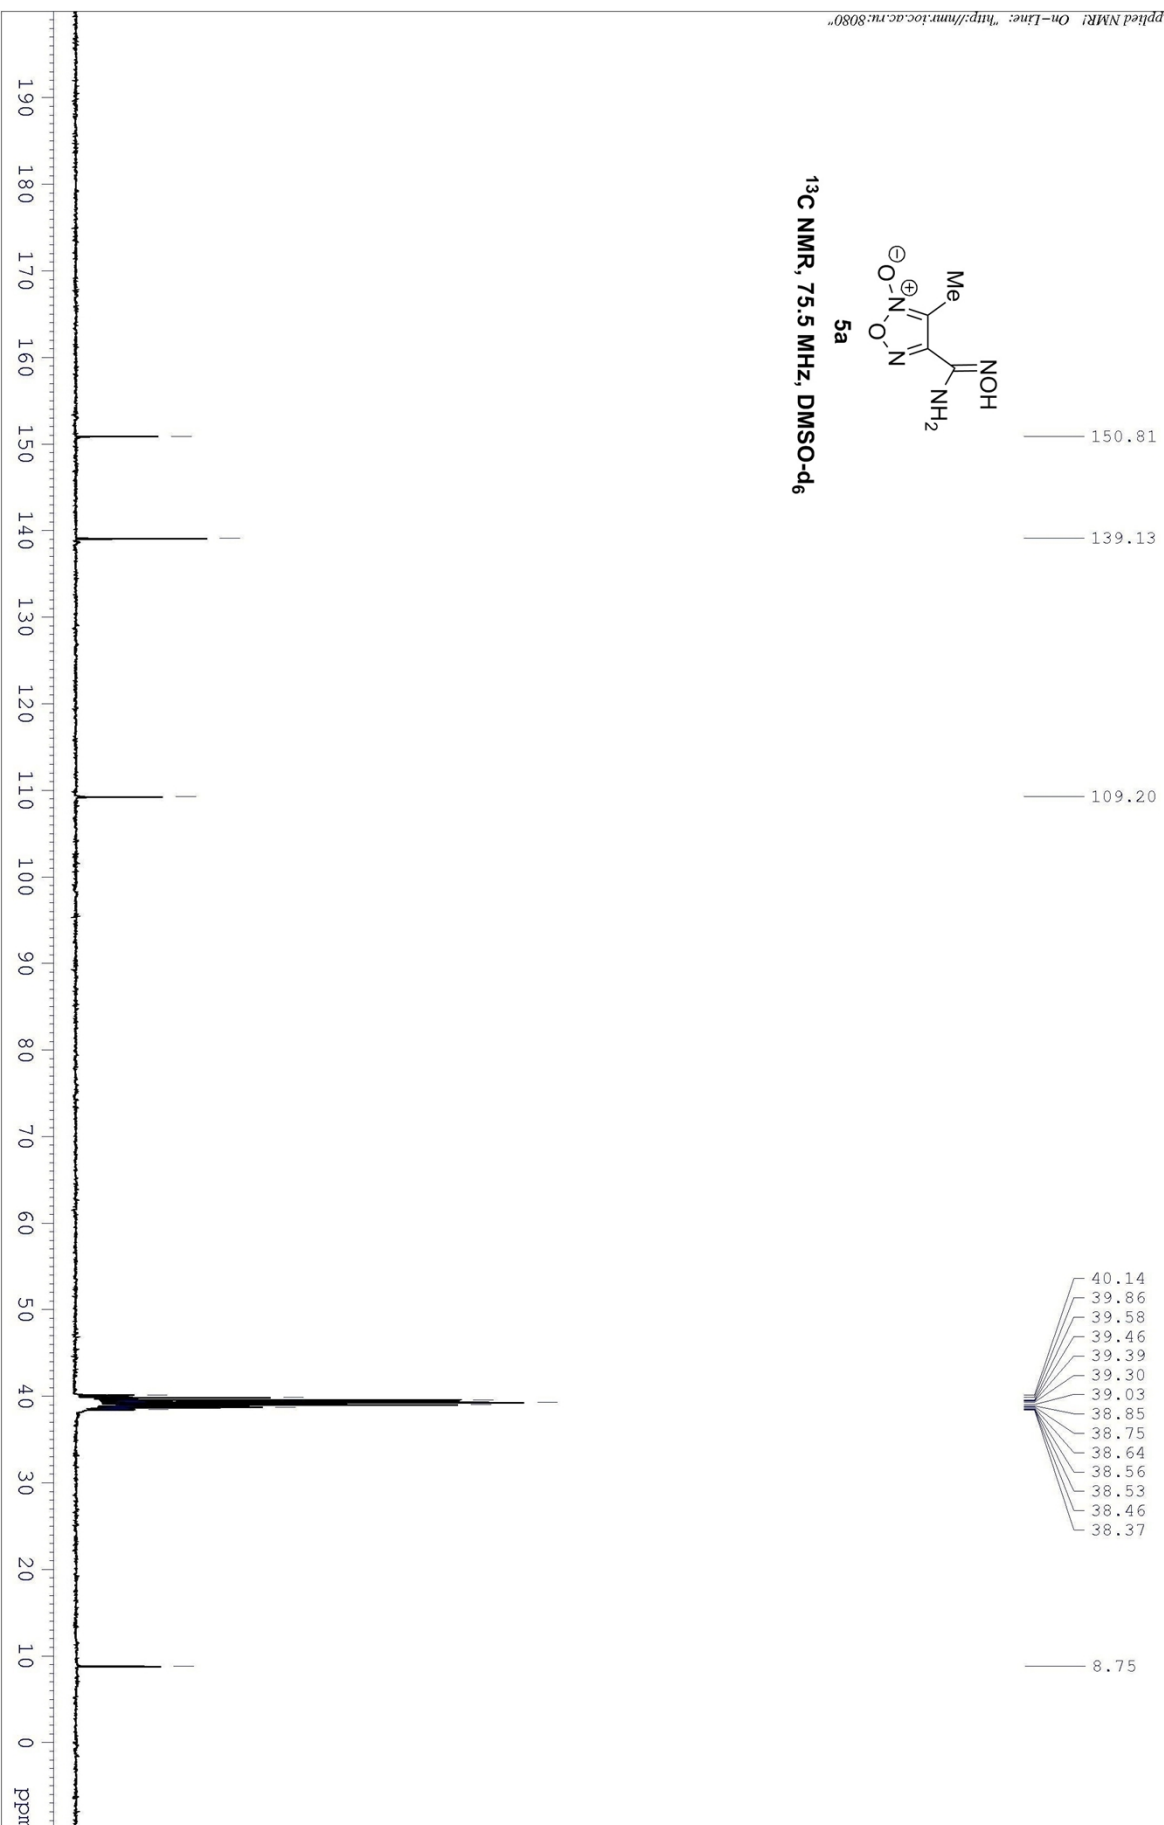



D:\EDL\LEO-660.0

ФЕРУЛАТ. LEO-660, прессовка с KBr, 1/200.

04.12.2014

Page 1/1

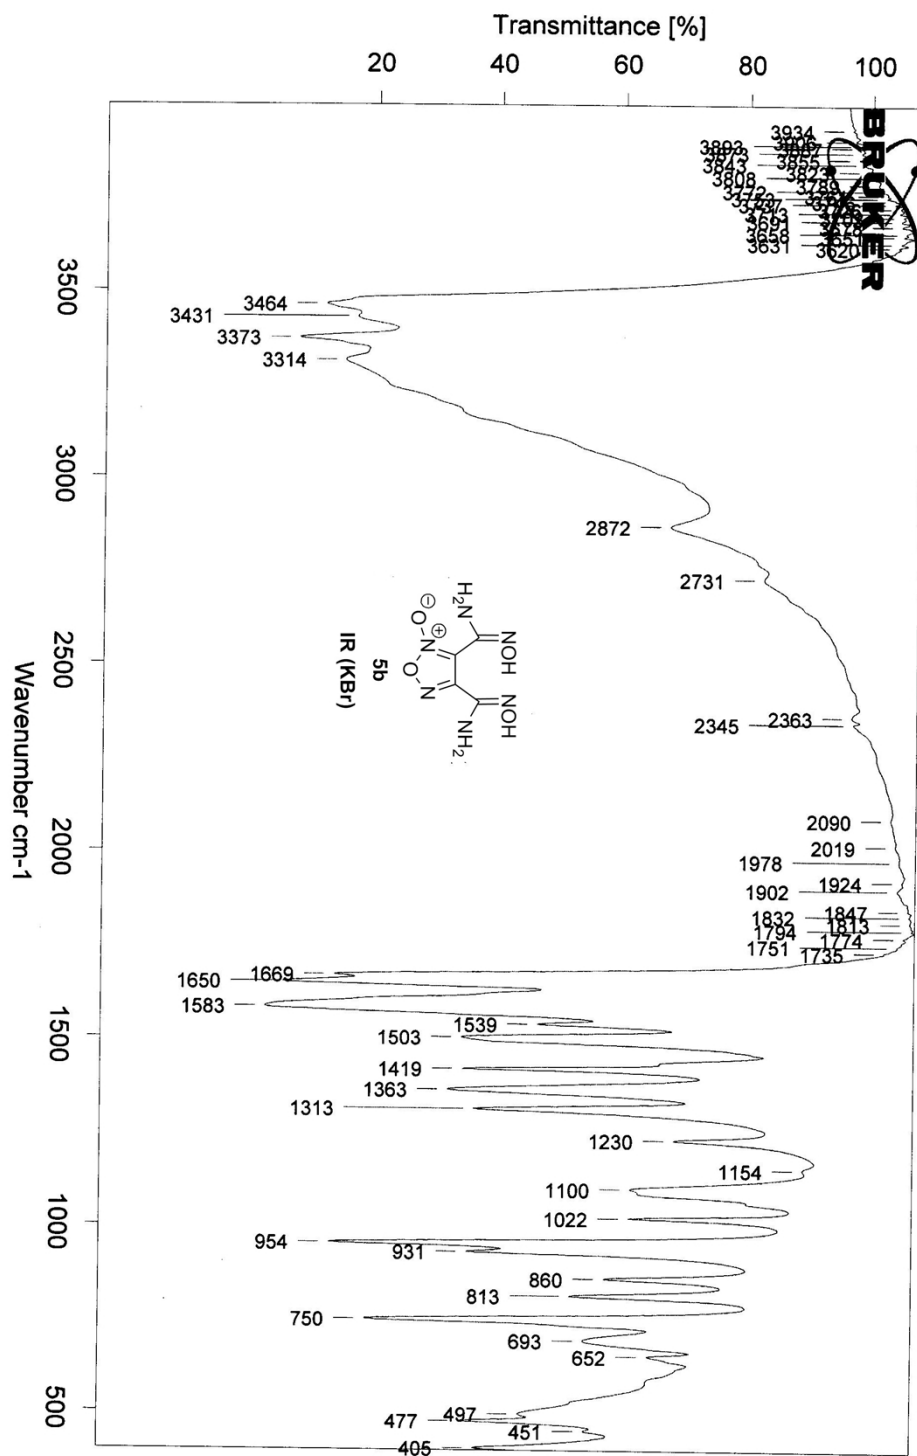

/USED 660

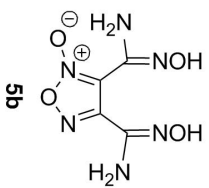

<sup>1</sup>H NMR, 300 MHz, DMSO-d<sub>6</sub>

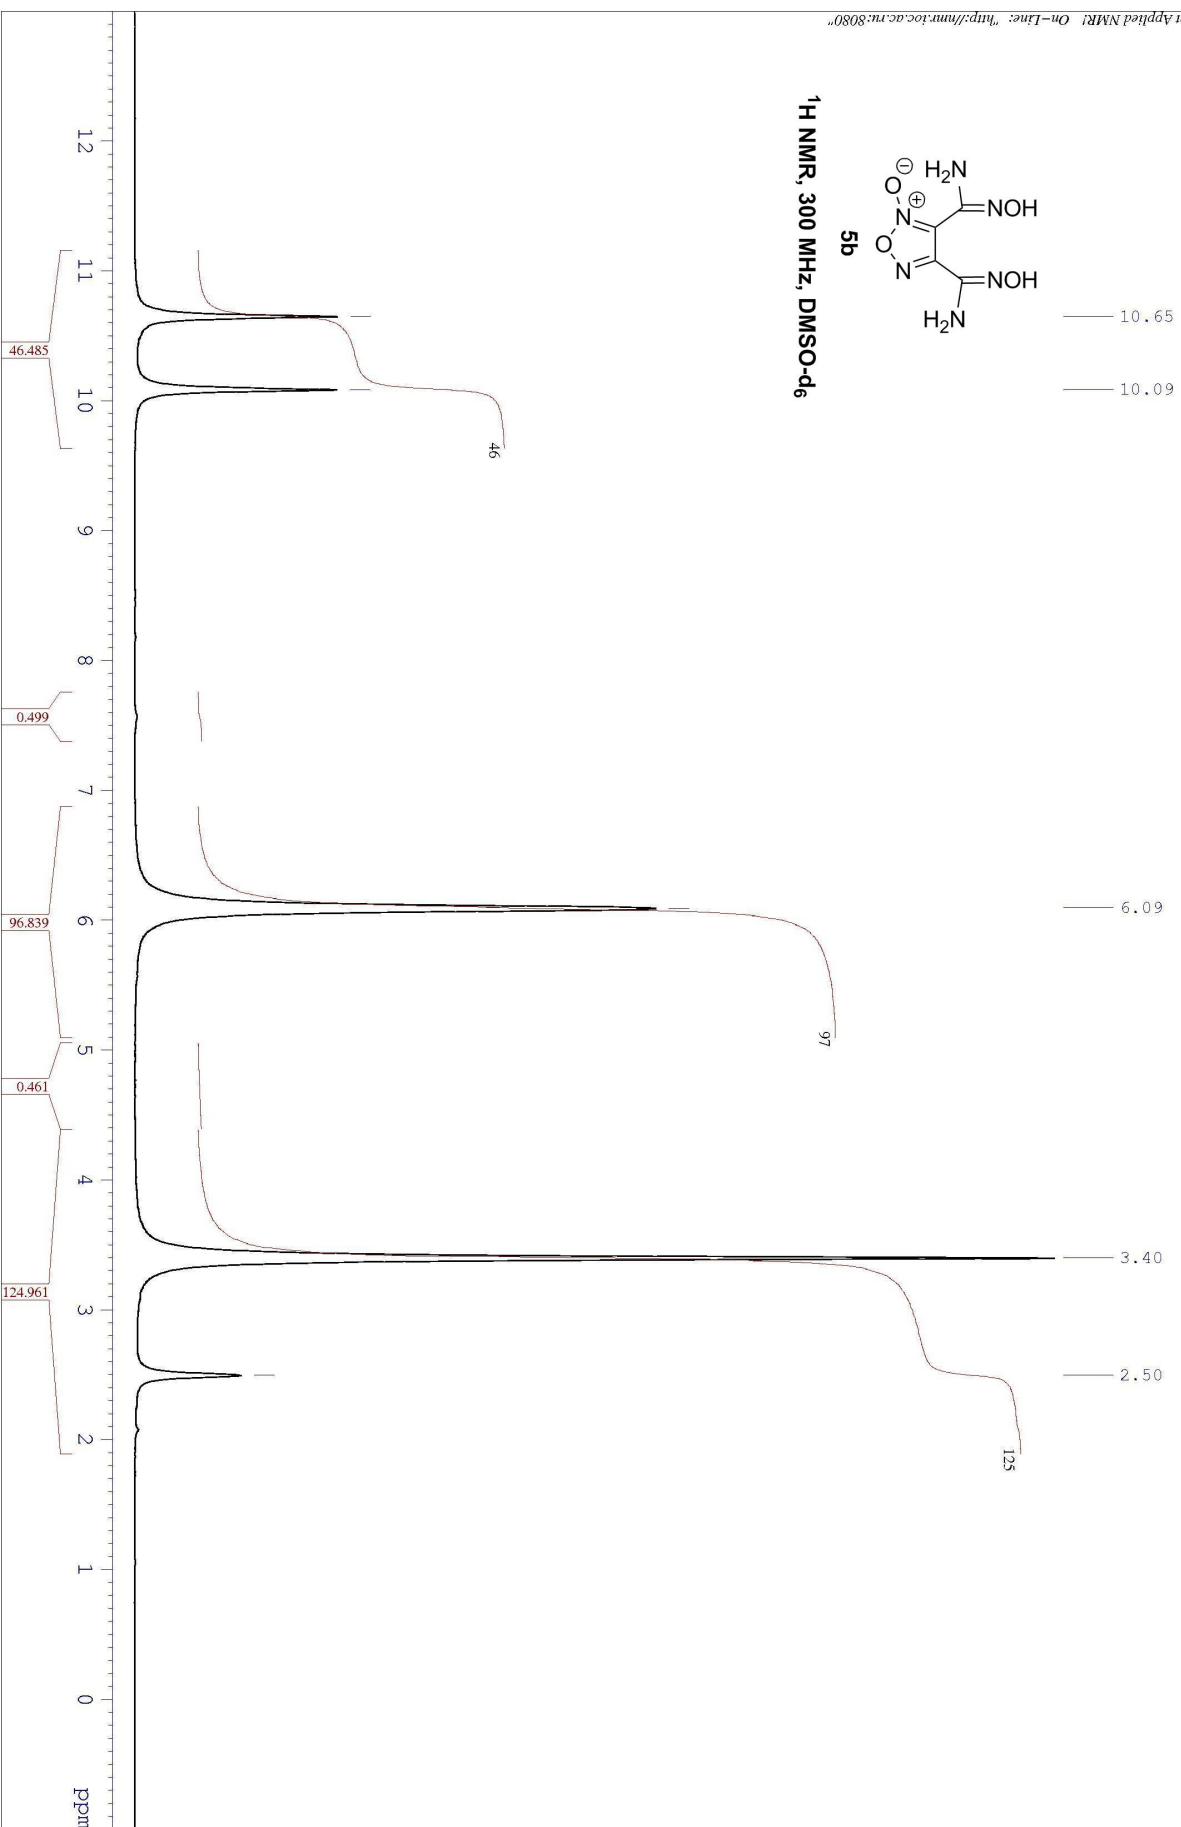

/USED 660

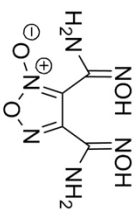

5b

<sup>13</sup>C NMR, 75.5 MHz, DMSO-d<sub>6</sub>

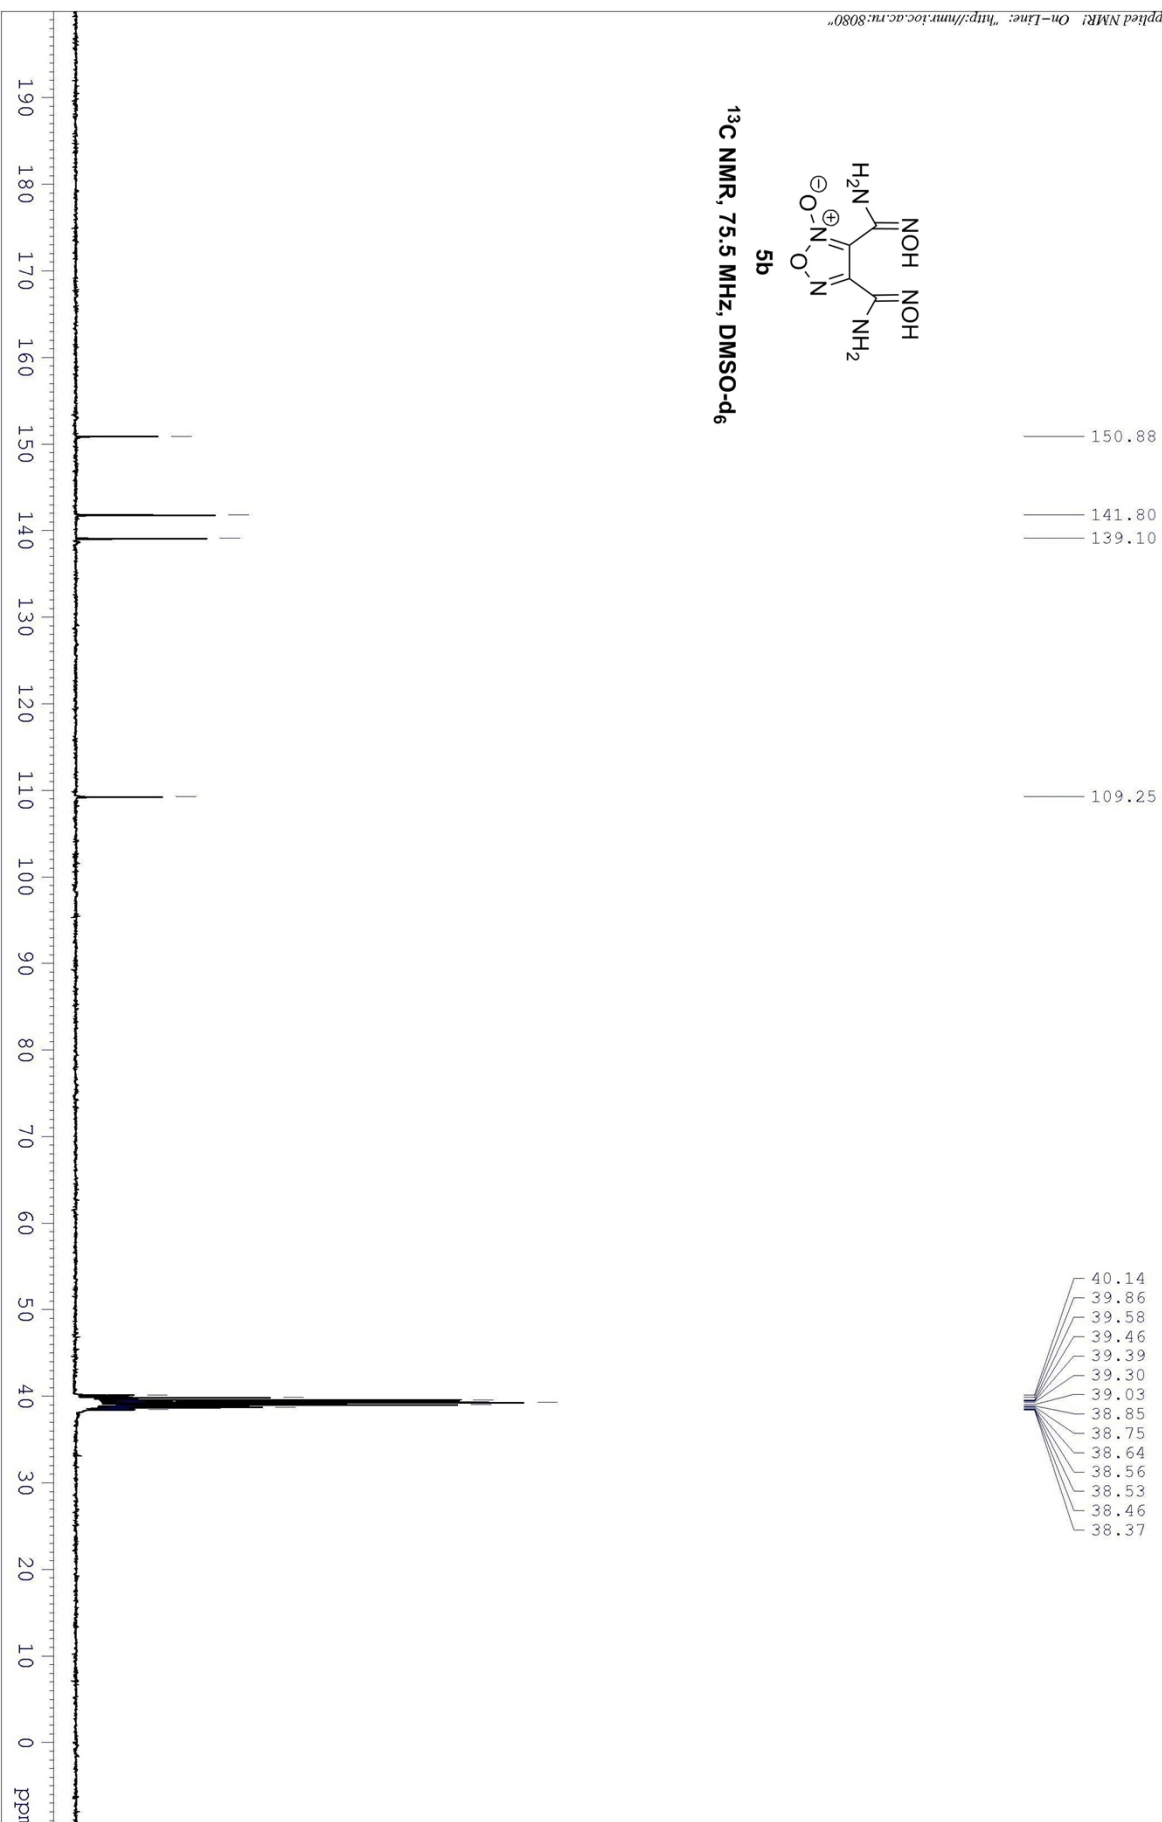

/USED 641

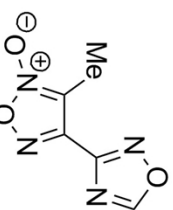

6a

<sup>1</sup>H NMR, 200 MHz, CDCl<sub>3</sub>

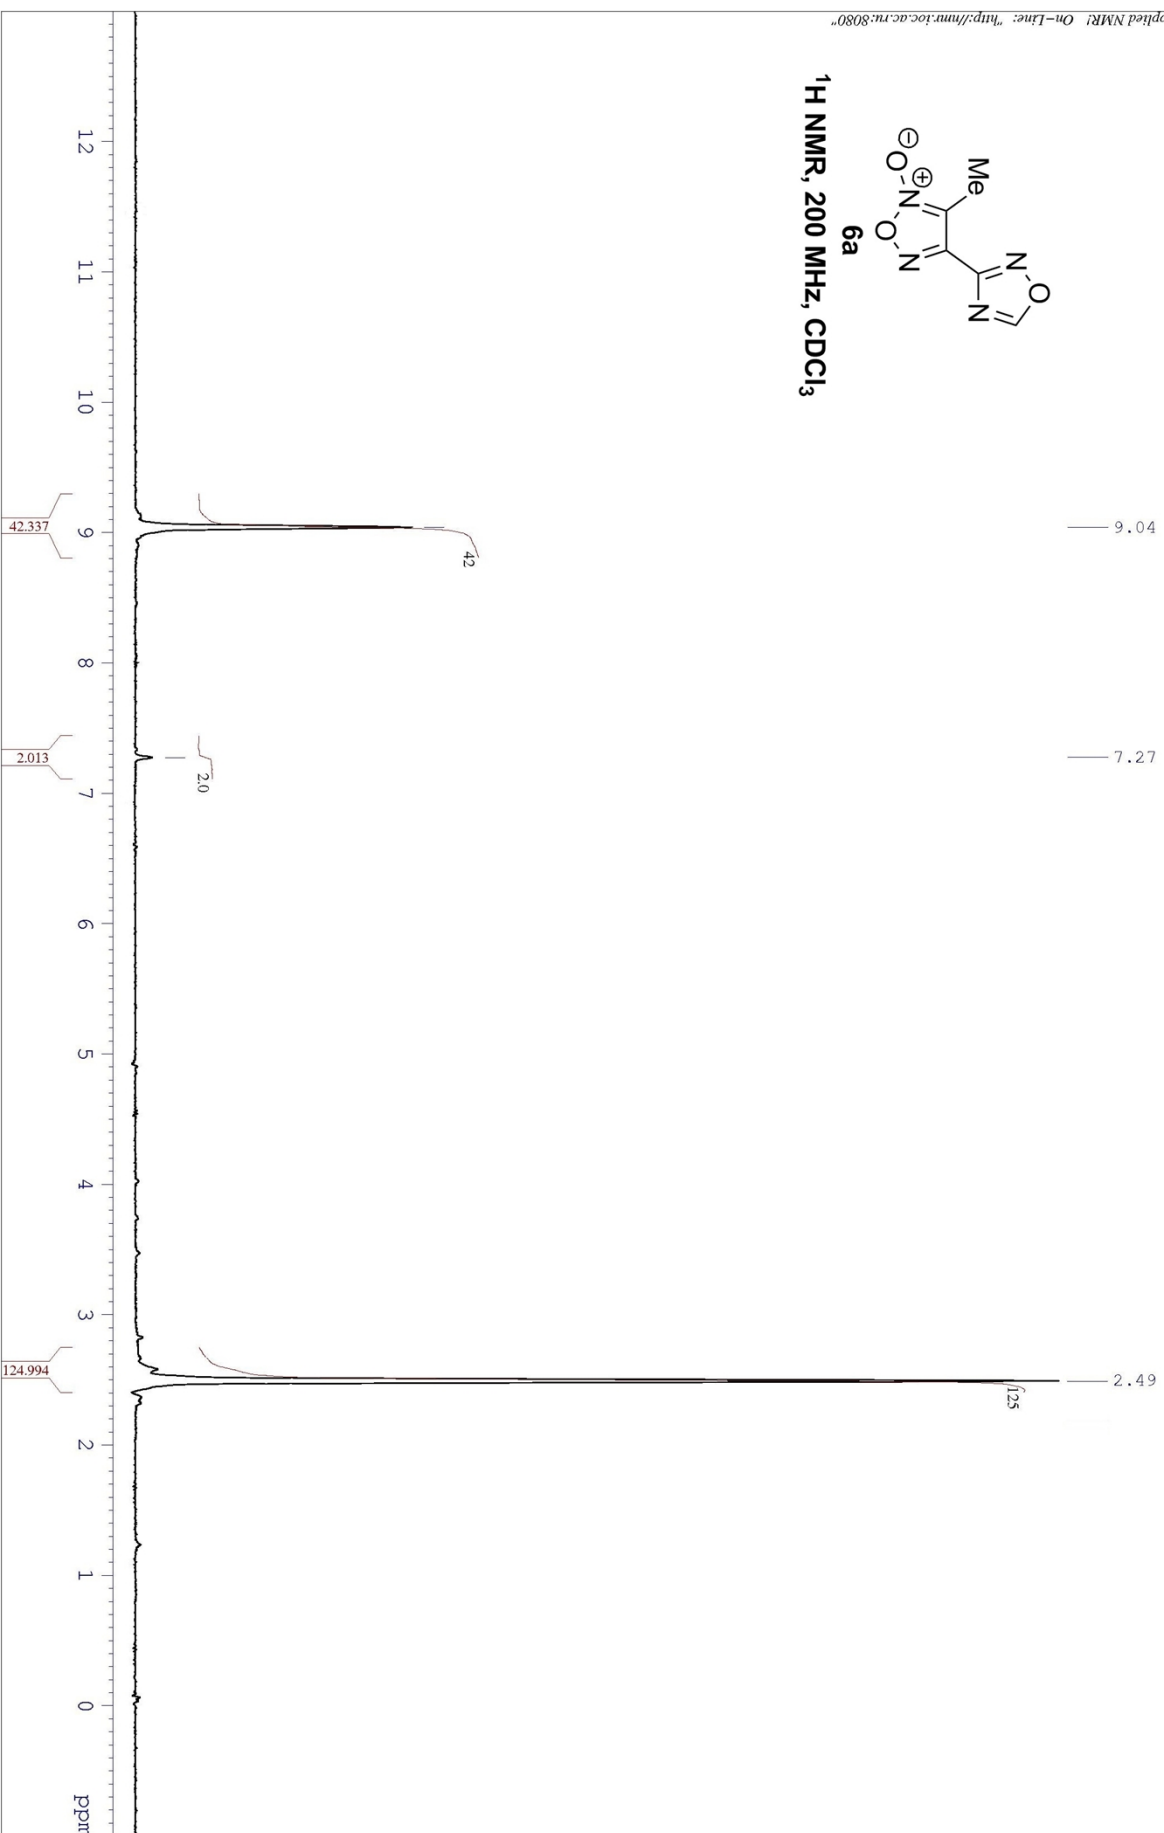

/USED 641.C13

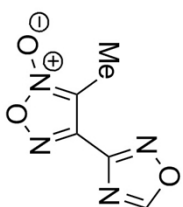

6a

<sup>13</sup>C NMR, 50 MHz, CDCl<sub>3</sub>

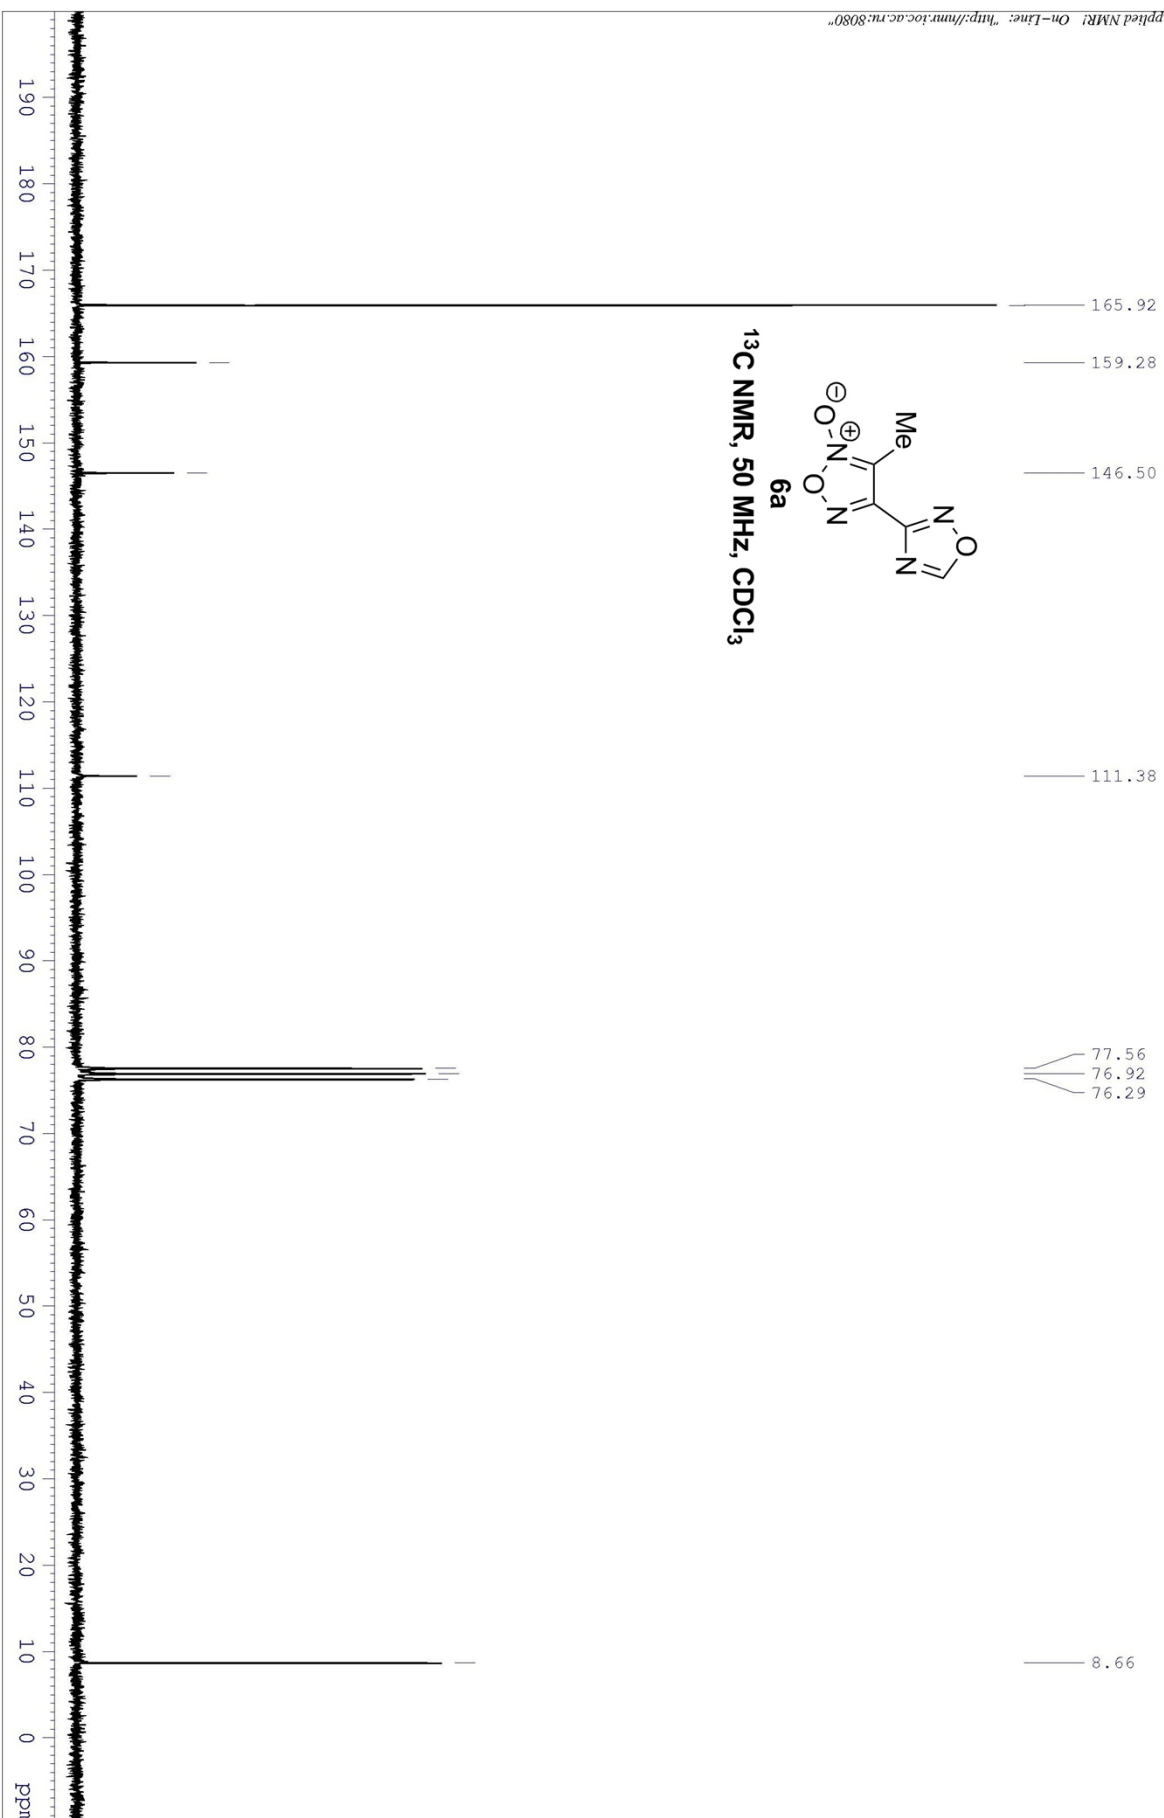

/USED 672

© Zelinsky Institute of Organic Chemistry, Moscow; Bruker AM300 SF=300.13 MHz [1H] SF=16K SW=9009.01=2401 PW=9.0 AQ=0.901 RD=3.00 NS=1 SR=-1.12 TE=296K 30 September 2014 Opr: Struchkova M.I.; Solv: DMSO-d6;

9.96  
9.90

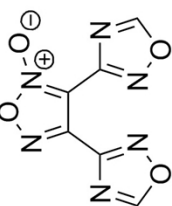

6b

<sup>1</sup>H NMR, 300 MHz, DMSO-d<sub>6</sub>

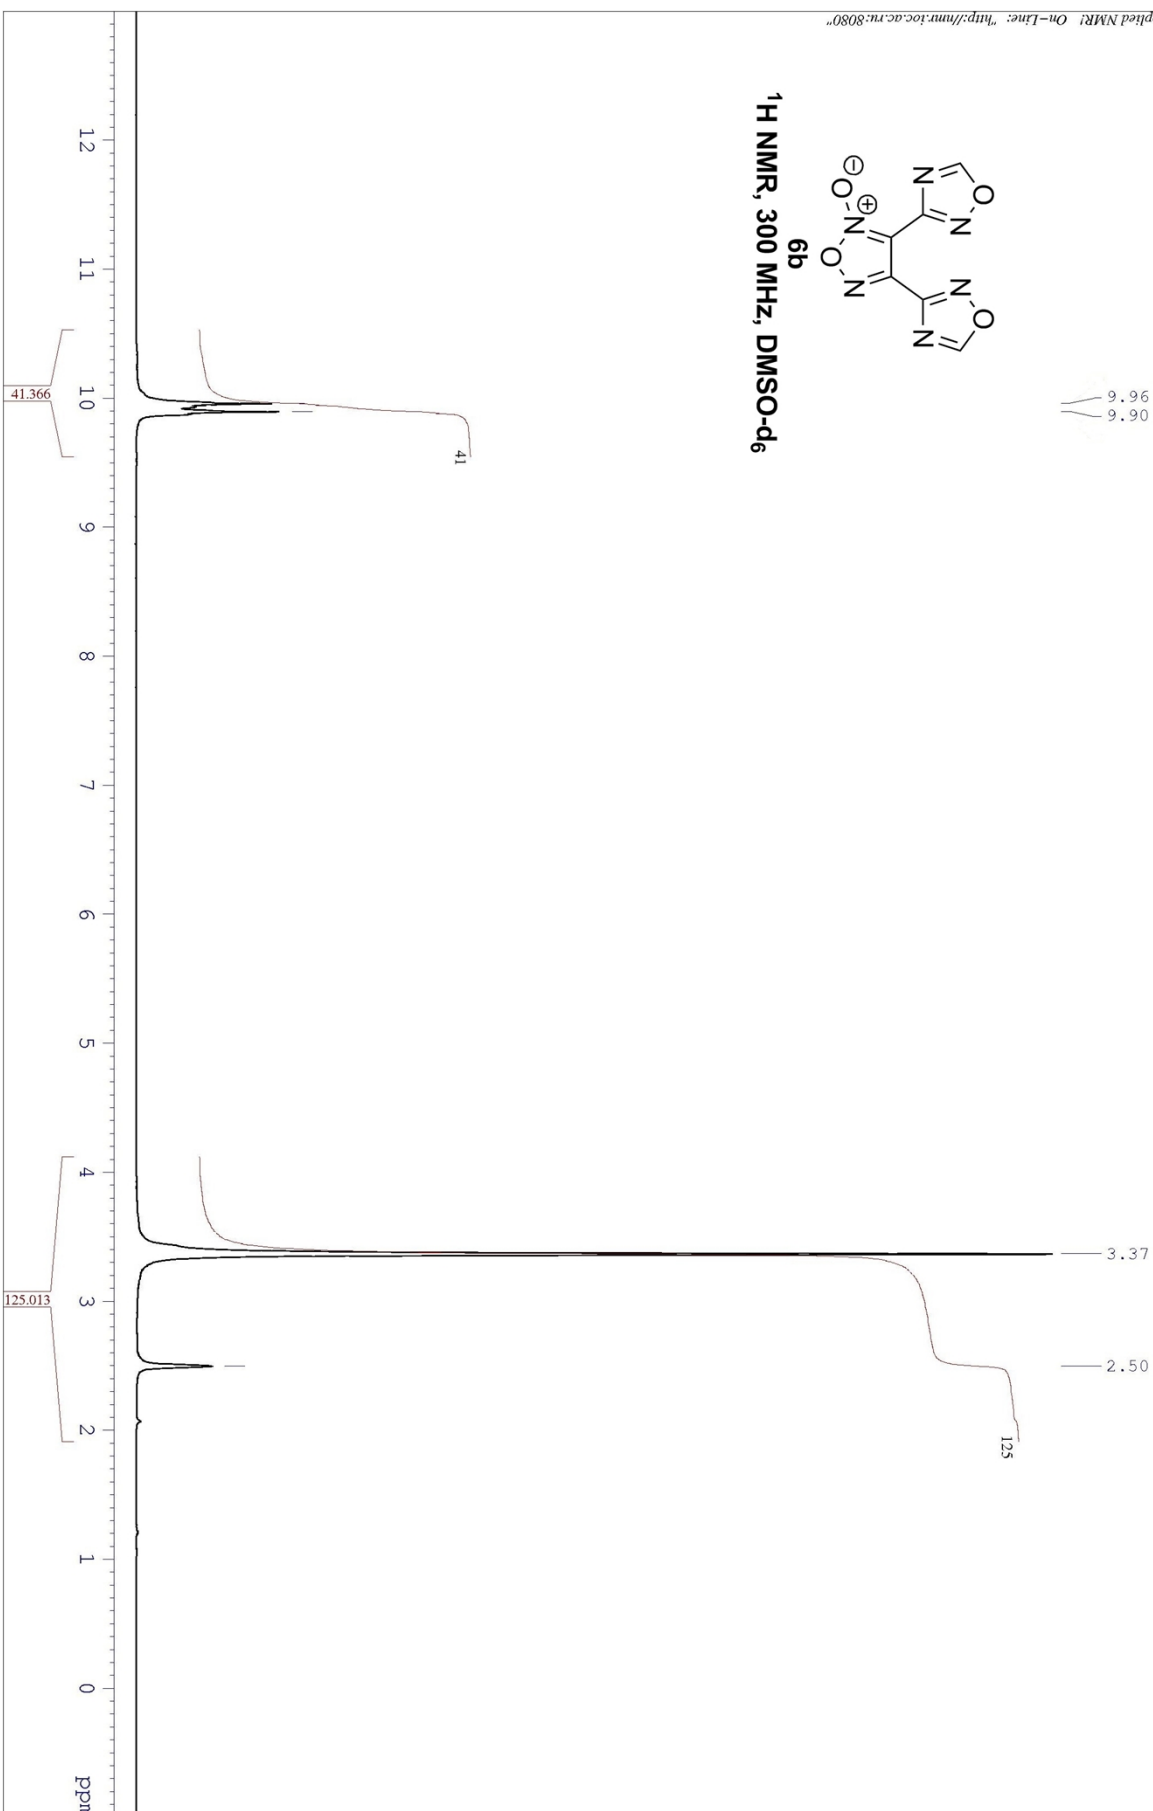

/USED 672.C13

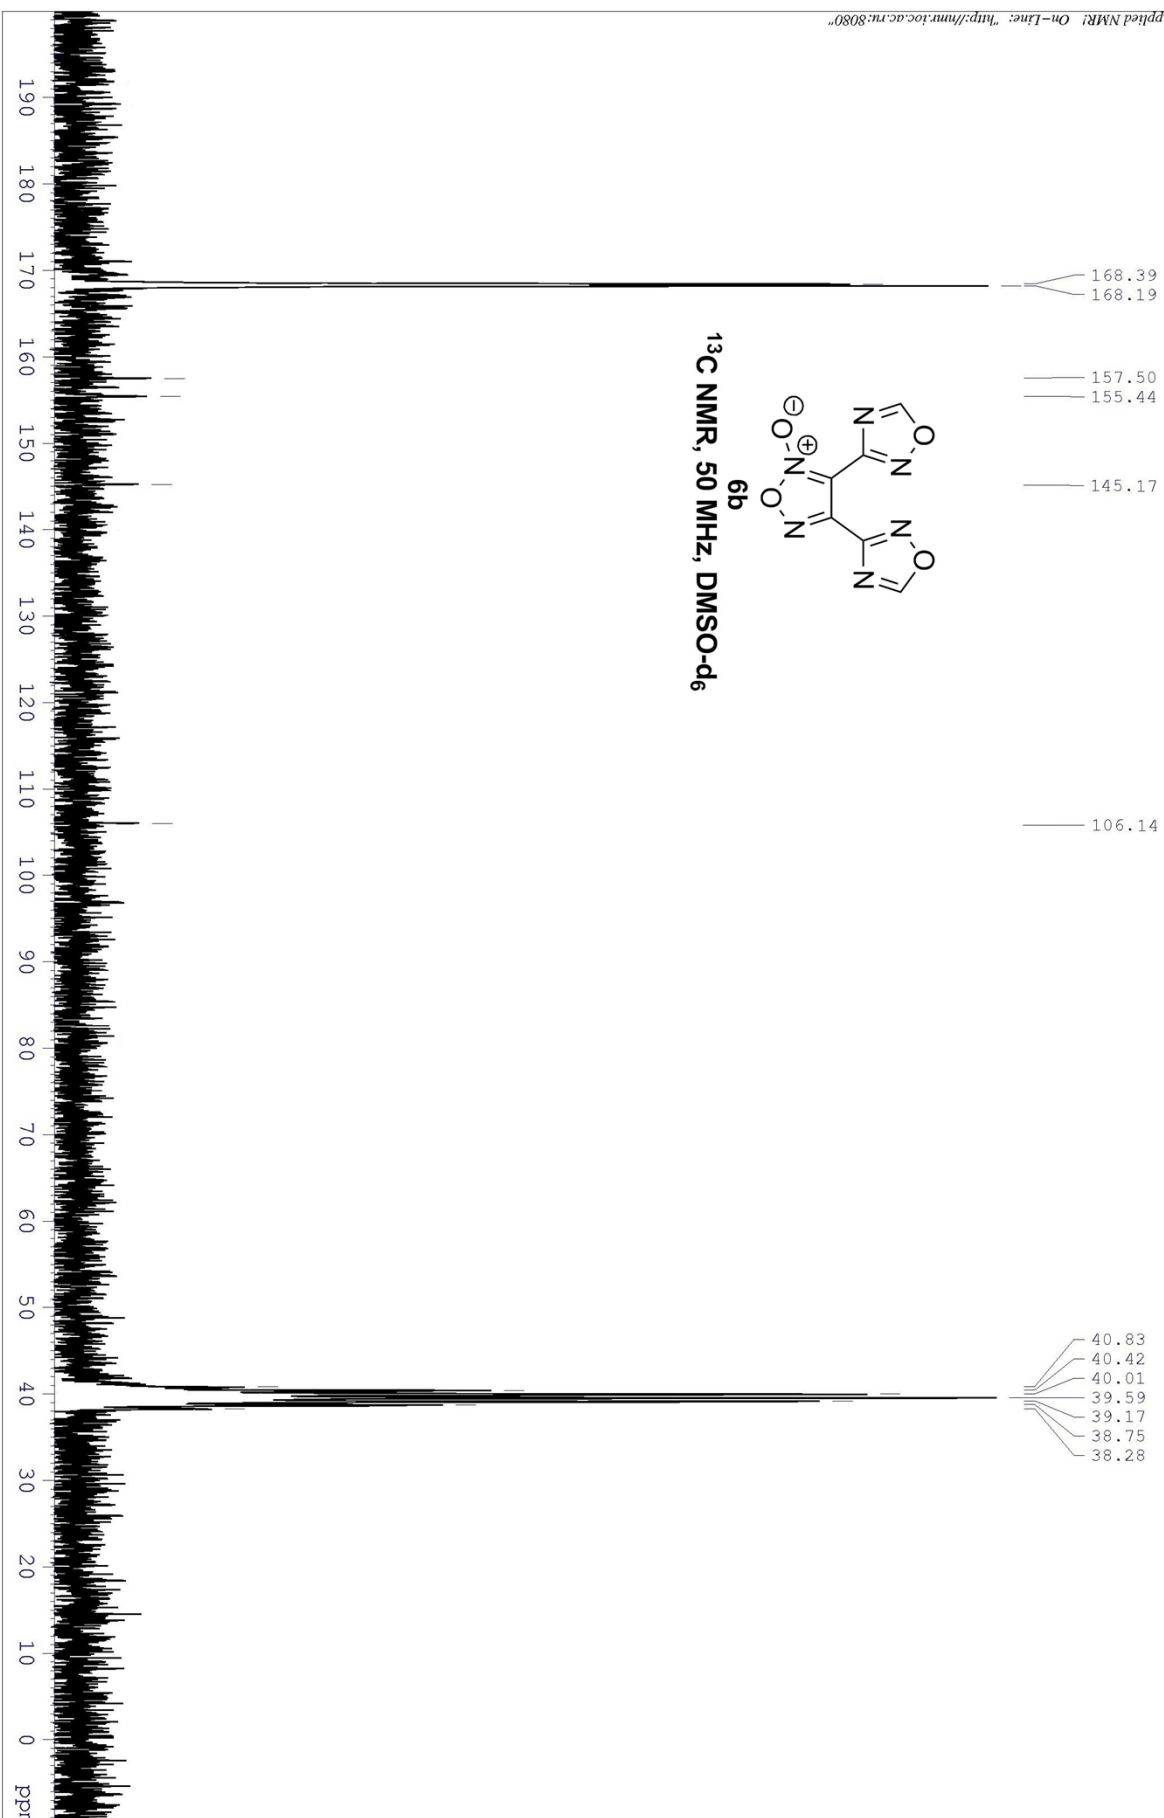

/USED 669

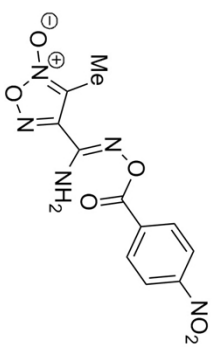

**4a**  
**<sup>1</sup>H NMR, 200 MHz, DMSO-d<sub>6</sub>**

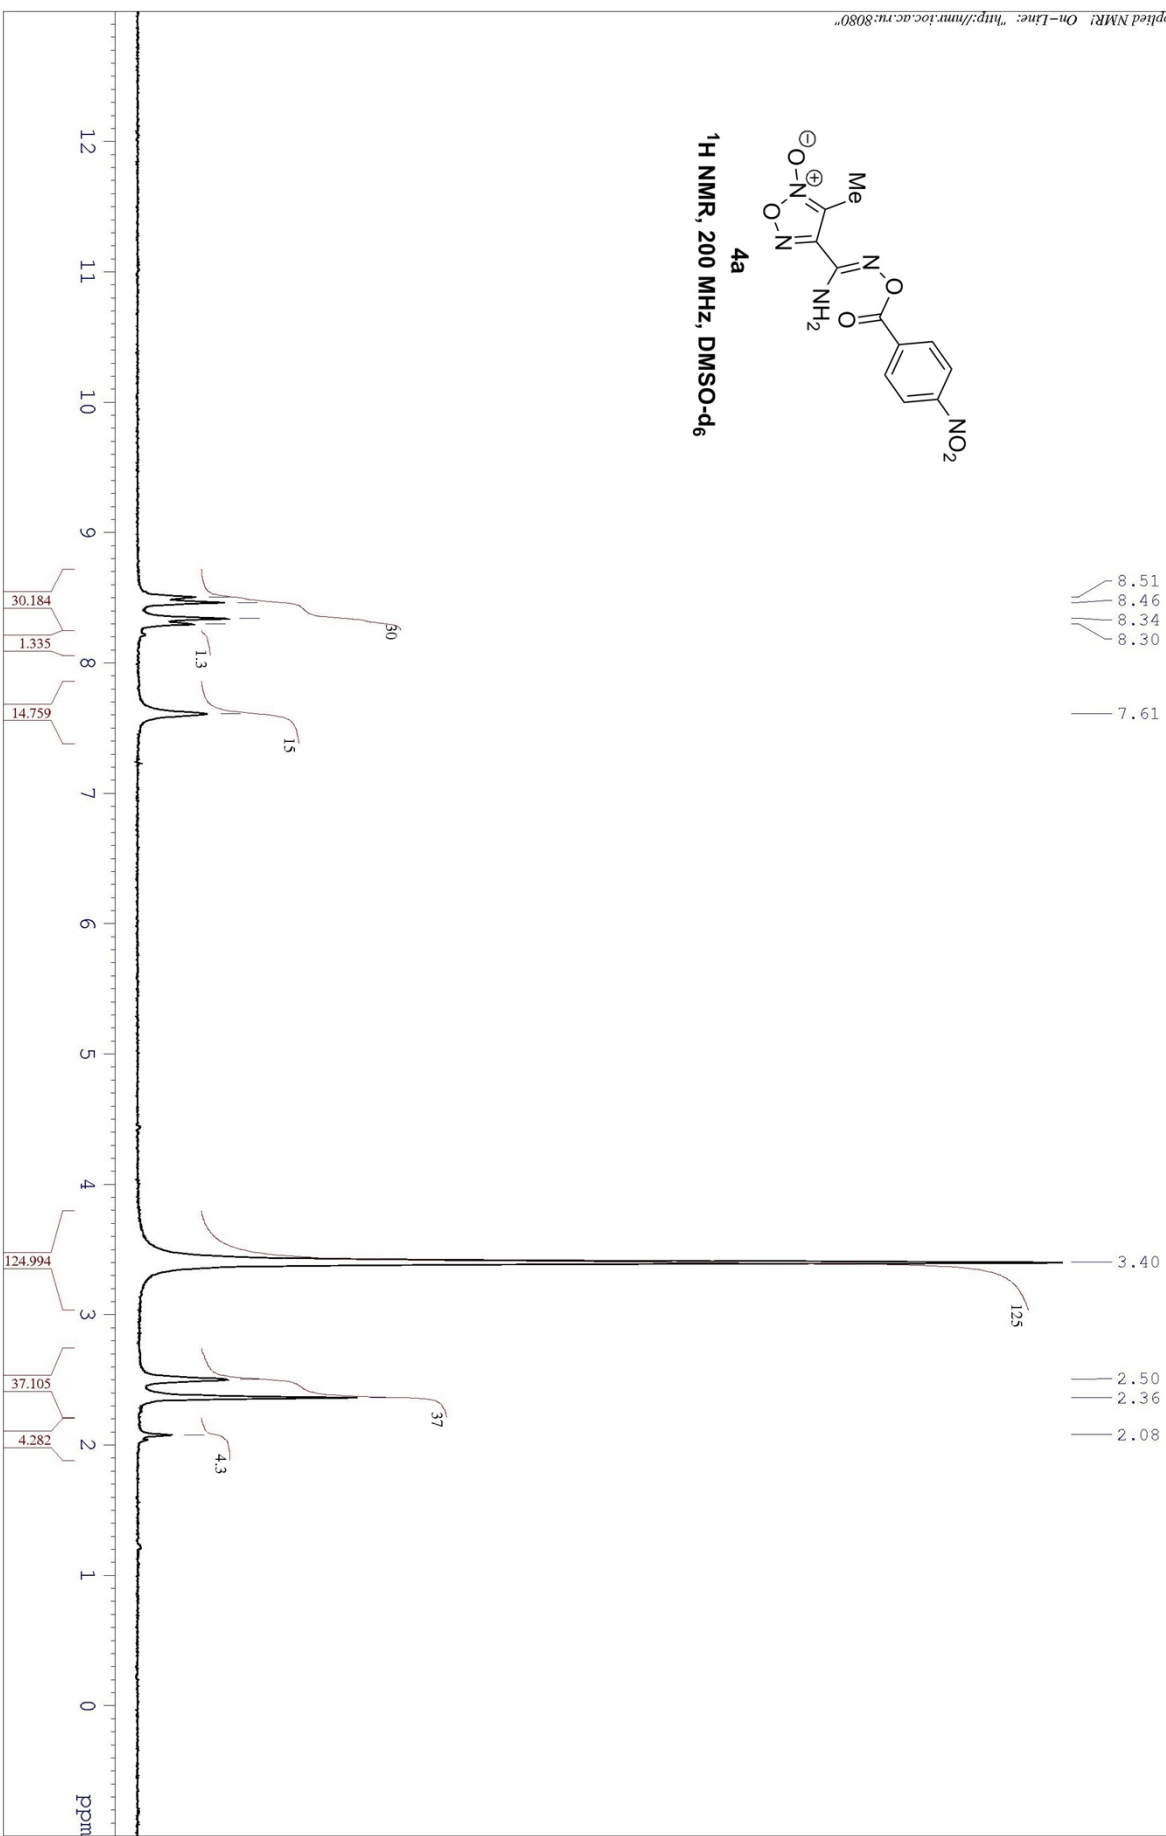



# /USED 669

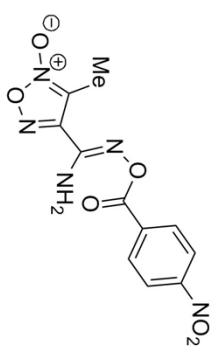

4a

<sup>13</sup>C NMR, 75.5 MHz, DMSO-d<sub>6</sub>

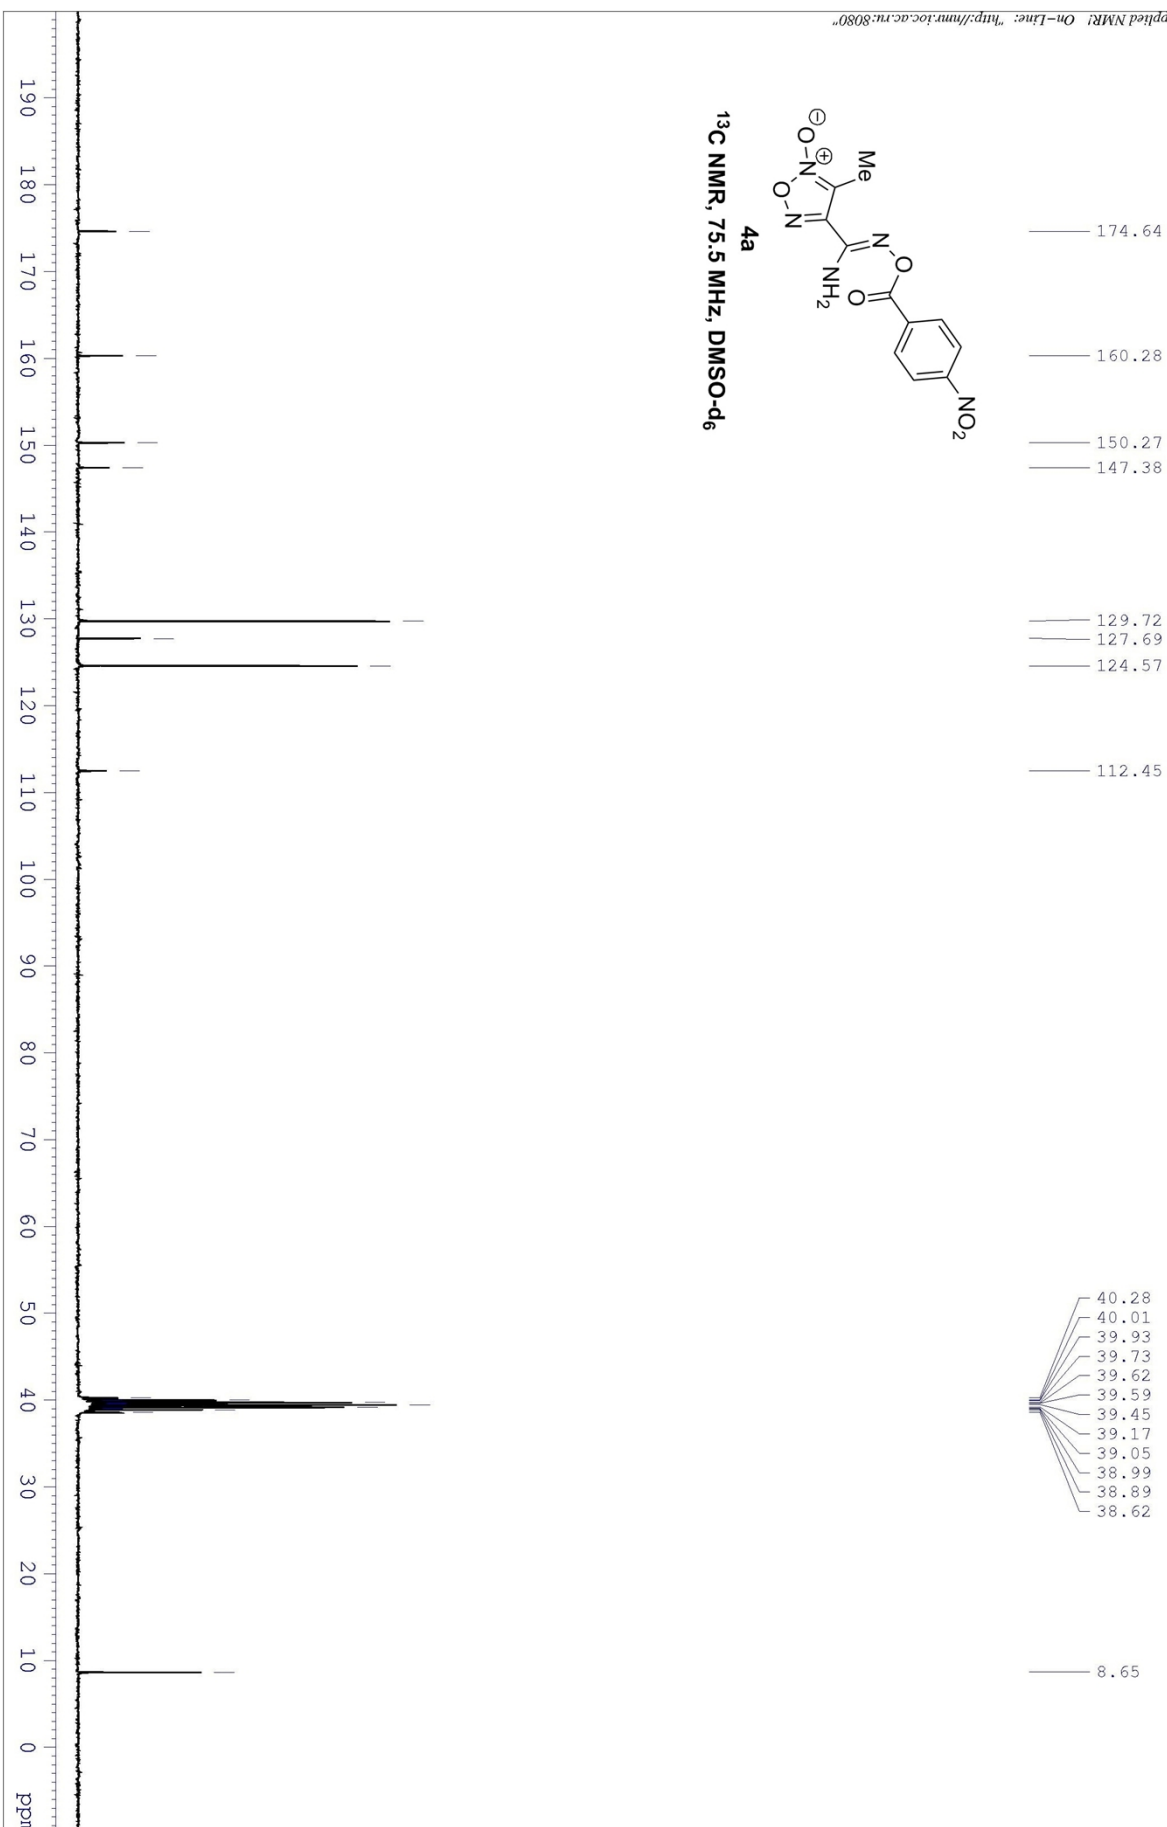

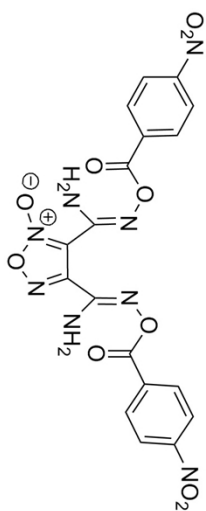

4b

<sup>1</sup>H NMR, 200 MHz, DMSO-d<sub>6</sub>

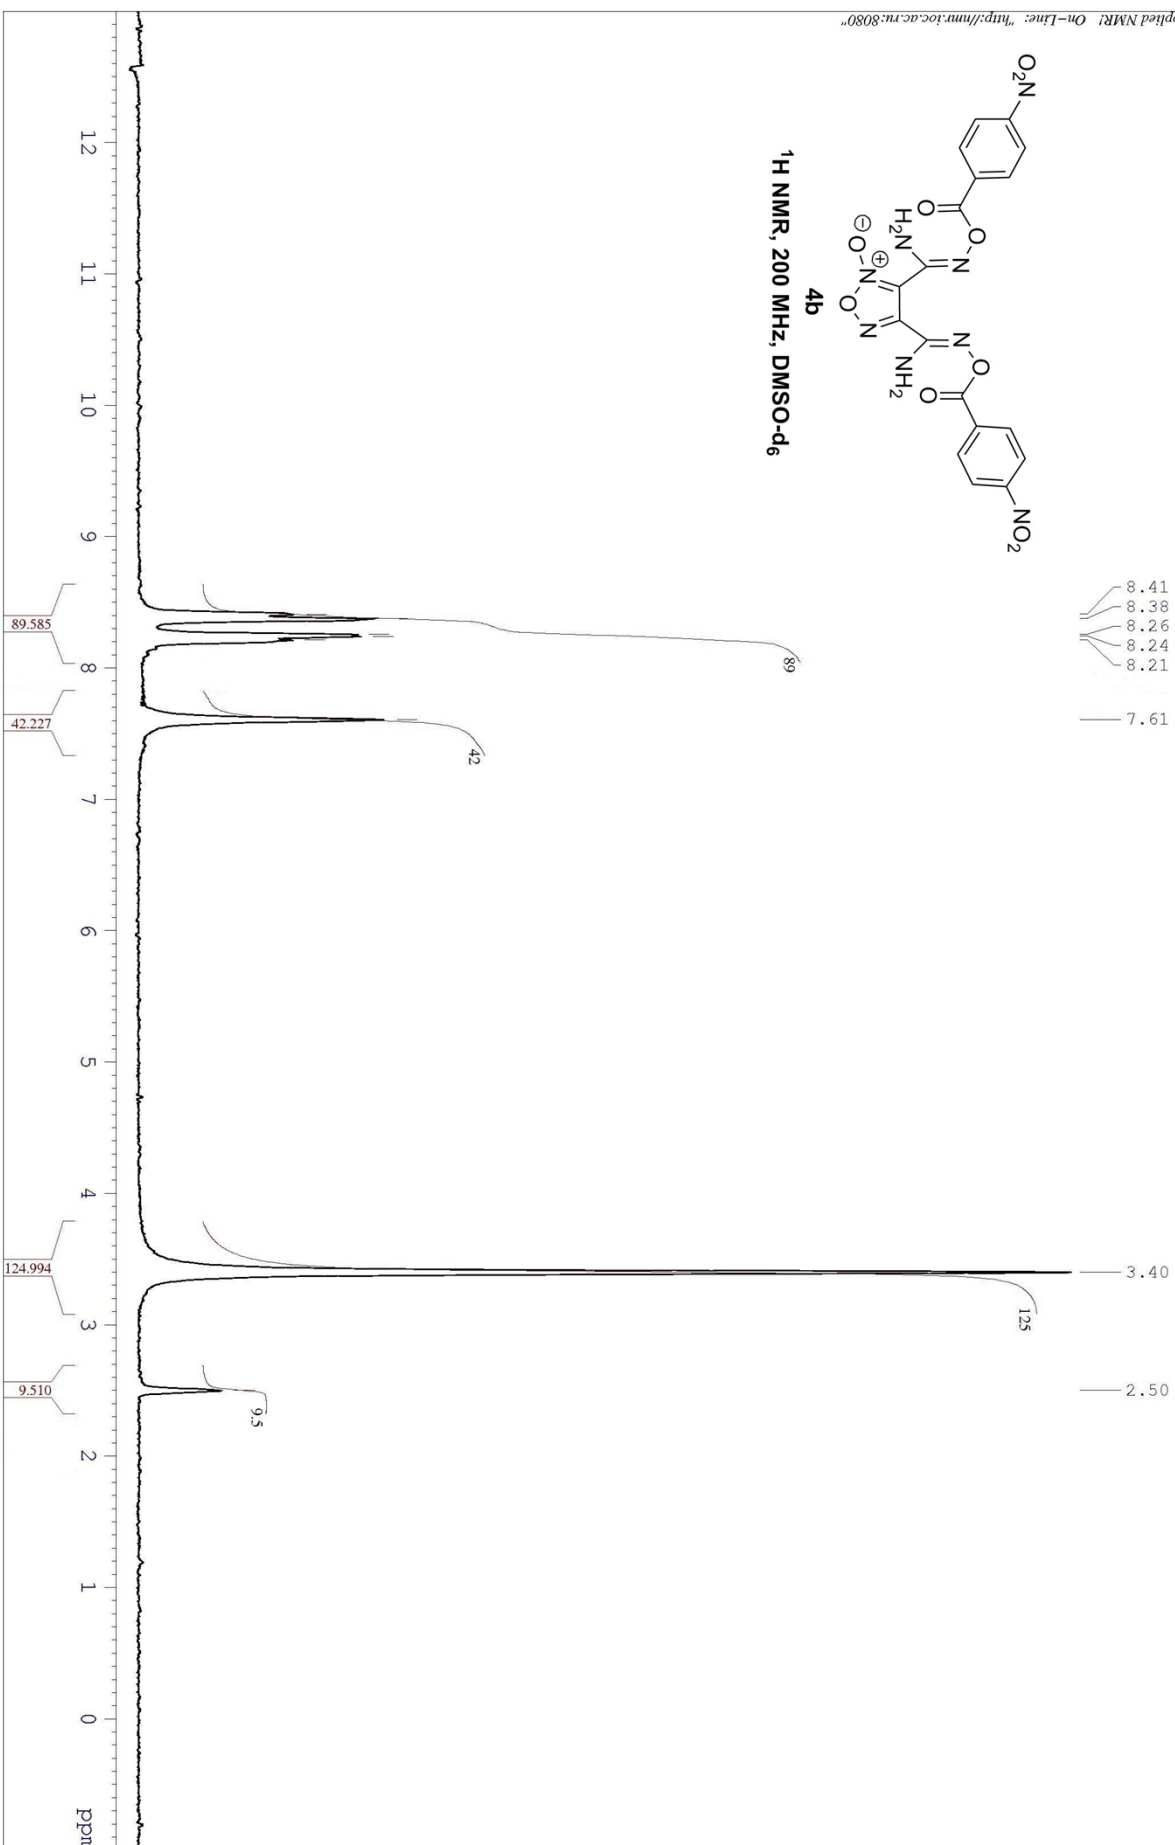

# /USED 683

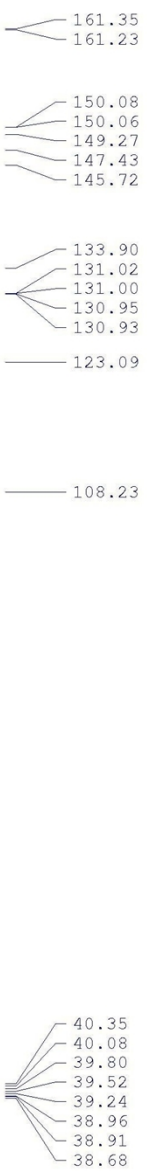

4b

<sup>13</sup>C NMR, 75.5 MHz, DMSO-d<sub>6</sub>

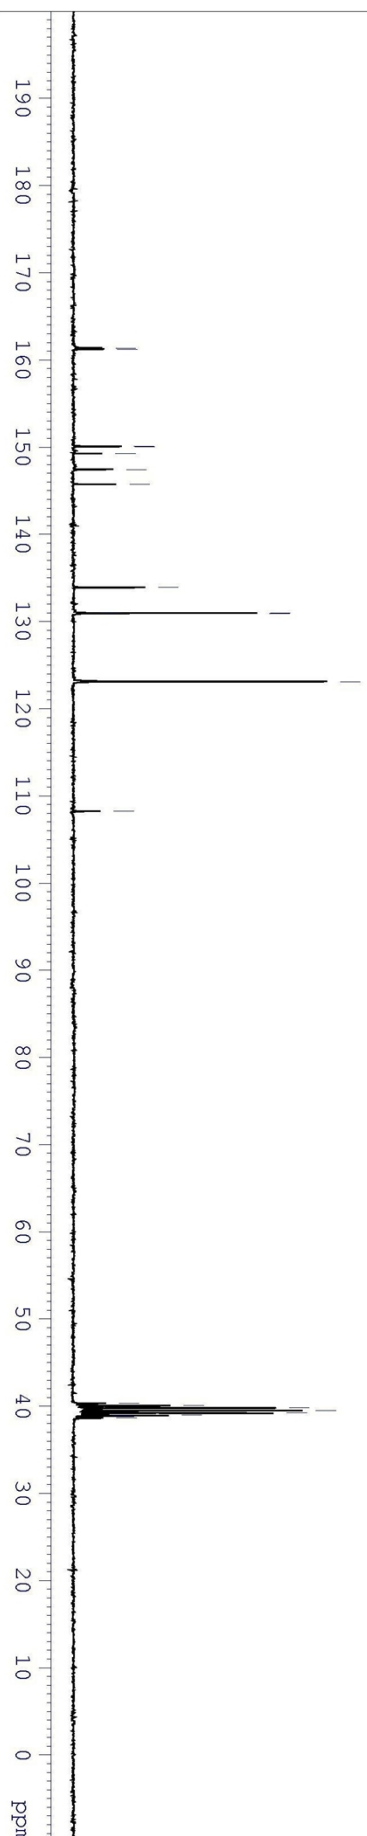

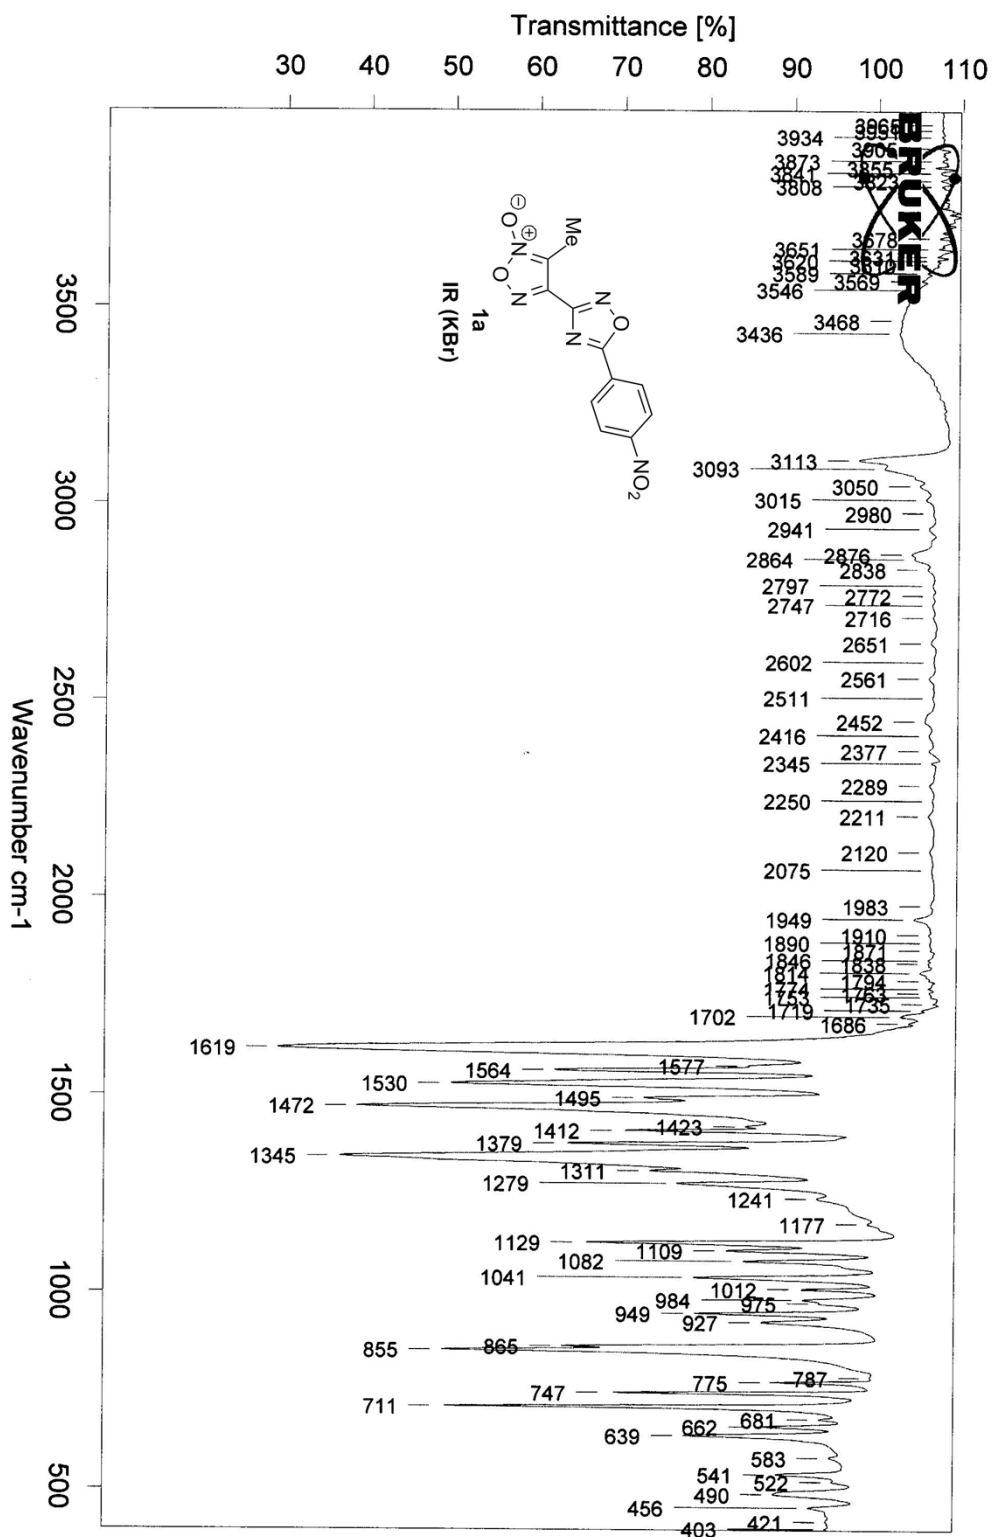

/USED 751

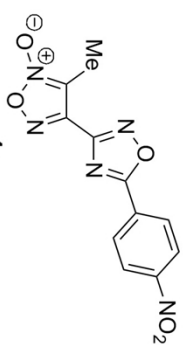

<sup>1</sup>H NMR, 300 MHz, DMSO-d<sub>6</sub>

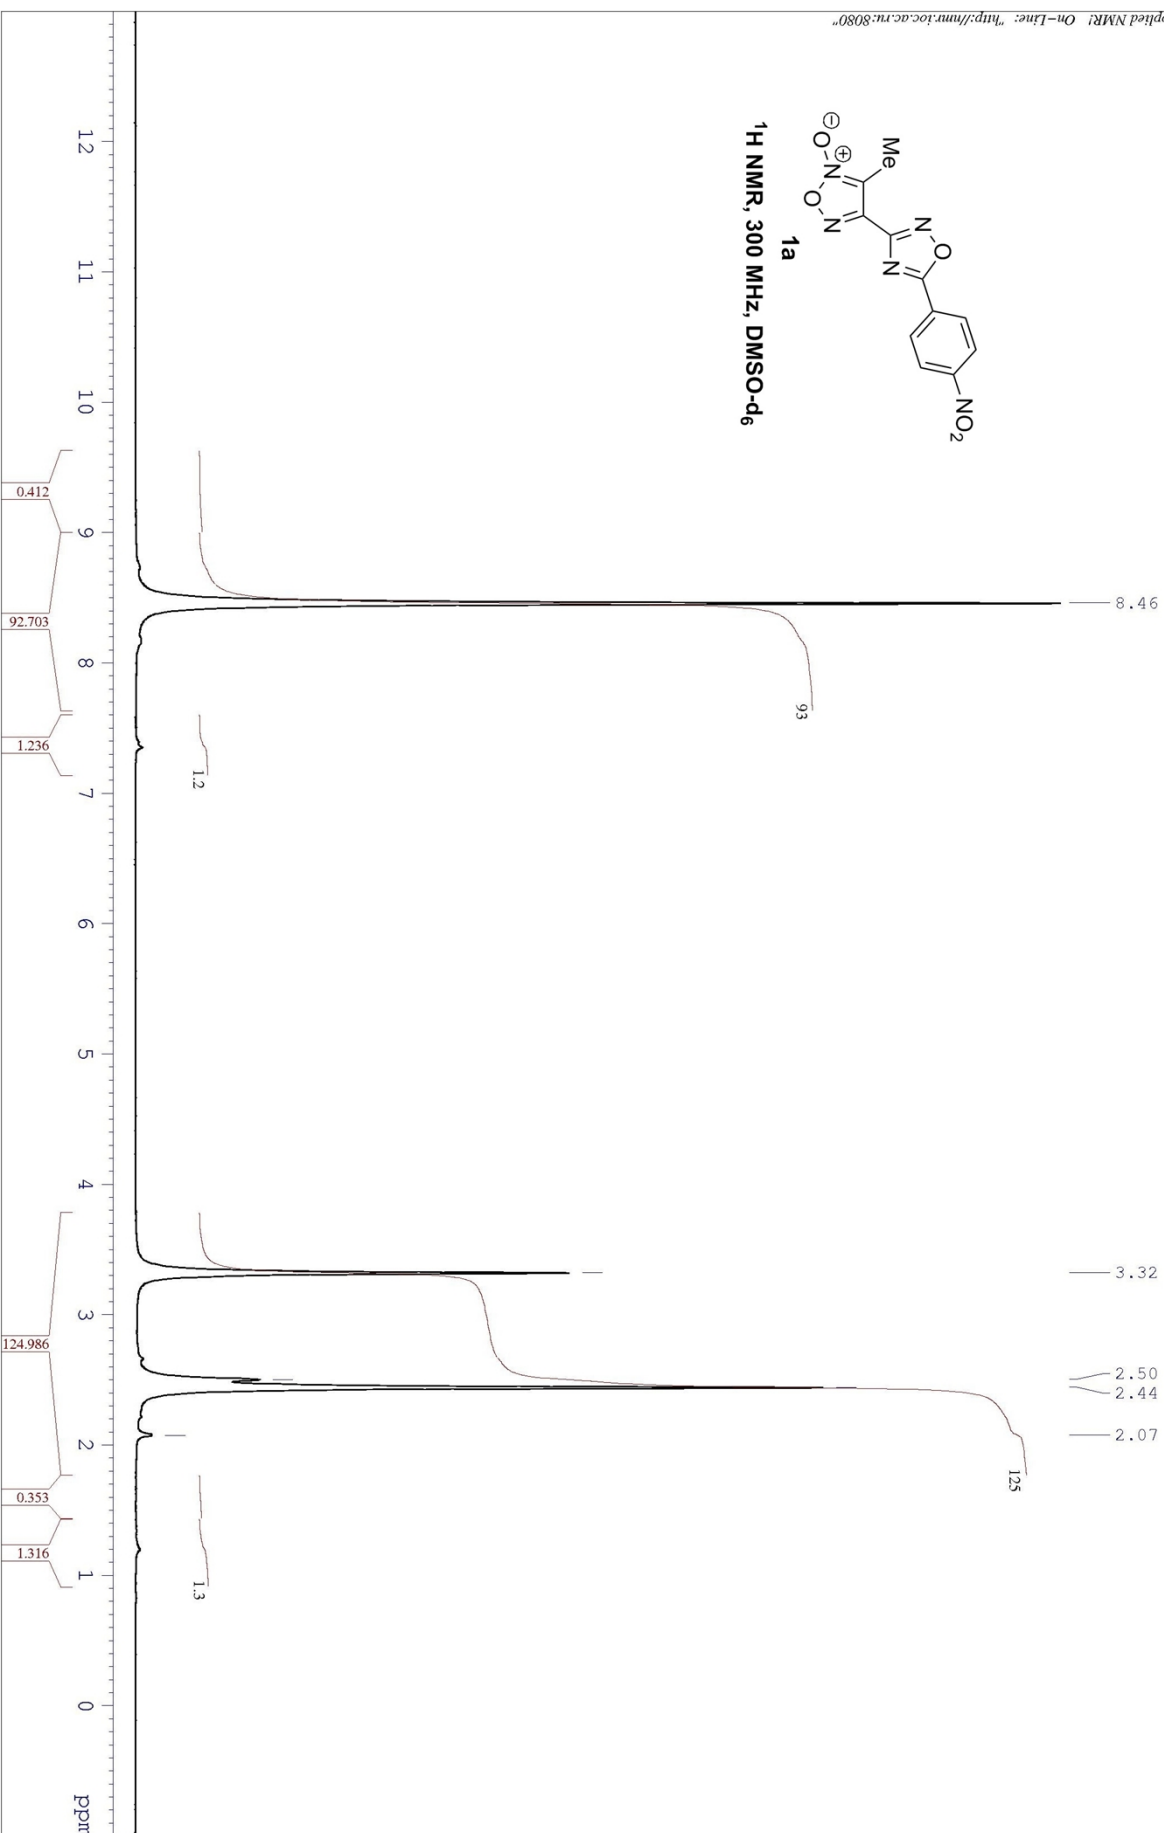

/USED 751

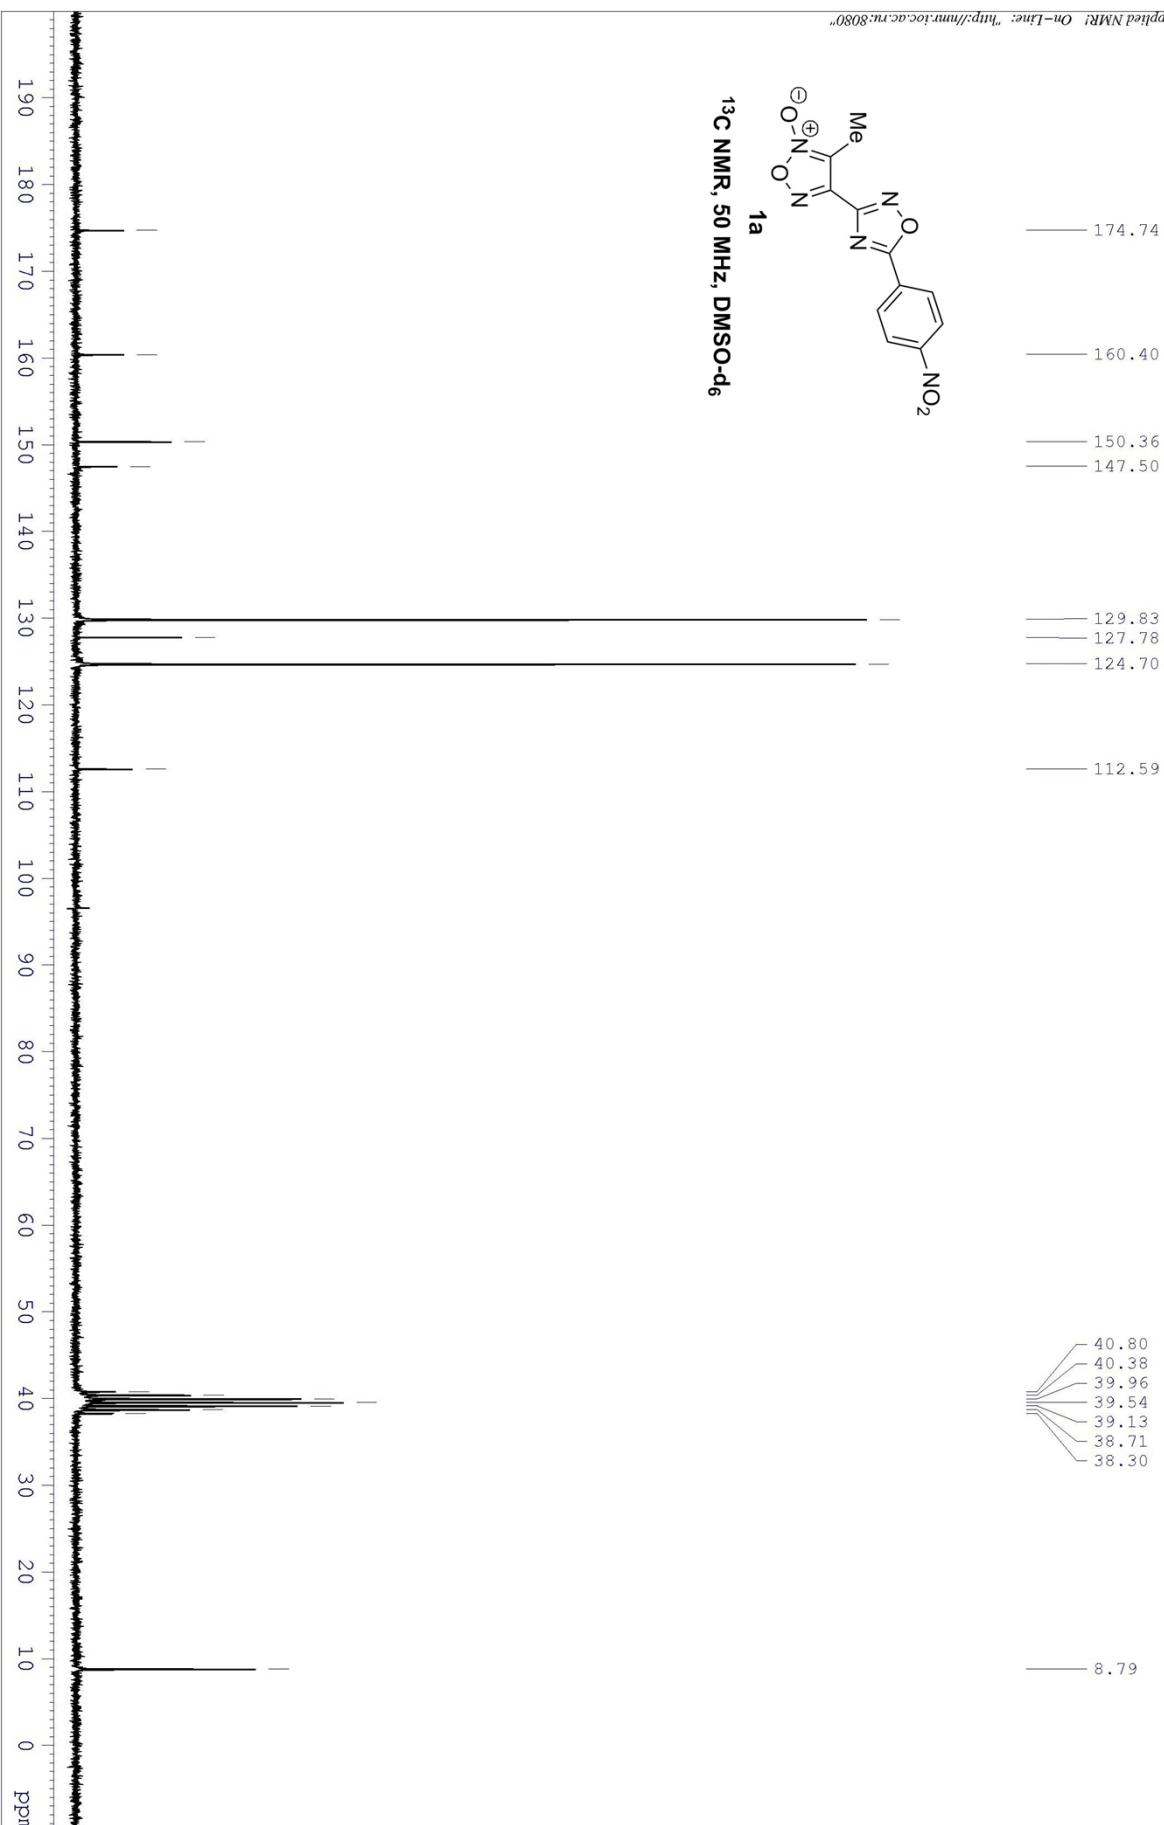

Transmittance [%]

40 50 60 70 80 90 100 110

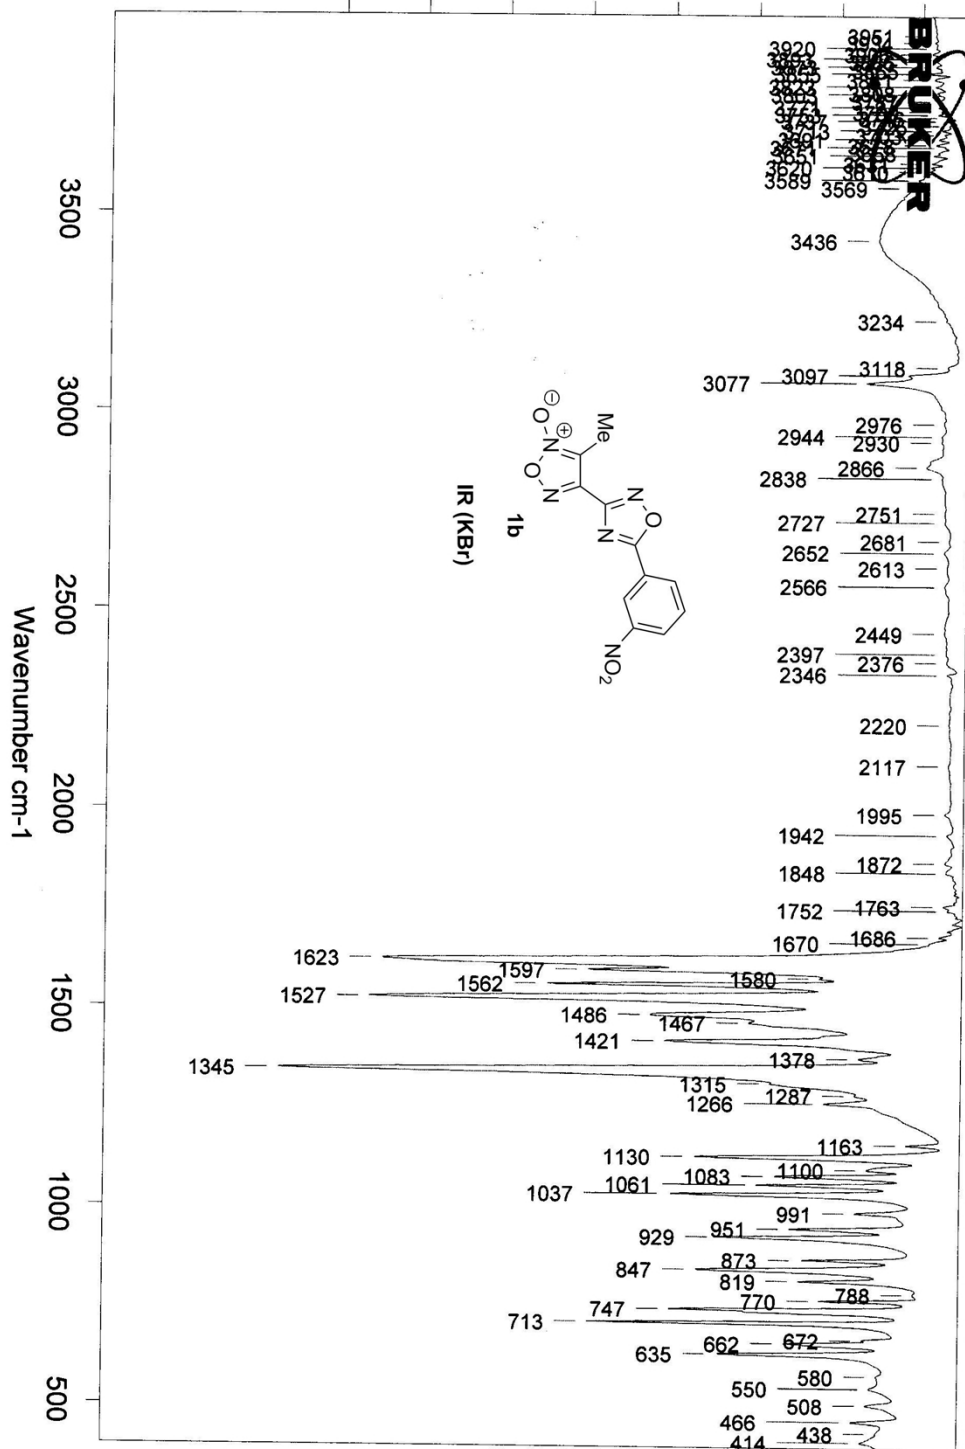

D:\EDL\LEO-726.0

ФЕПУТАТ. LEO-726, пробова с KBr, 0.5/200.

04.12.2014

# /USED 726

© Zelinsky Institute of Organic Chemistry, Moscow; Bruker AM300 SF=300.13 MHz (1H) SI=16K SW=9009.01=2401 PW=9.0 AQ=0.901 RD=3.00 NS=1 SR=-4.12 TF=300K 21 November 2014 Opn: Stuchkova M.I.; Solv: DMSO-d6;

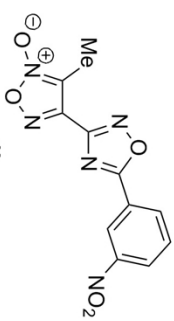

<sup>1</sup>H NMR, 300 MHz, DMSO-d<sub>6</sub>

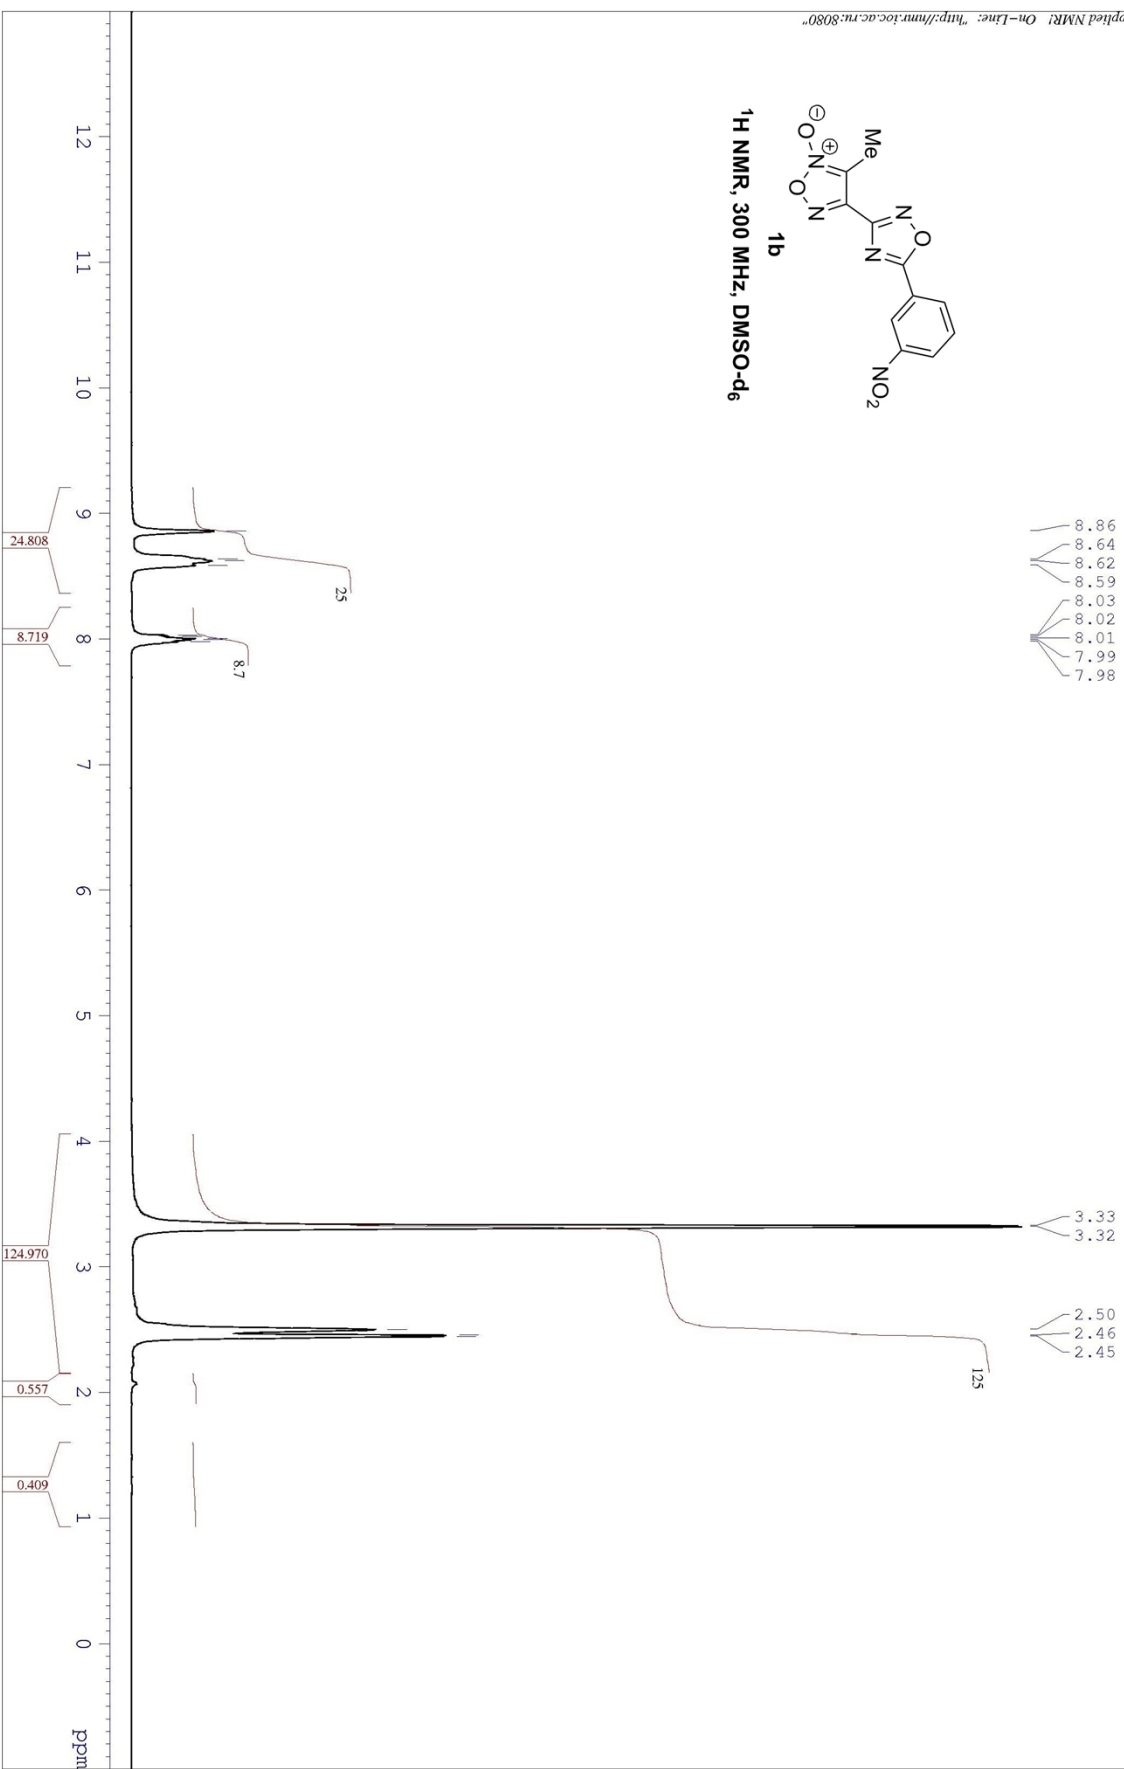



# /USED 726

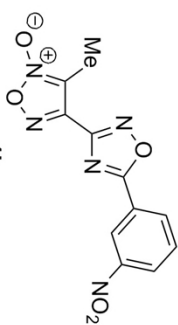

<sup>13</sup>C NMR, 75.5 MHz, DMSO-d<sub>6</sub>

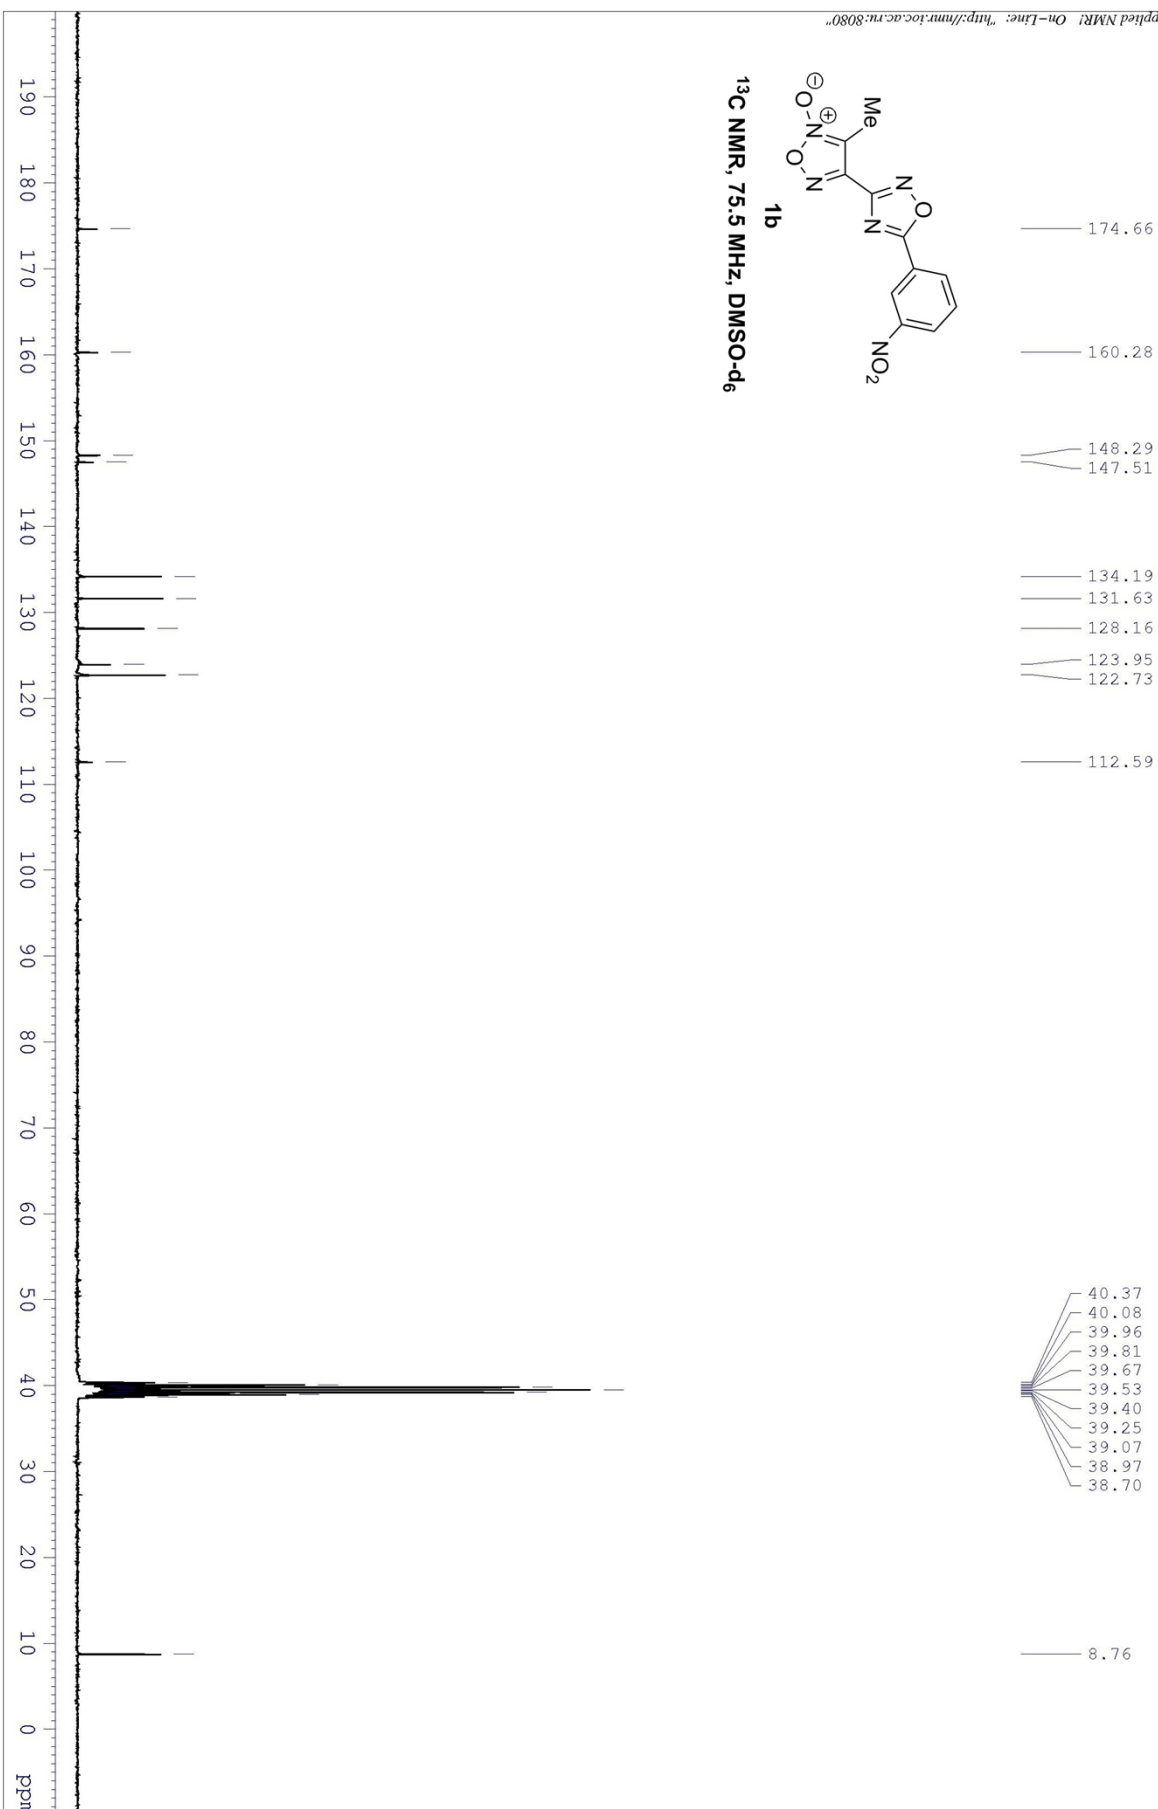

## Display Report

### Analysis Info

Analysis Name D:\Data\Kolotyrkina\2014\Fershtat\1210003.d  
Method tune\_low.m  
Sample Name /USED 726  
Comment C11H7N5O5 mw 289 calibrant added

Acquisition Date 10.12.2014 14:55:31

Operator BDAL@DE  
Instrument / Ser# micrOTOF 10248

### Acquisition Parameter

|             |            |                      |          |                  |           |
|-------------|------------|----------------------|----------|------------------|-----------|
| Source Type | ESI        | Ion Polarity         | Positive | Set Nebulizer    | 0.4 Bar   |
| Focus       | Not active |                      |          | Set Dry Heater   | 180 °C    |
| Scan Begin  | 50 m/z     | Set Capillary        | 4500 V   | Set Dry Gas      | 4.0 l/min |
| Scan End    | 3000 m/z   | Set End Plate Offset | -500 V   | Set Divert Valve | Waste     |

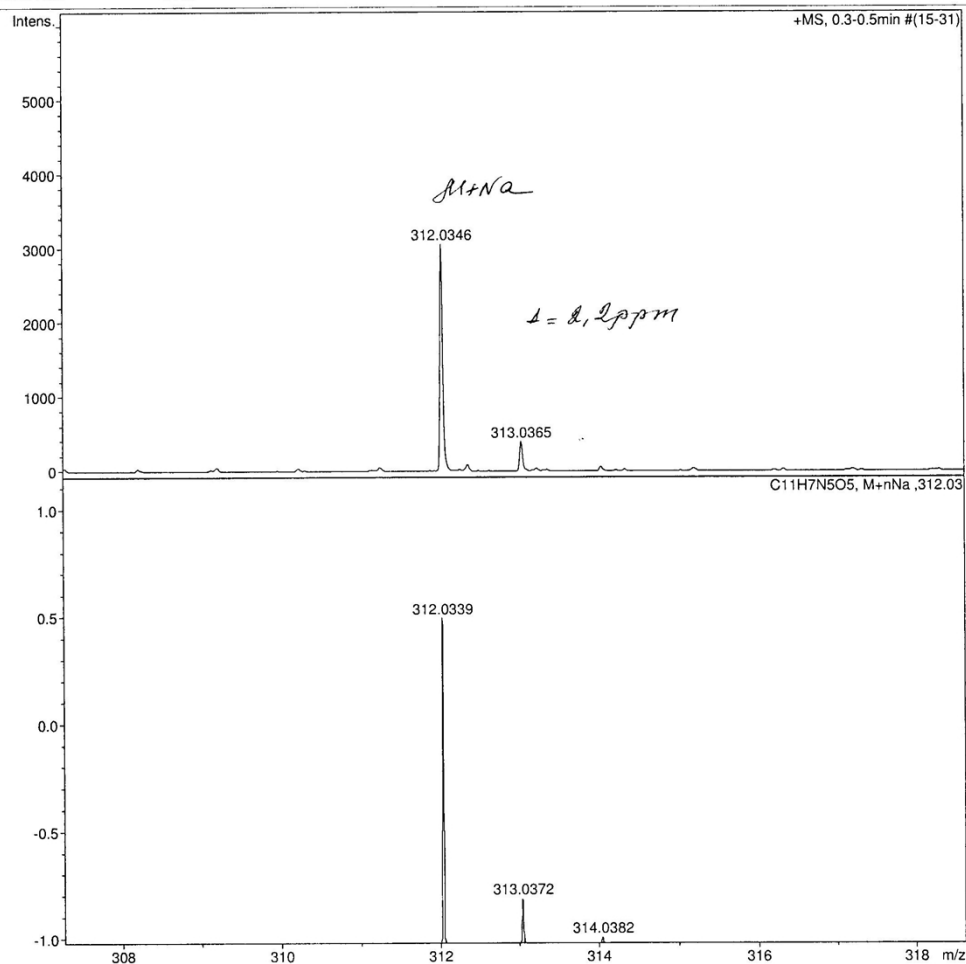

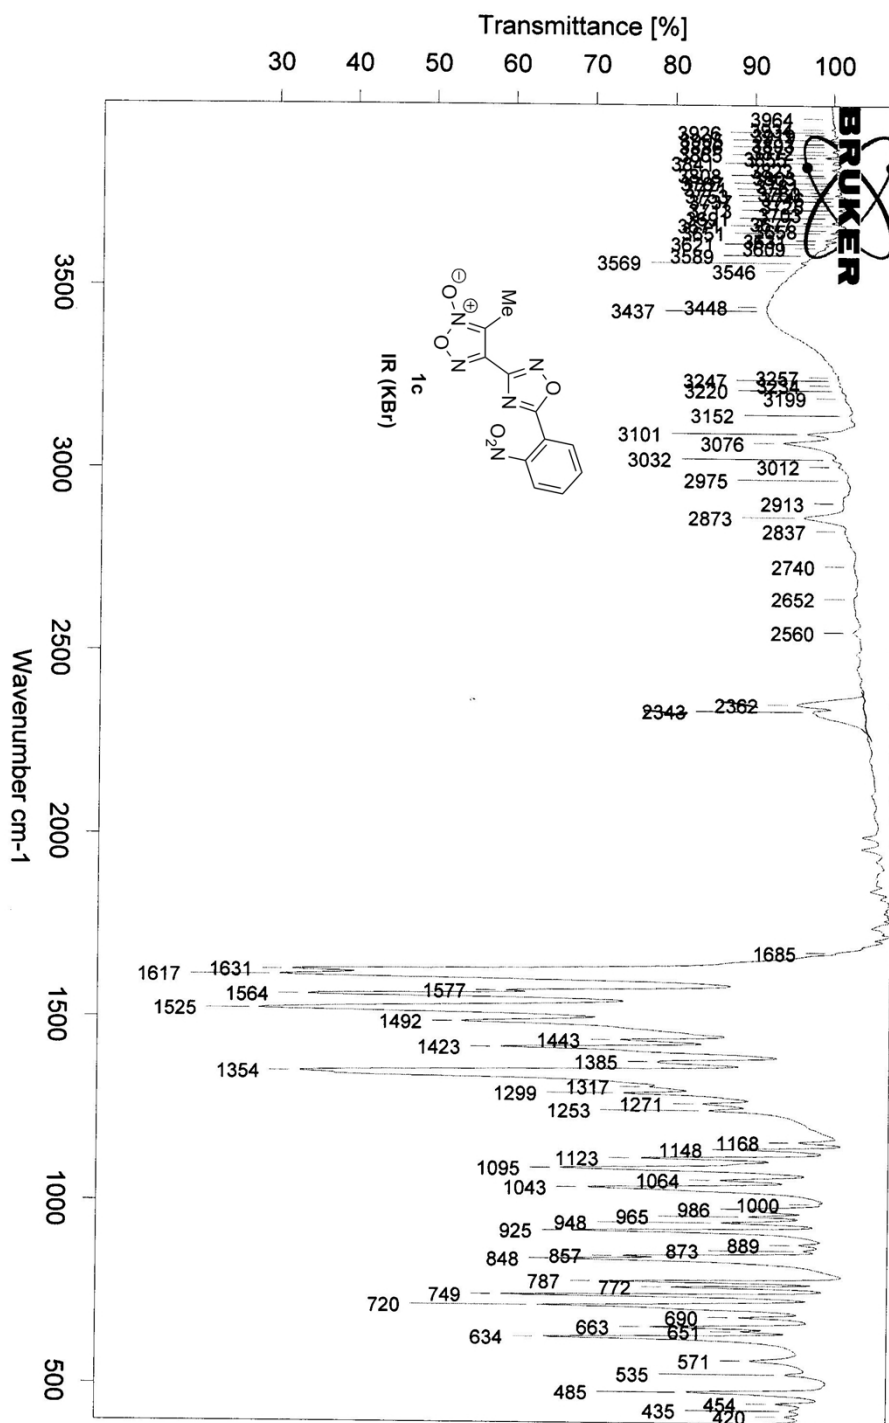

# /USED 753

© Zelinsky Institute of Organic Chemistry, Moscow; Bruker AM300 SF=300.13 MHz (1H) SI=16K SW=6010.01=2401 PW=9.0 AQ=1.351 RD=3.00 NS=1 SR=-1.17 TE=301K 16 December 2014 Op: Struchkova M.I.; Solv: DMSO-d6;  
The Best Applied NMR! On-Line: "http://nmr.toc.ac.ru:8080"

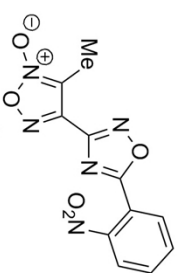

<sup>1</sup>H NMR, 300 MHz, DMSO-d<sub>6</sub>

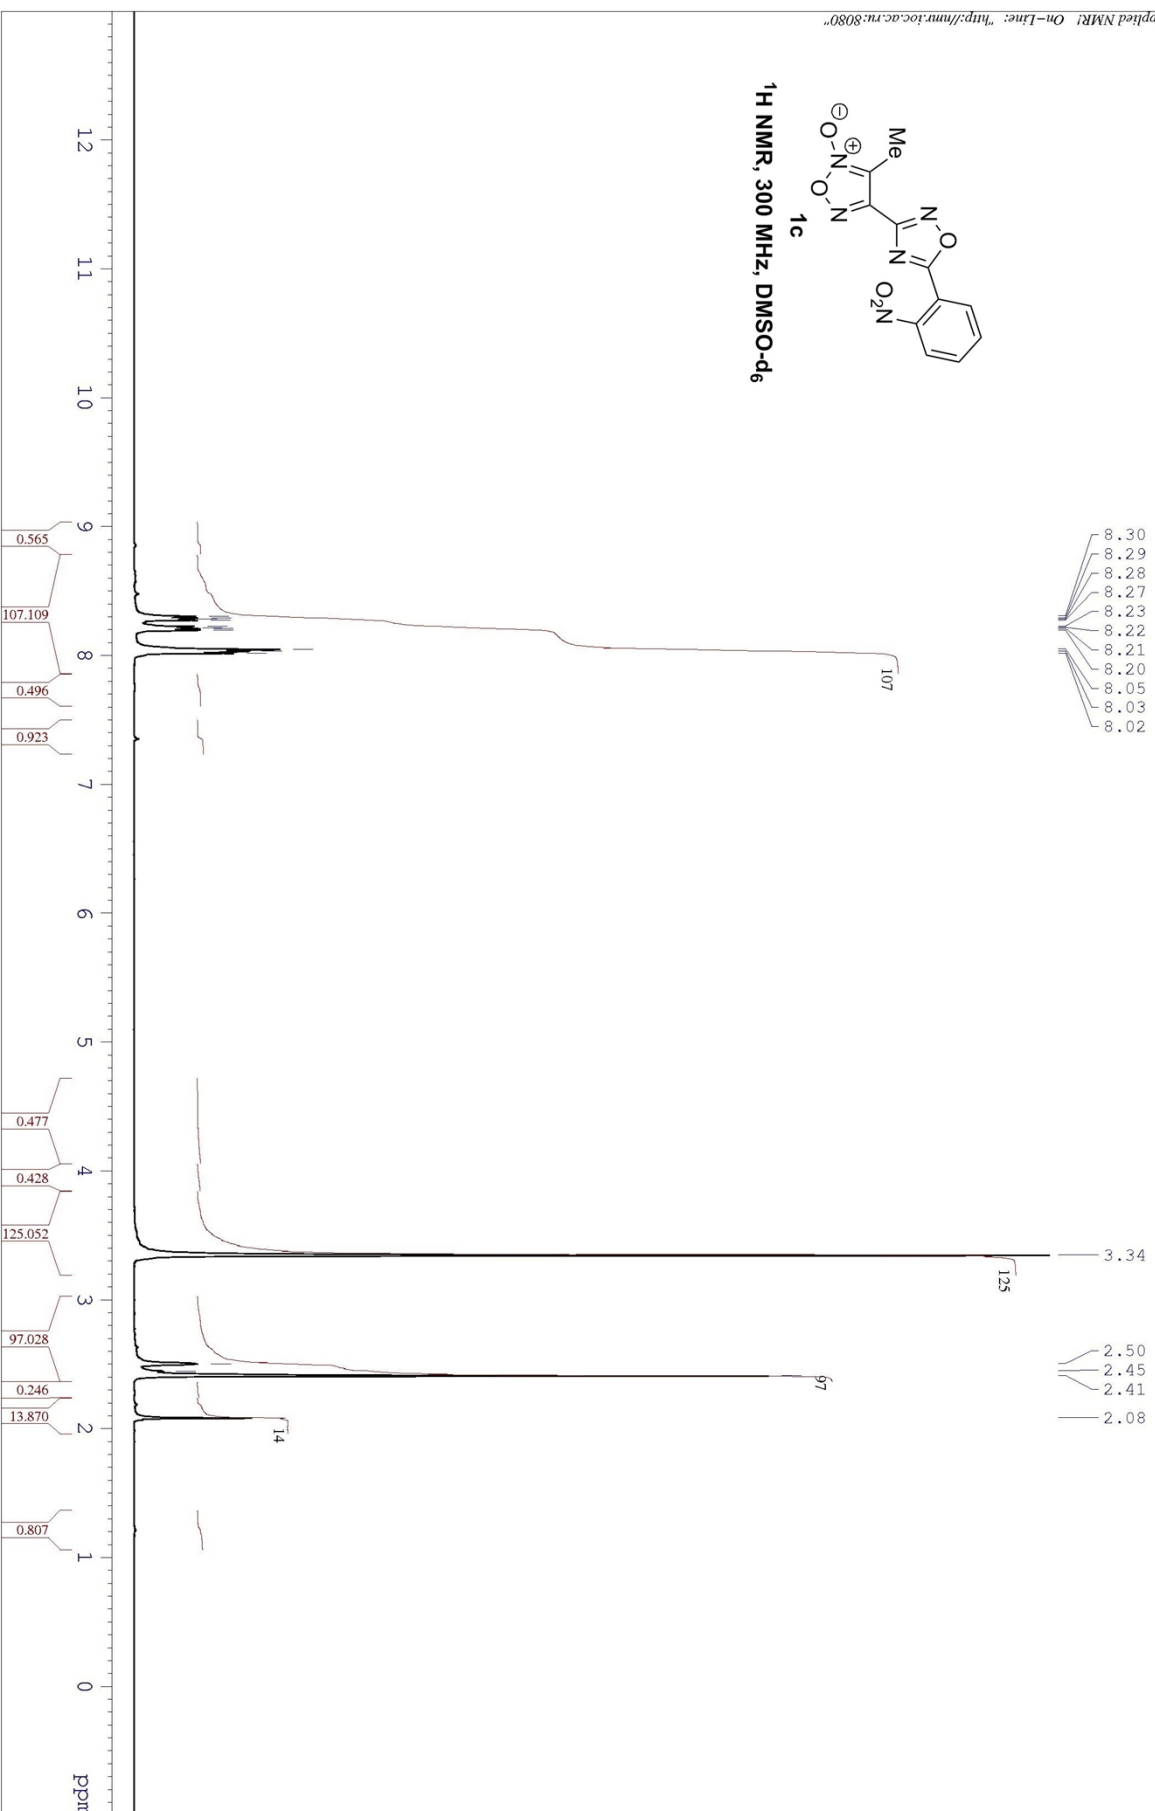

# /USED 753

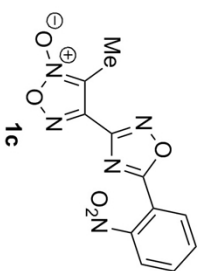

**<sup>13</sup>C NMR, 50 MHz, DMSO-d<sub>6</sub>**

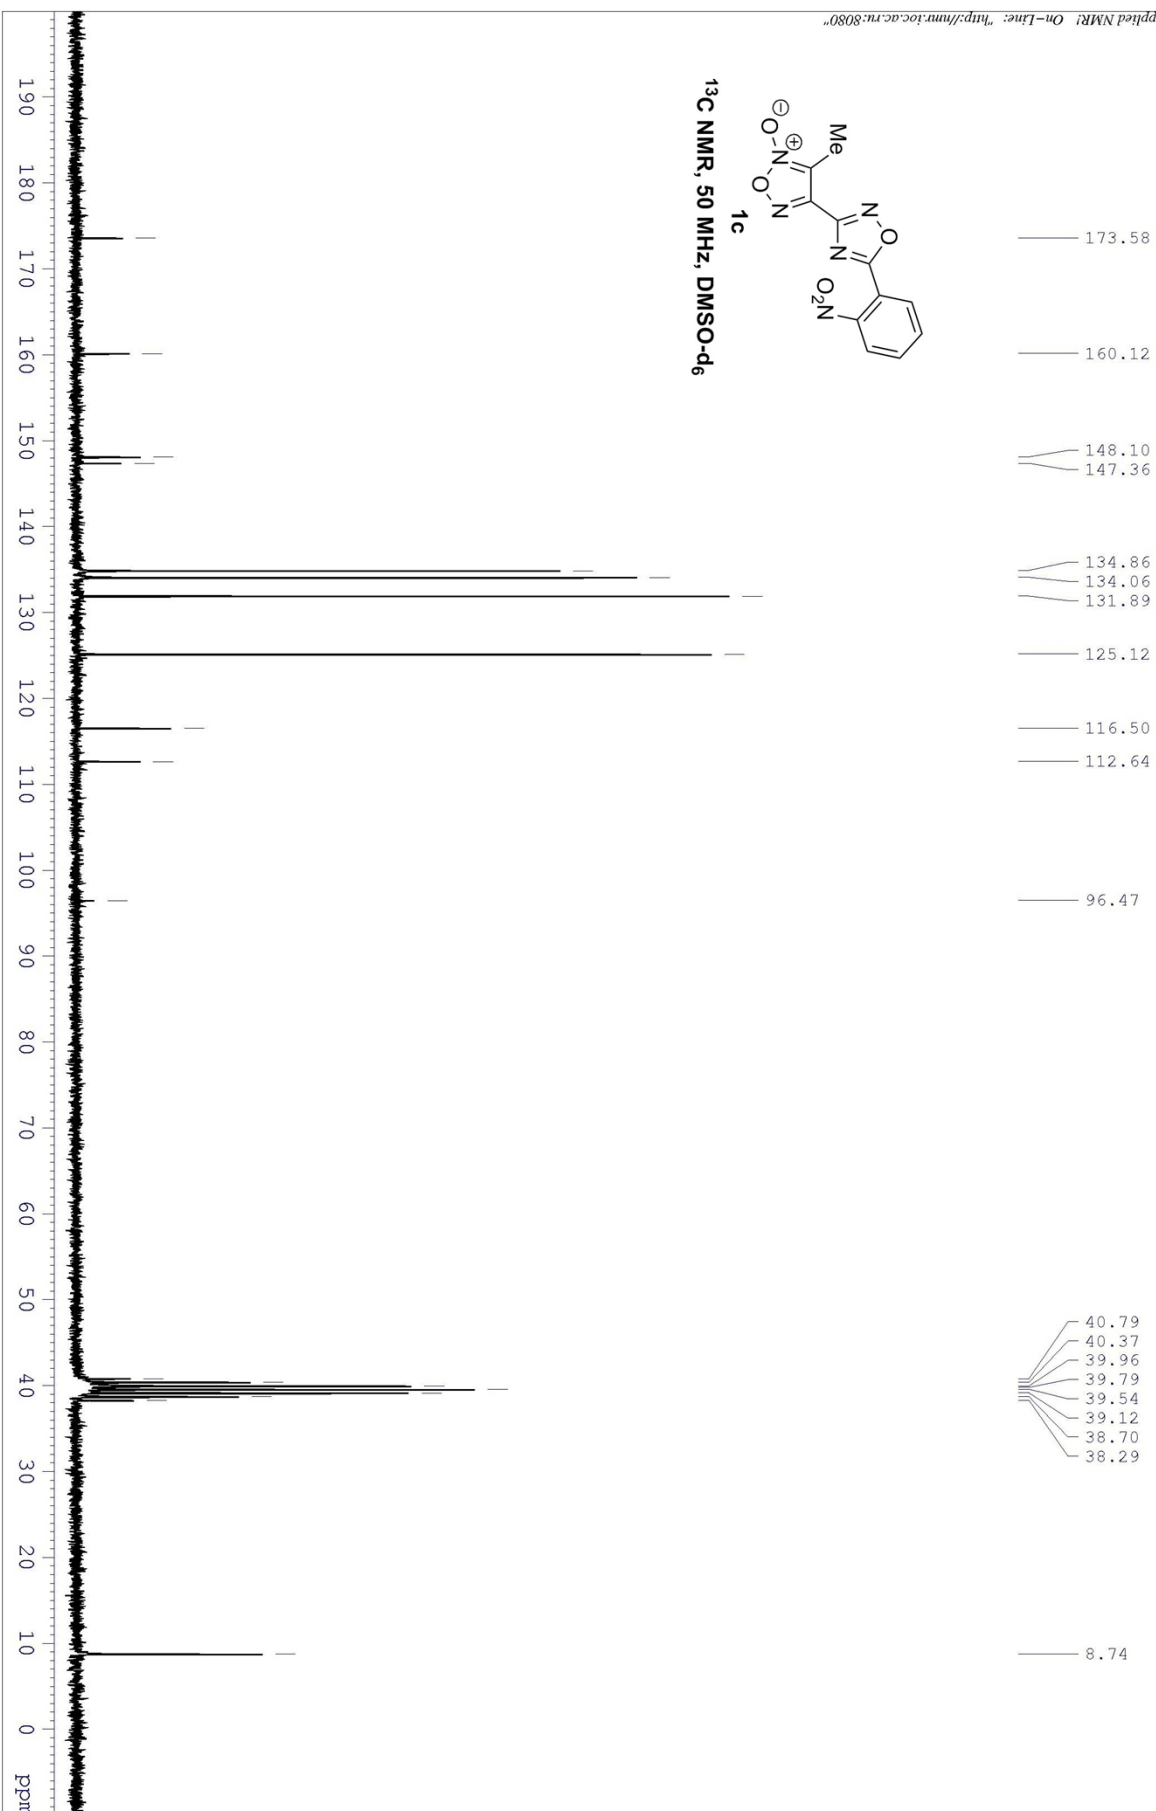

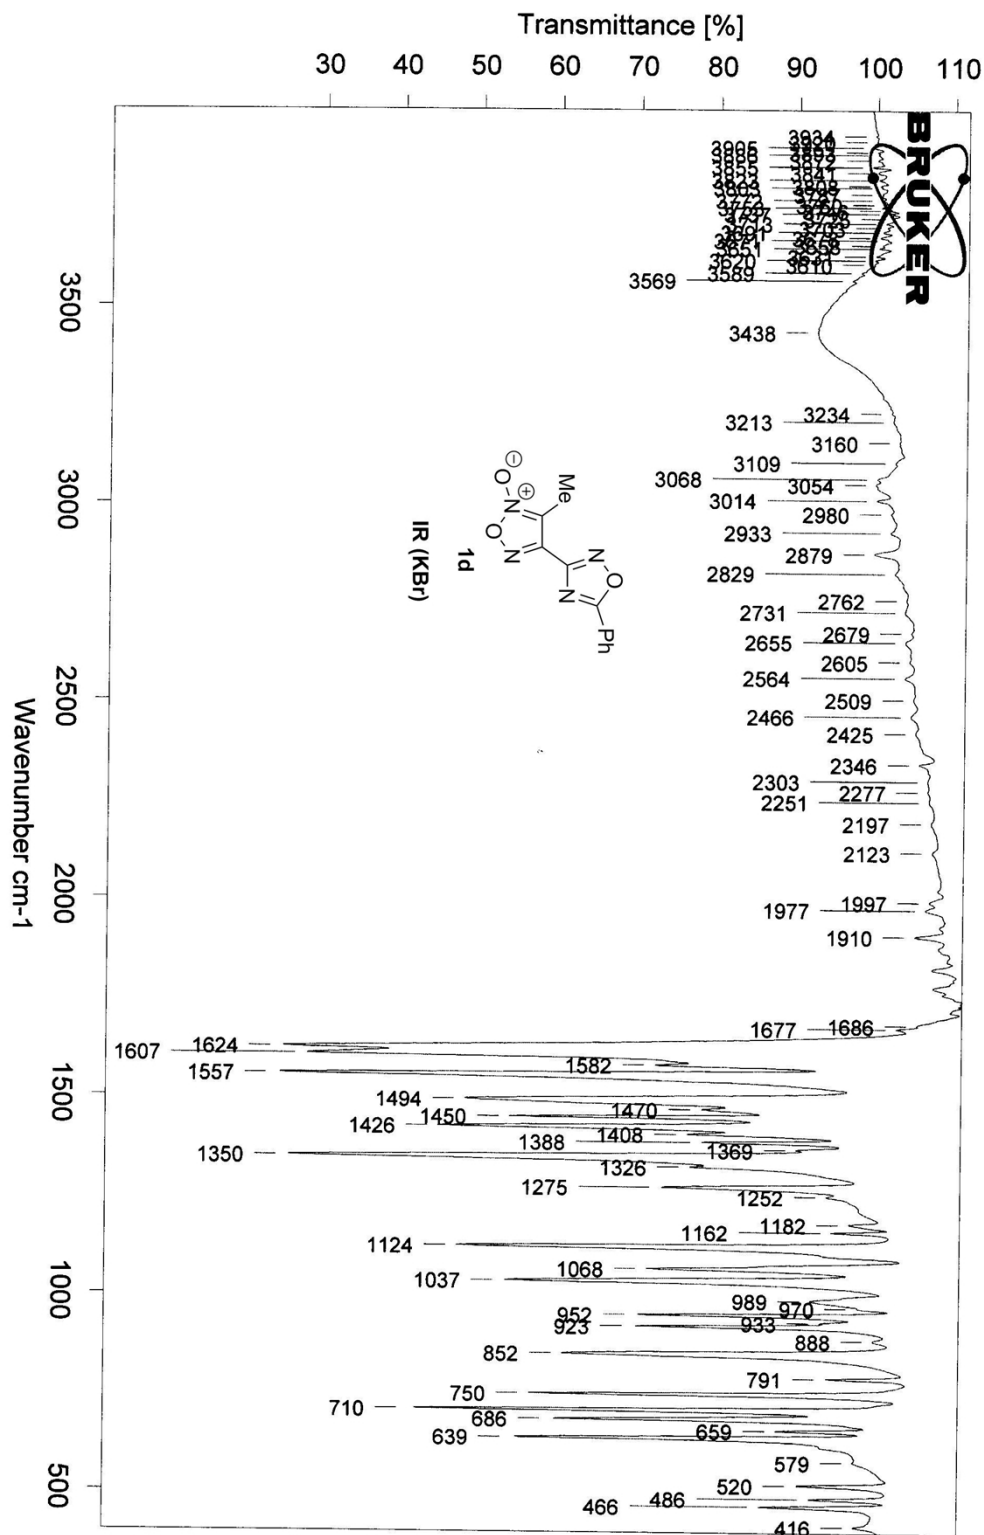

D:\EDL\LEO-705.0

ФЕРИТАТ. LEO-705, пресовка с KBr. 1/200.

03.12.2014

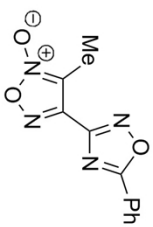

**1d**  
**<sup>1</sup>H NMR, 300 MHz, DMSO-d<sub>6</sub>**

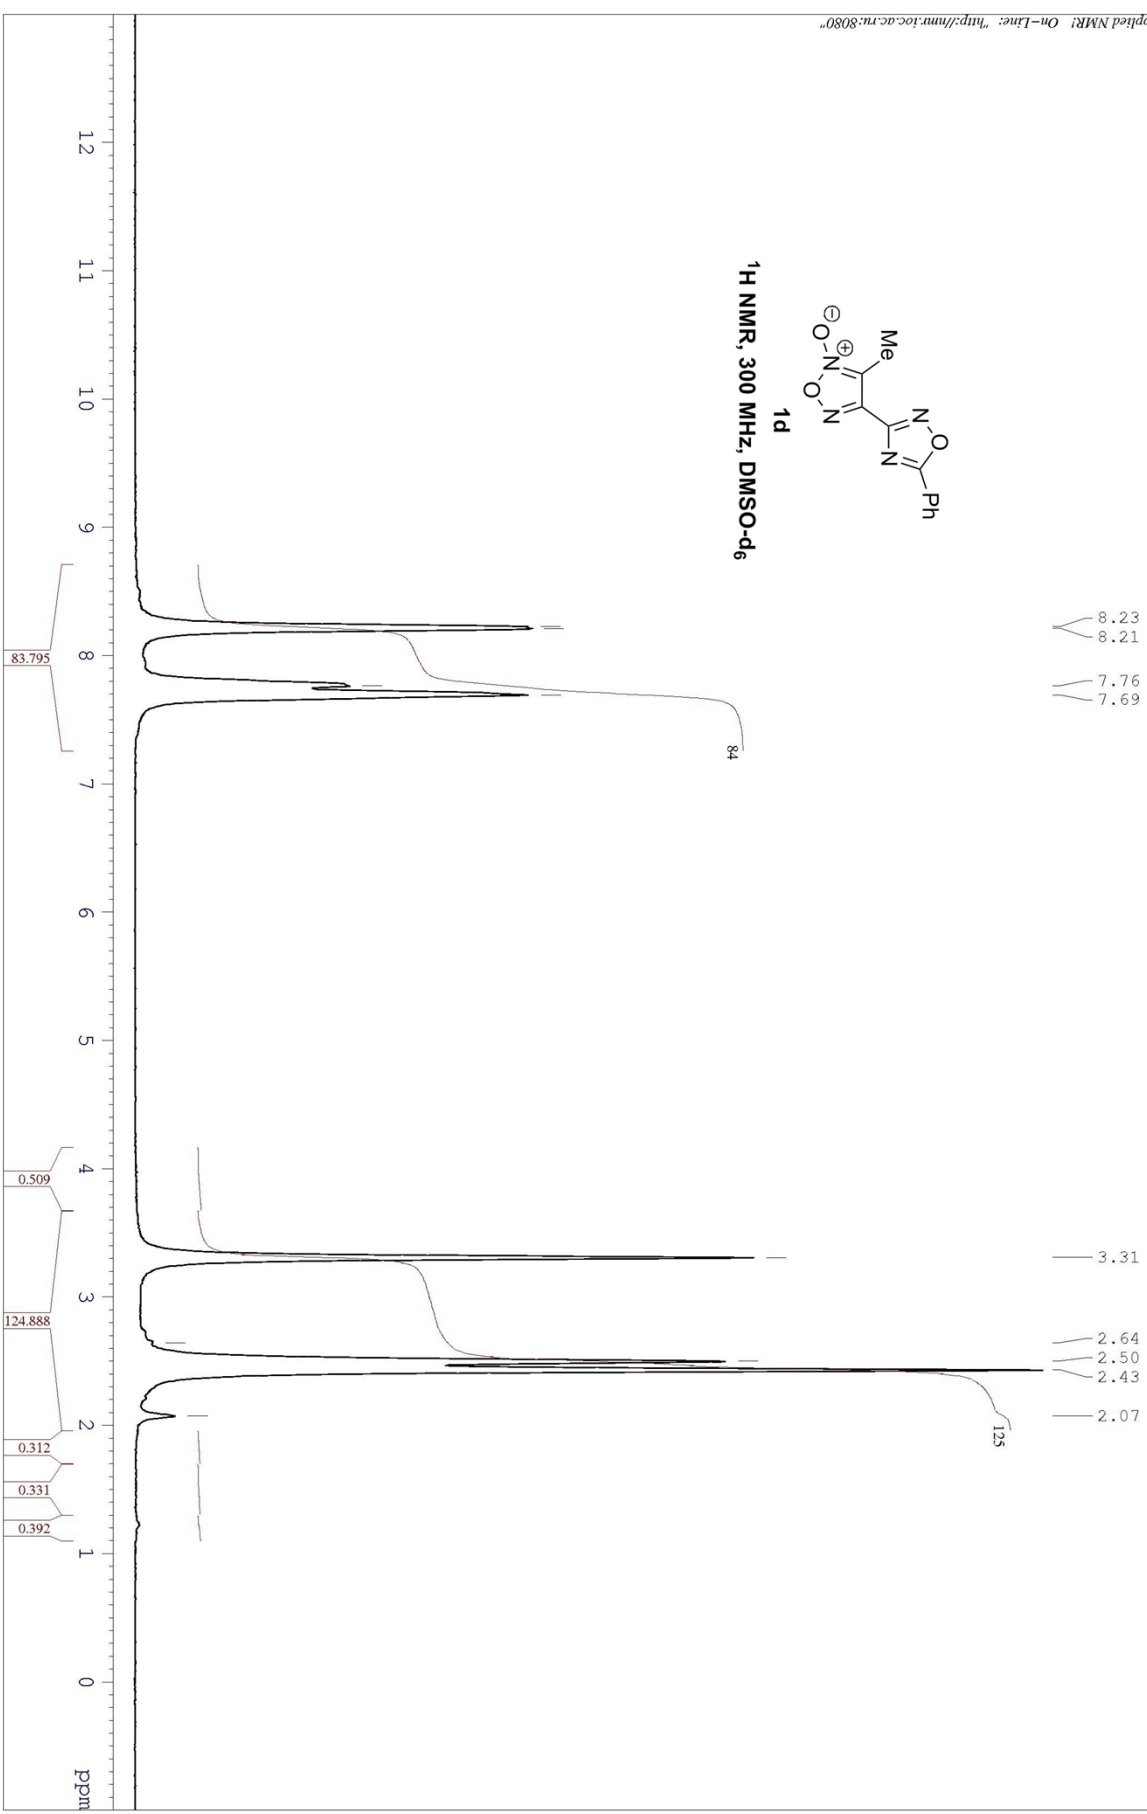

# /USED 705.C13

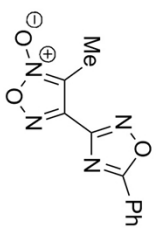

1d

<sup>13</sup>C NMR, 50 MHz, DMSO-d<sub>6</sub>

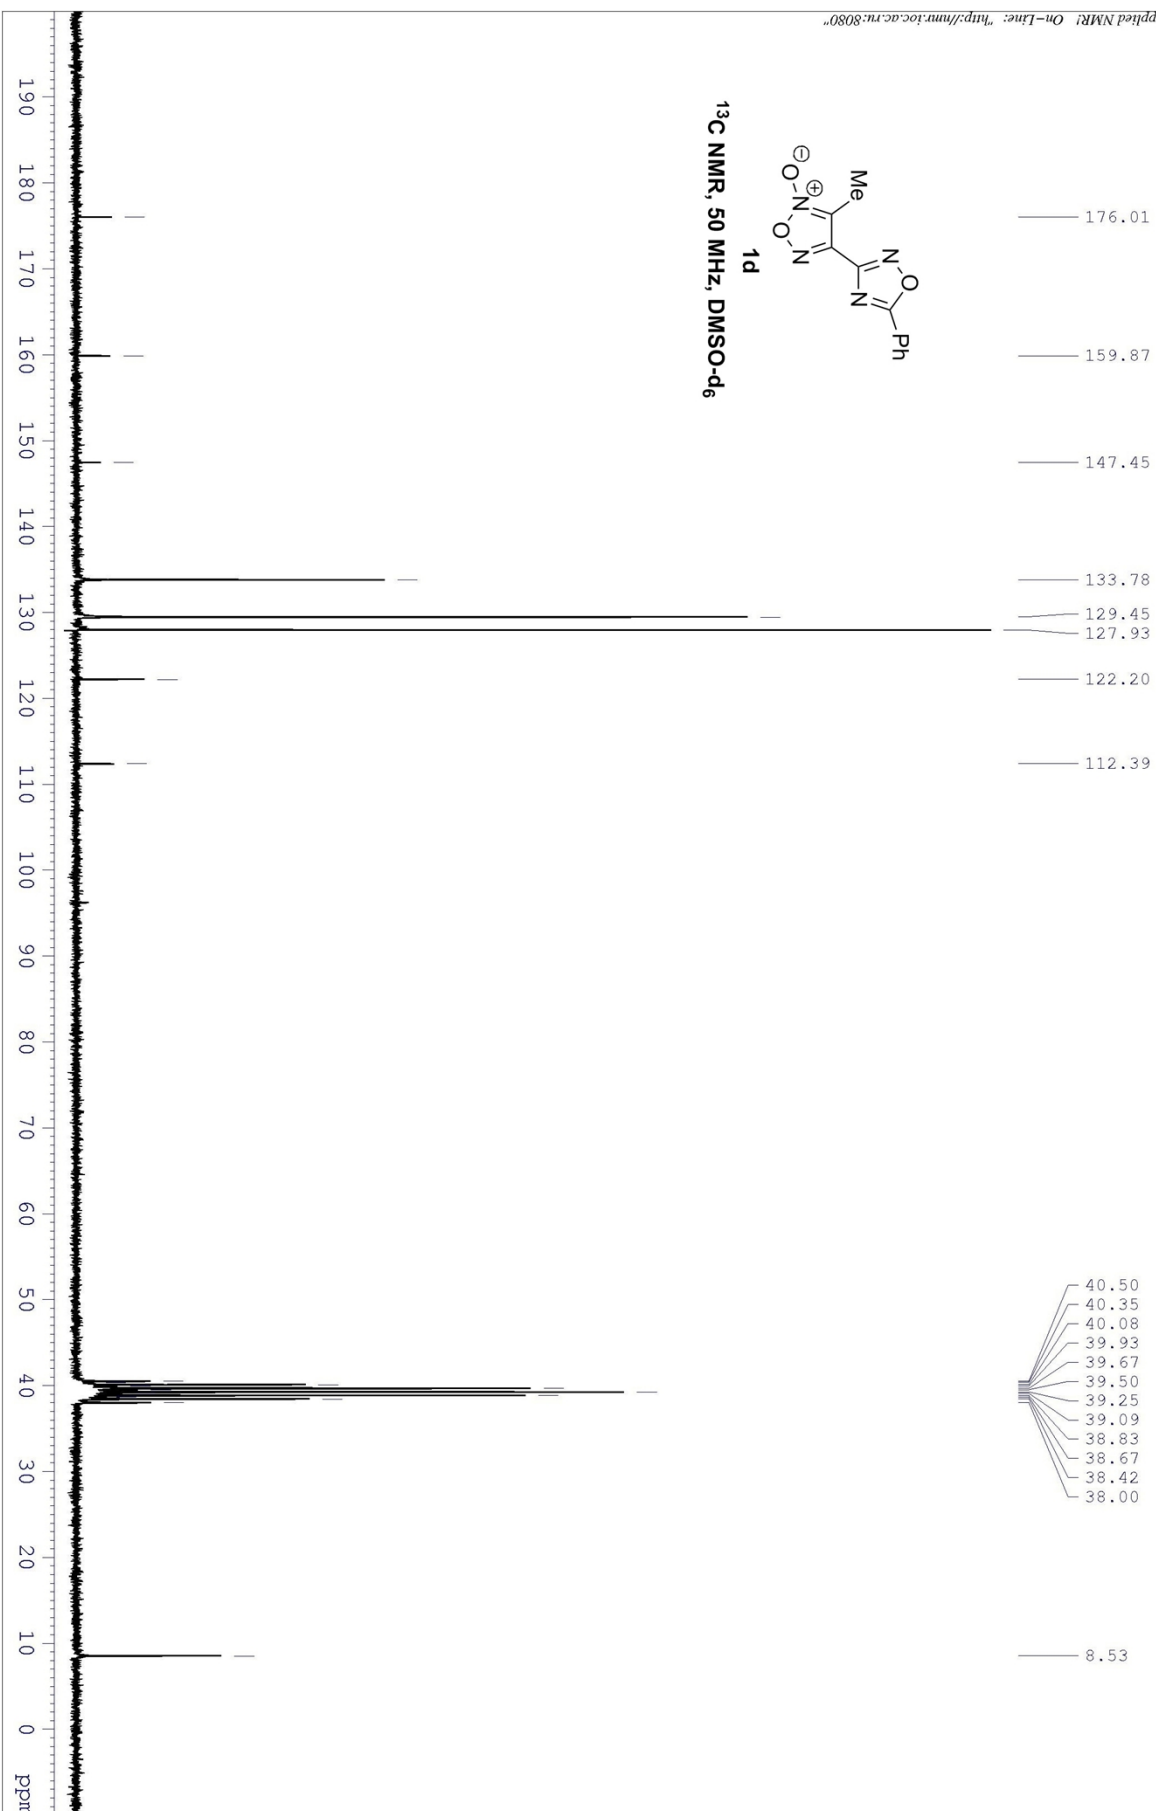



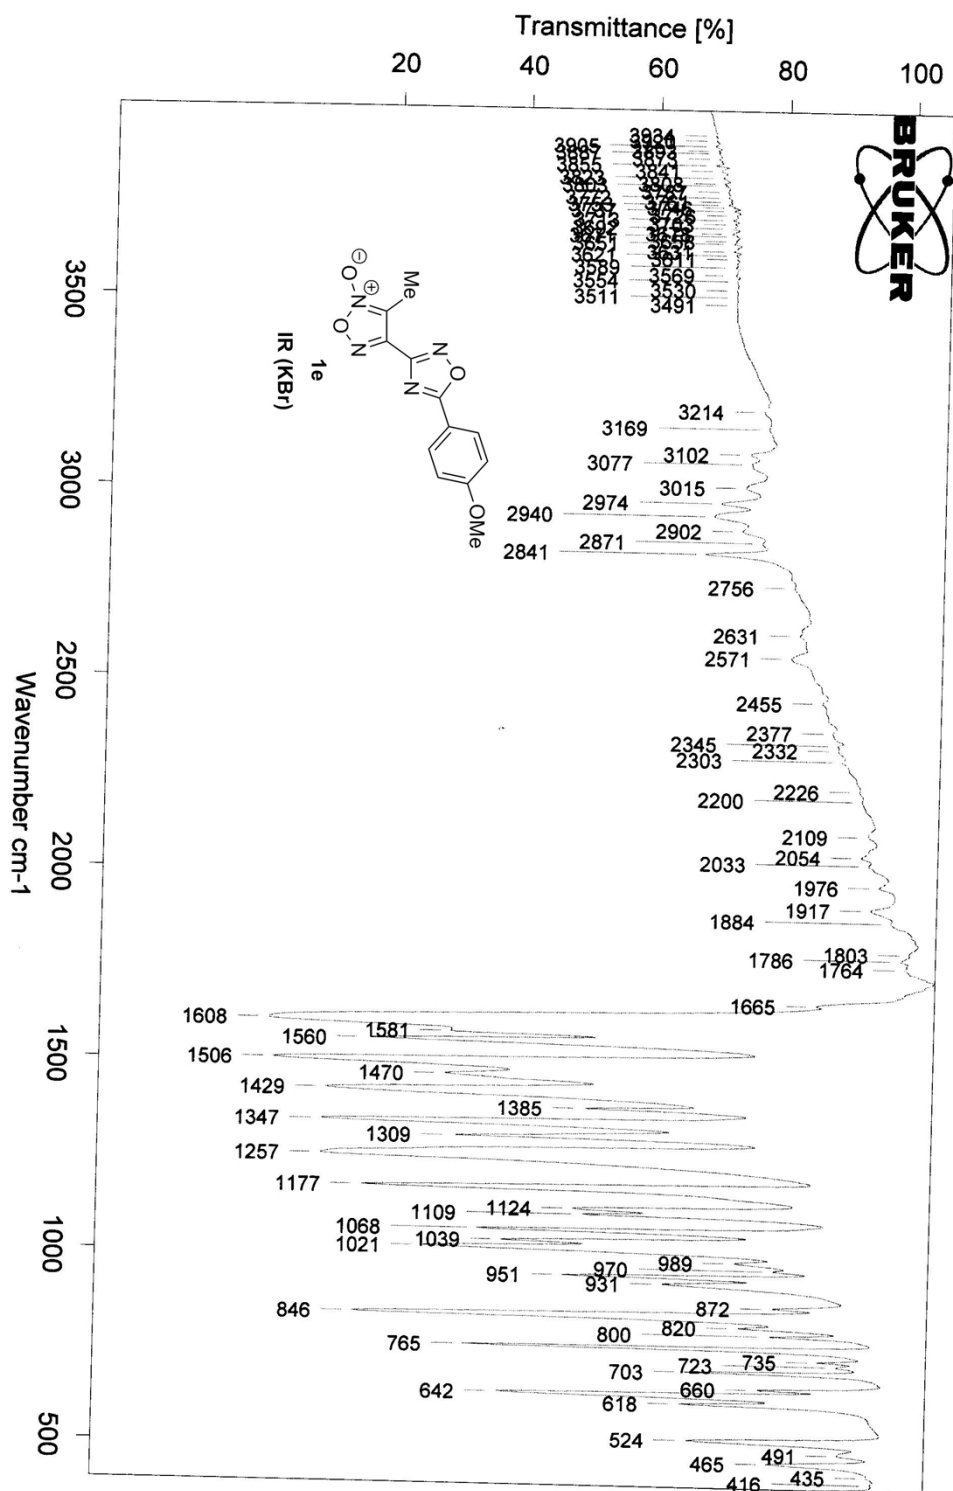

# /USED 760.2

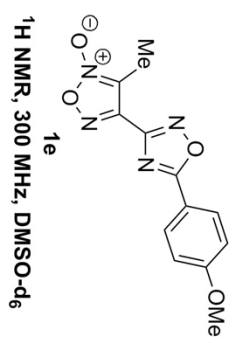

<sup>1</sup>H NMR, 300 MHz, DMSO-d<sub>6</sub>

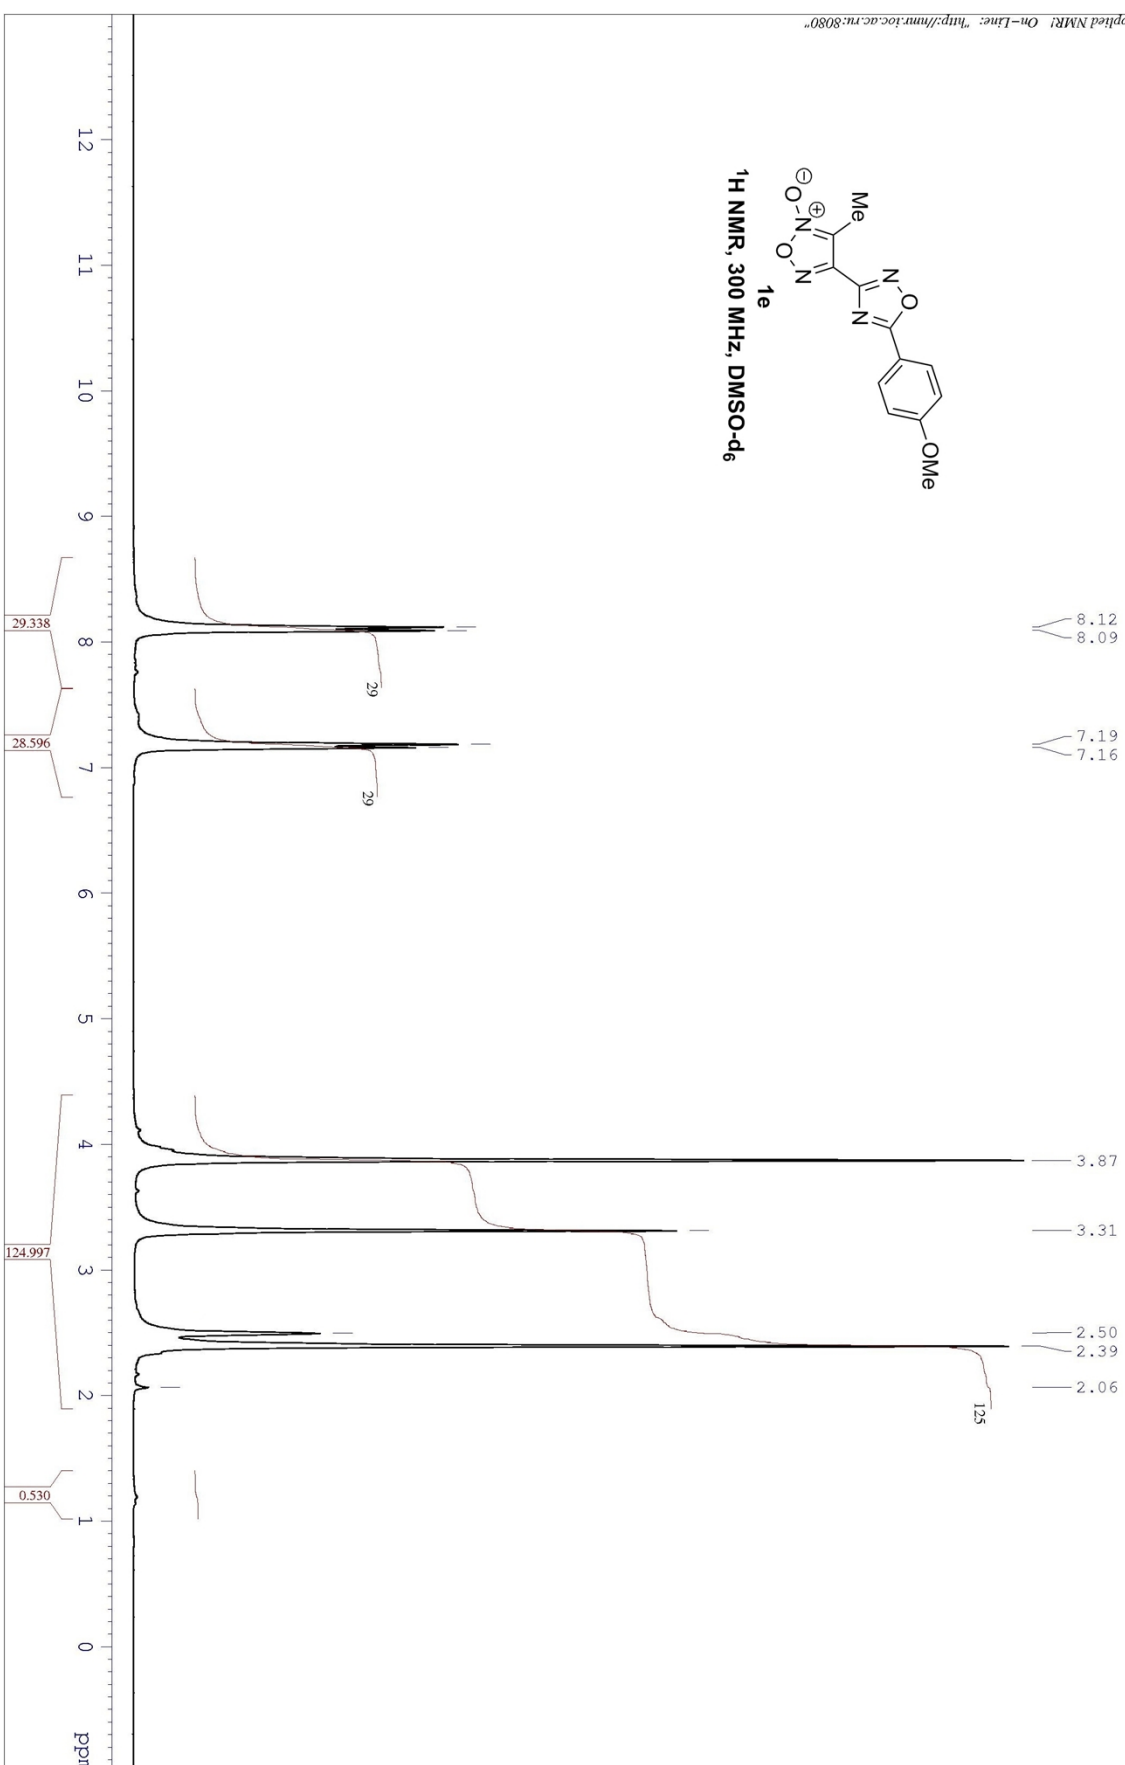

# /USED 760.2

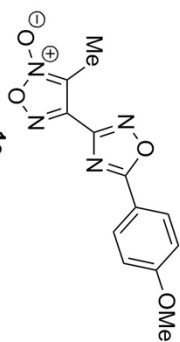

**13C NMR, 75.5 MHz, DMSO-d<sub>6</sub>**

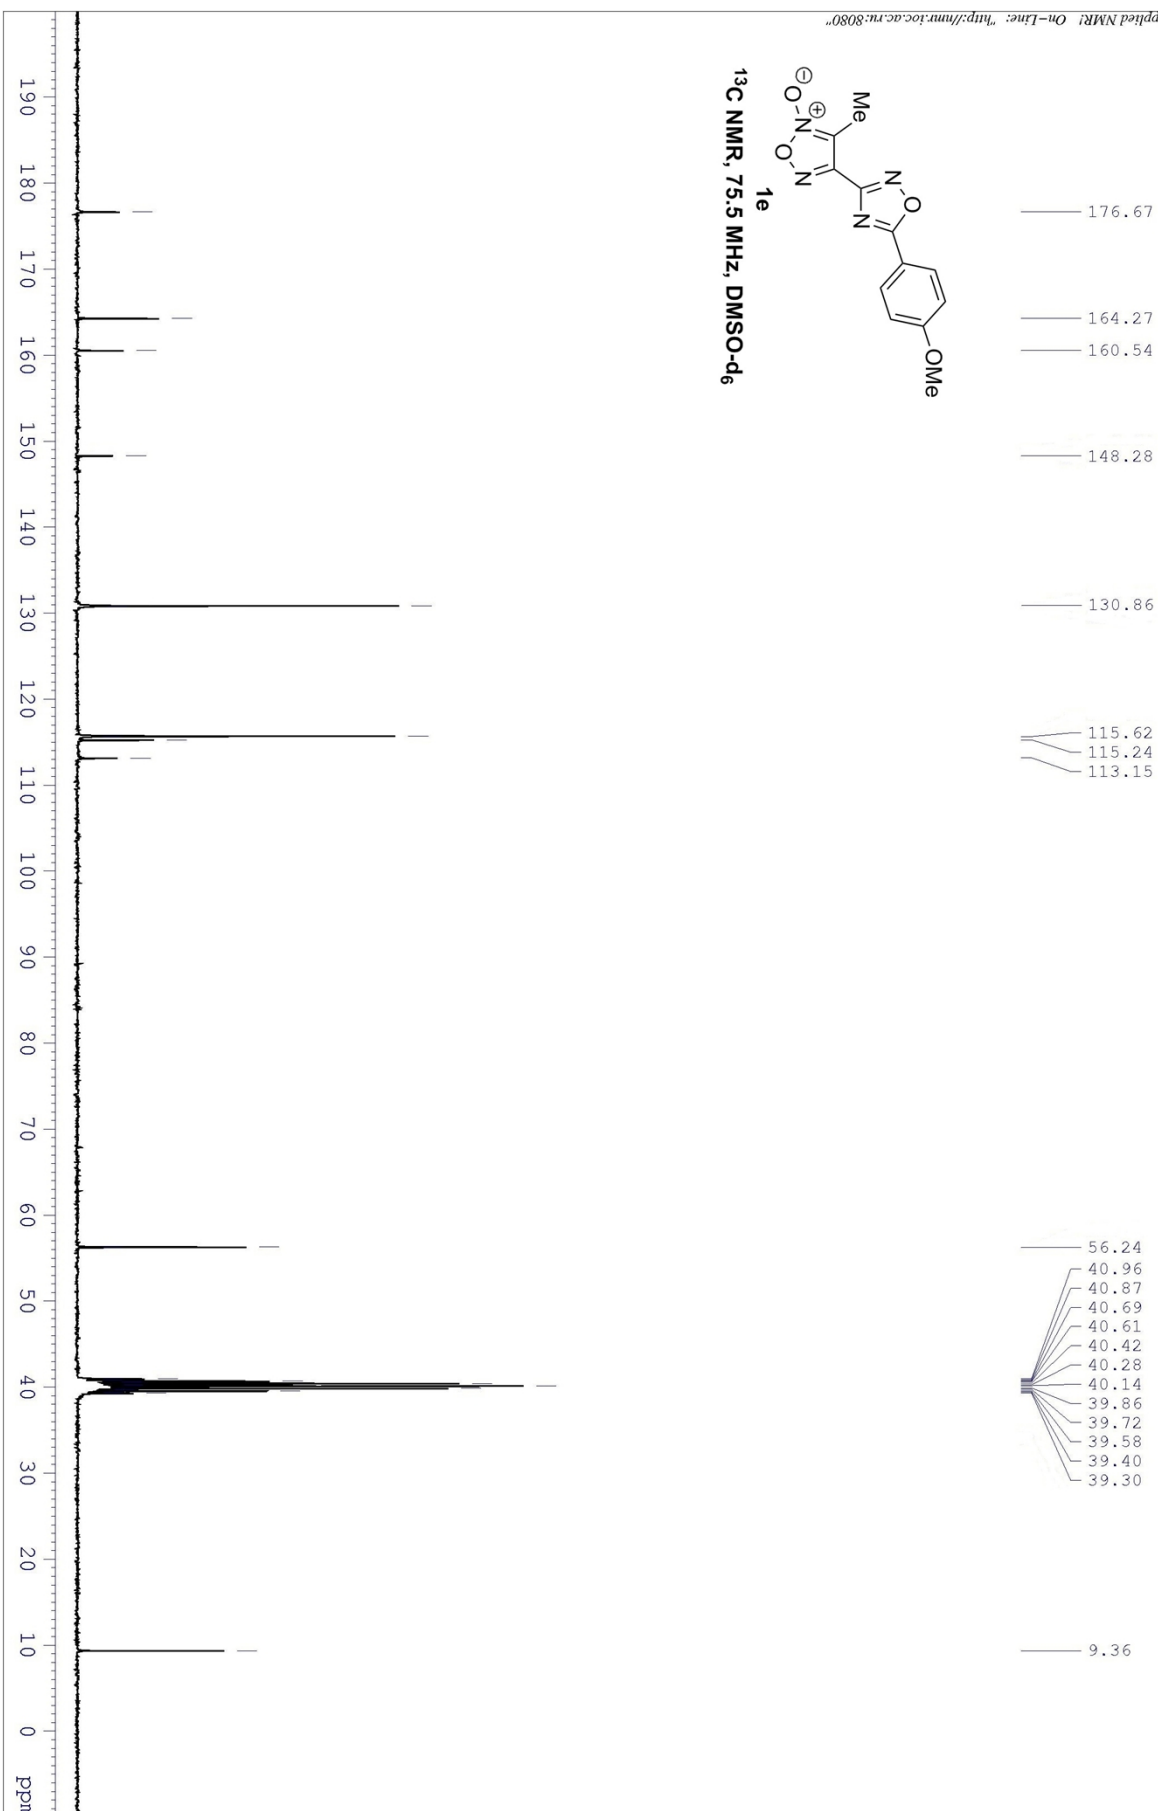

D:\EDU\LEO-744.0

ФЕРУЛАТ. ЛЕО-744, тонкий слой, пл. КВ.

03.03.2015

Page 1/1

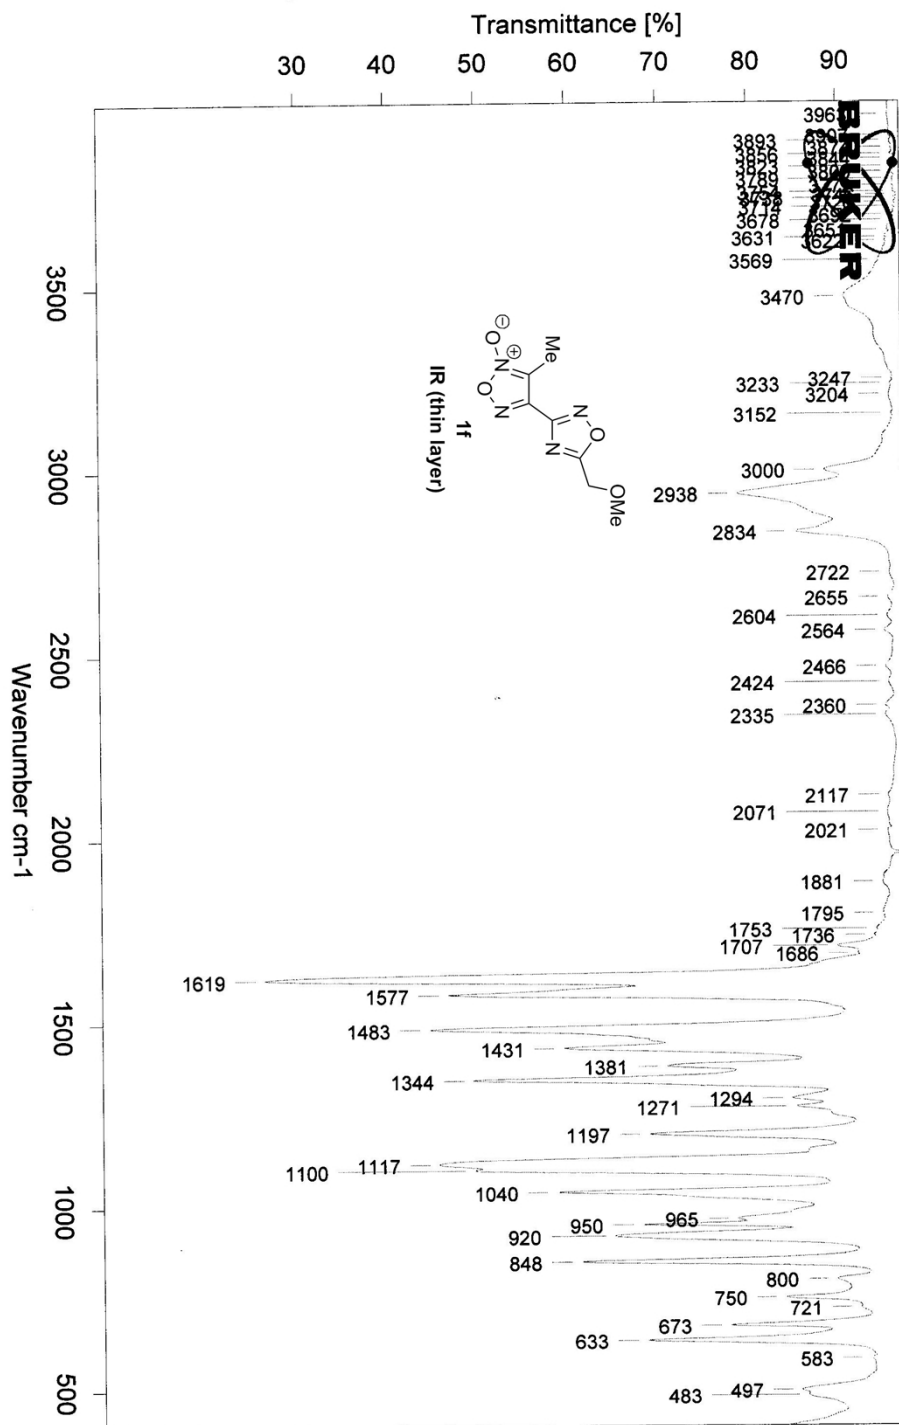

/USED 744

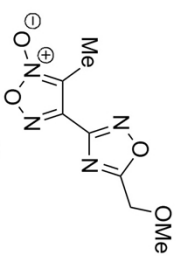

<sup>1</sup>H NMR, 200 MHz, CDCl<sub>3</sub>

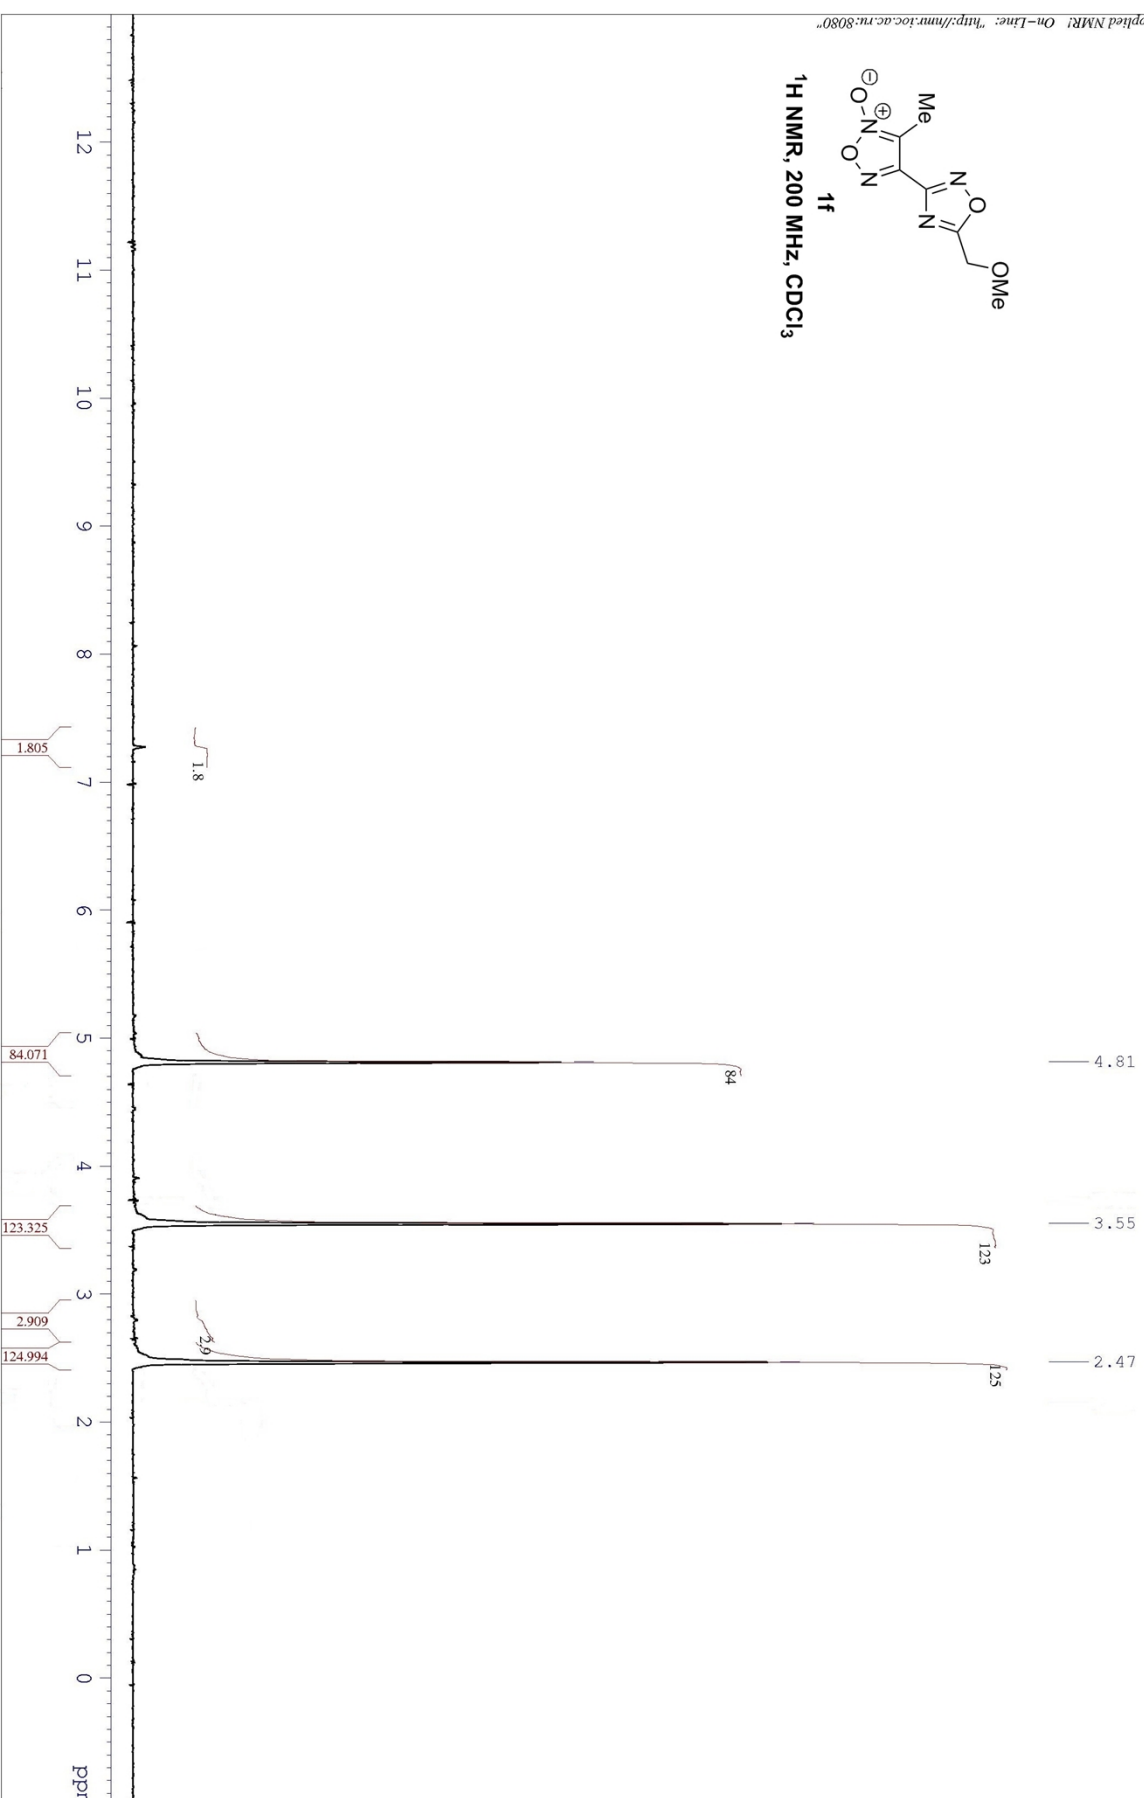

/USED 744.C13

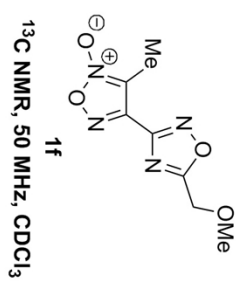

<sup>13</sup>C NMR, 50 MHz, CDCl<sub>3</sub>

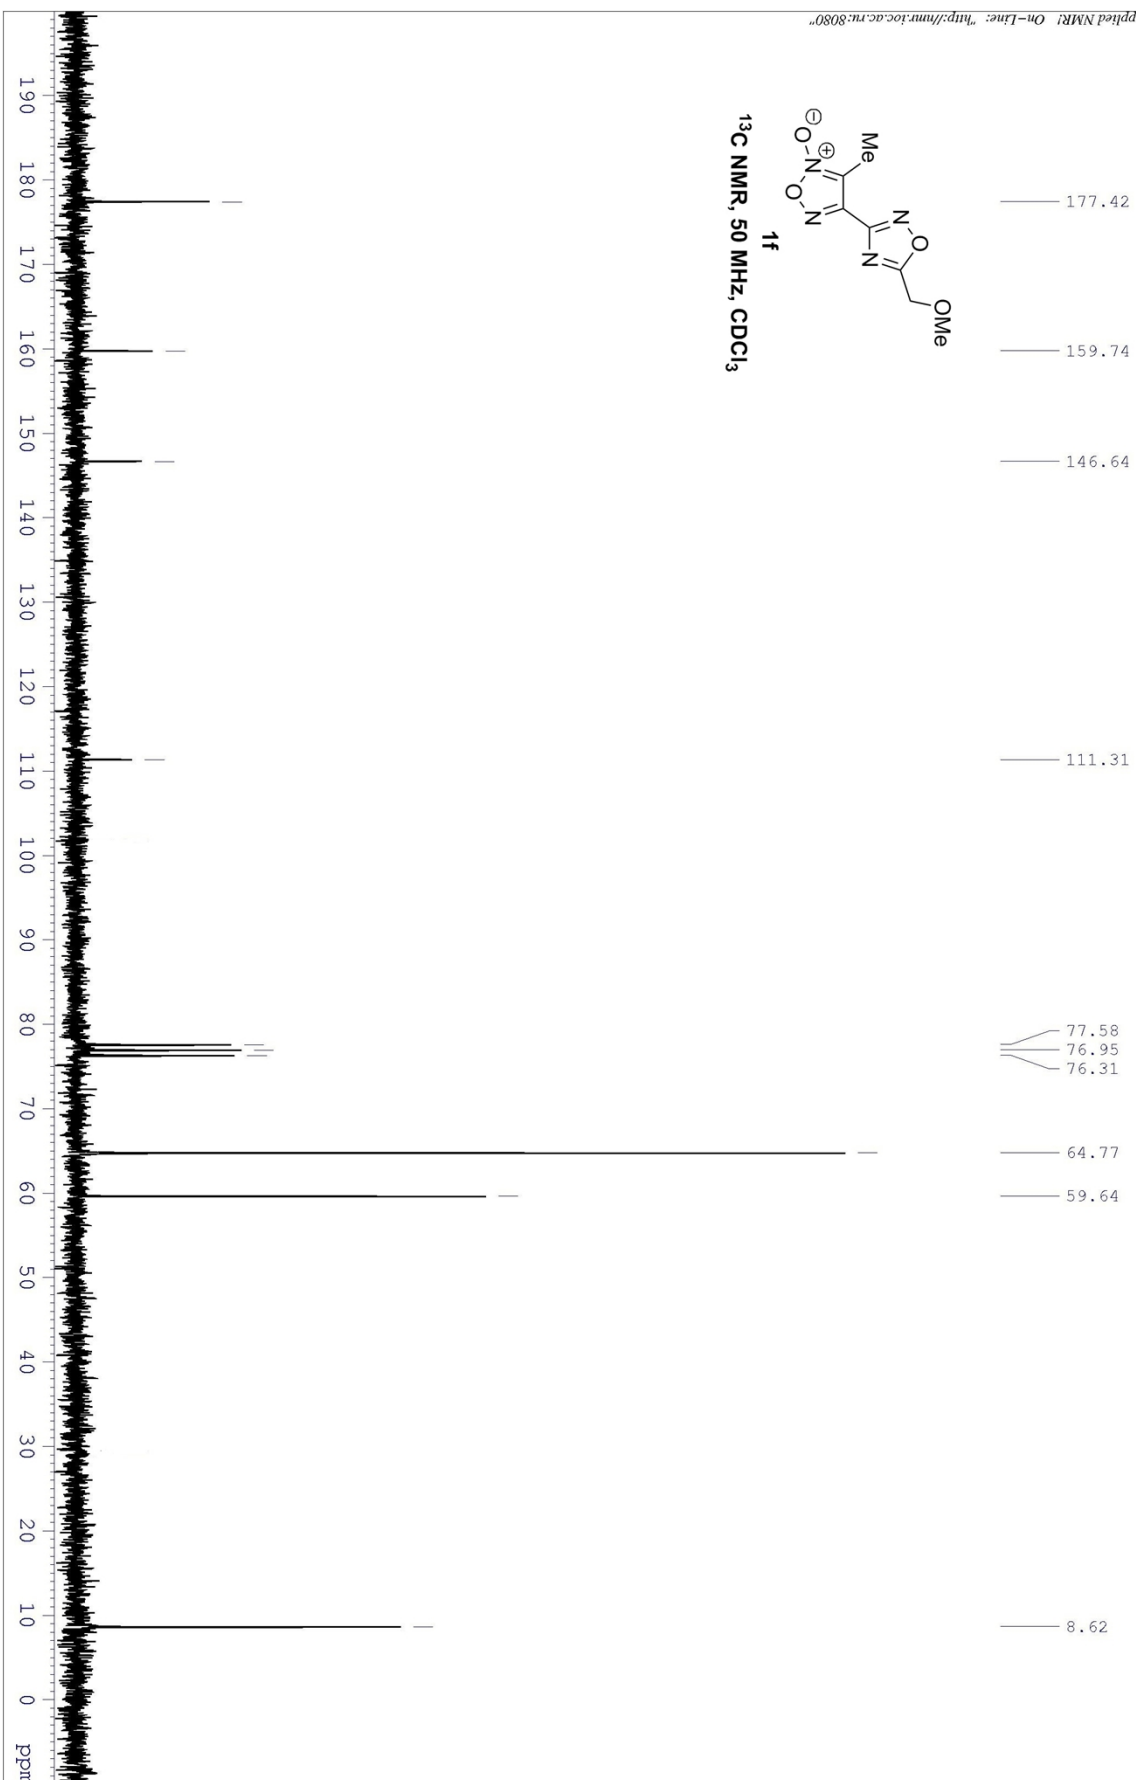

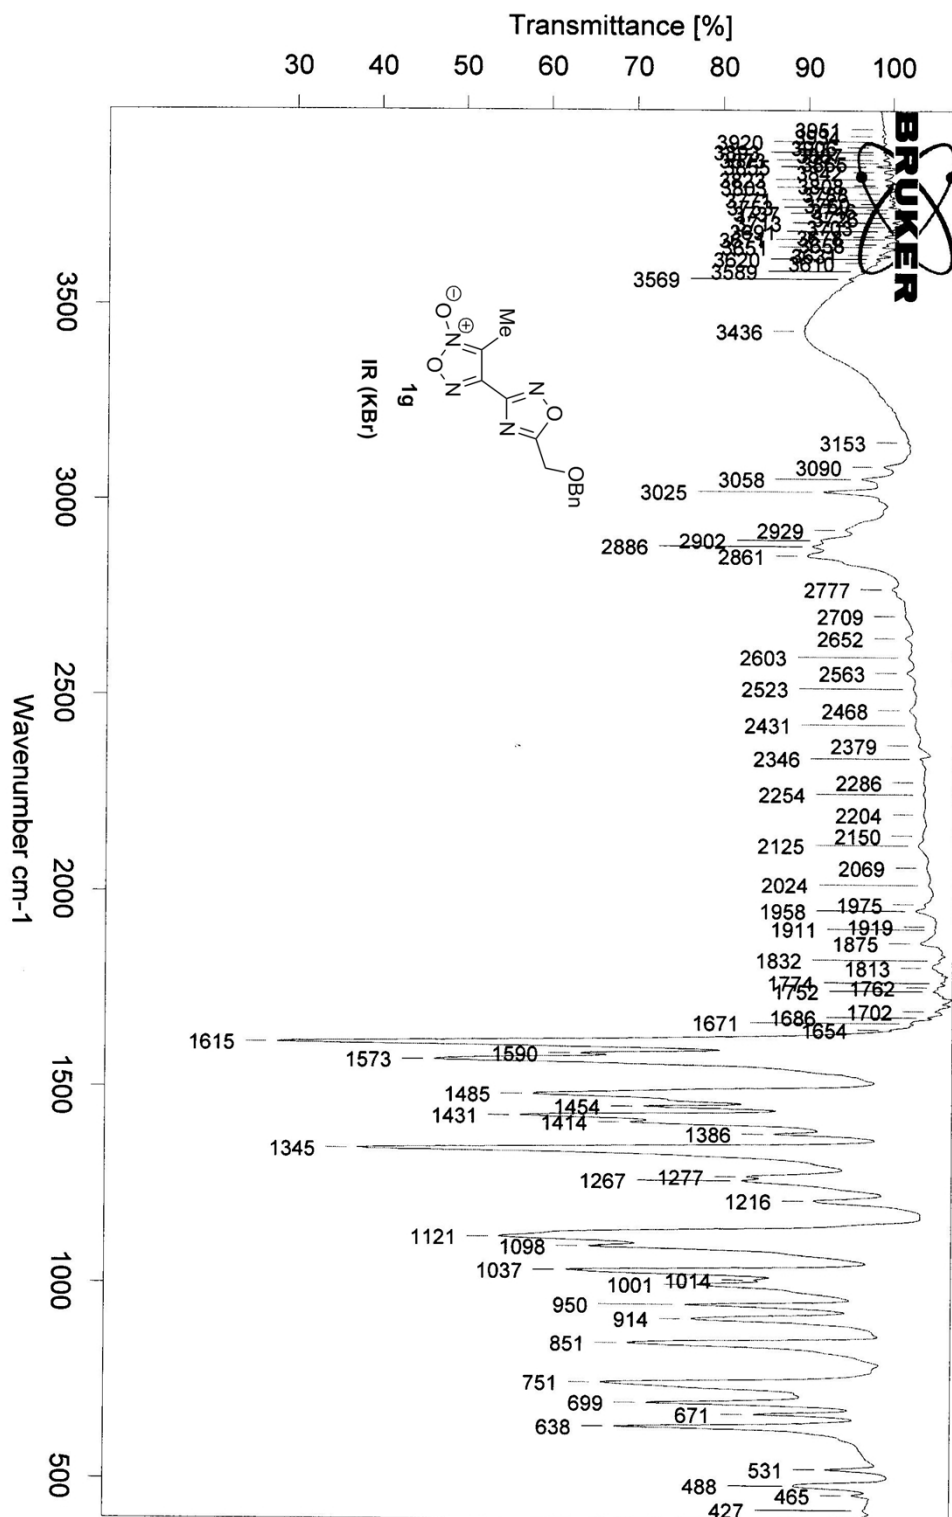

D:\ED\LEO-736.0

ФЕРИТАТ. LEO-736 , прессовка с KBr, 1/200.

10.12.2014

/USED 736

© Zelinsky Institute of Organic Chemistry, Moscow; Bruker AC200 SF=200.13 MHz (1H) SI=16K SW=4000 OI=3939 PW=6.0 AQ=2.048 RD=3.00 NS=32 SR=2338.00 TE=297K 26 November 2014 Op: Struchkova M.I.; Solv: CDCl3;

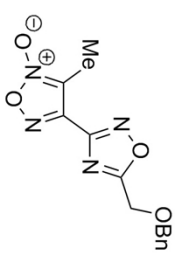

**1g**  
<sup>1</sup>H NMR, 200 MHz, CDCl<sub>3</sub>

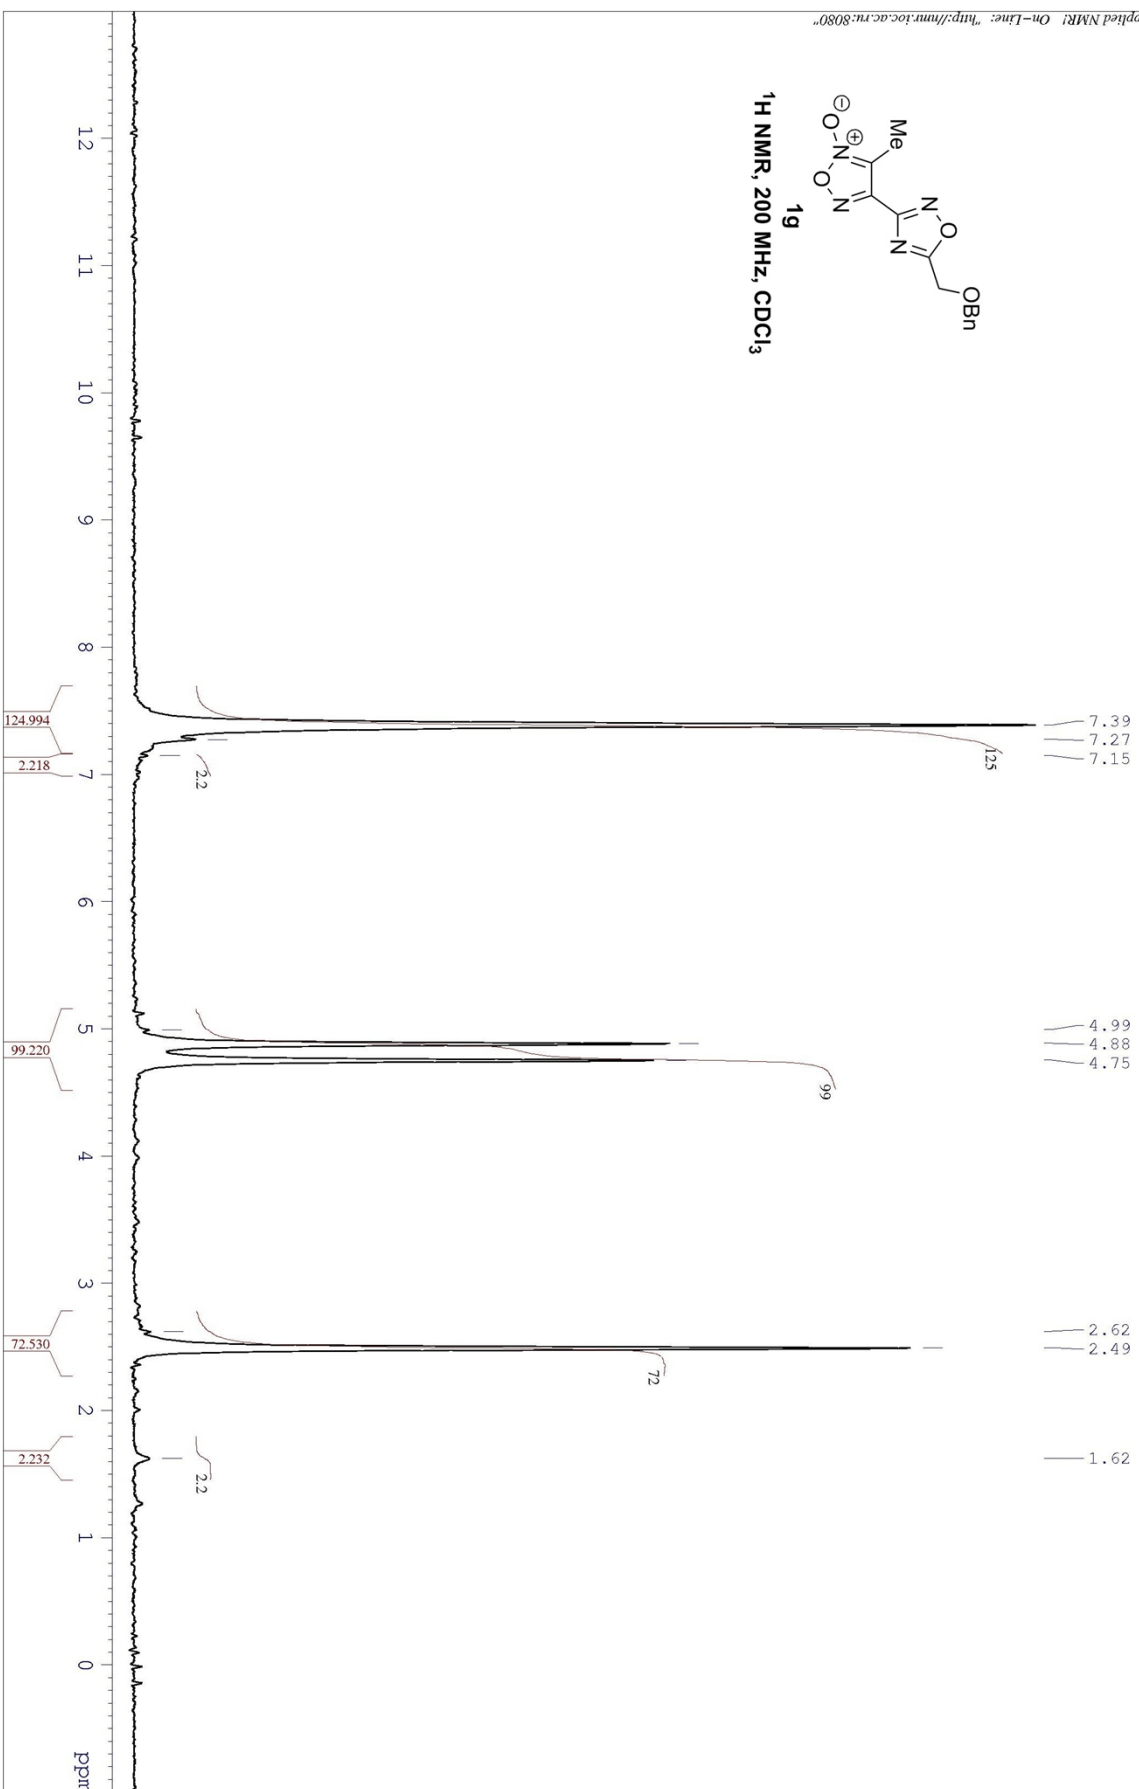



# /USED 736.C13

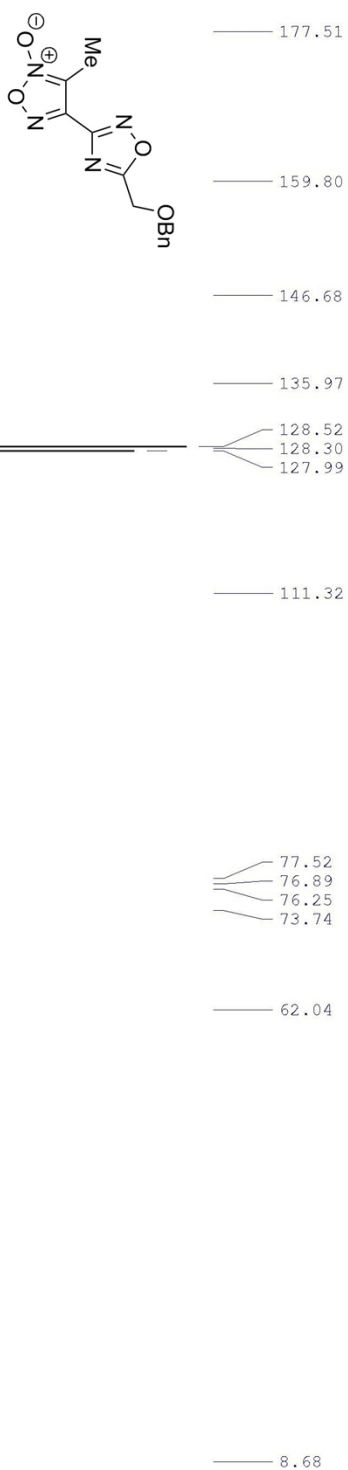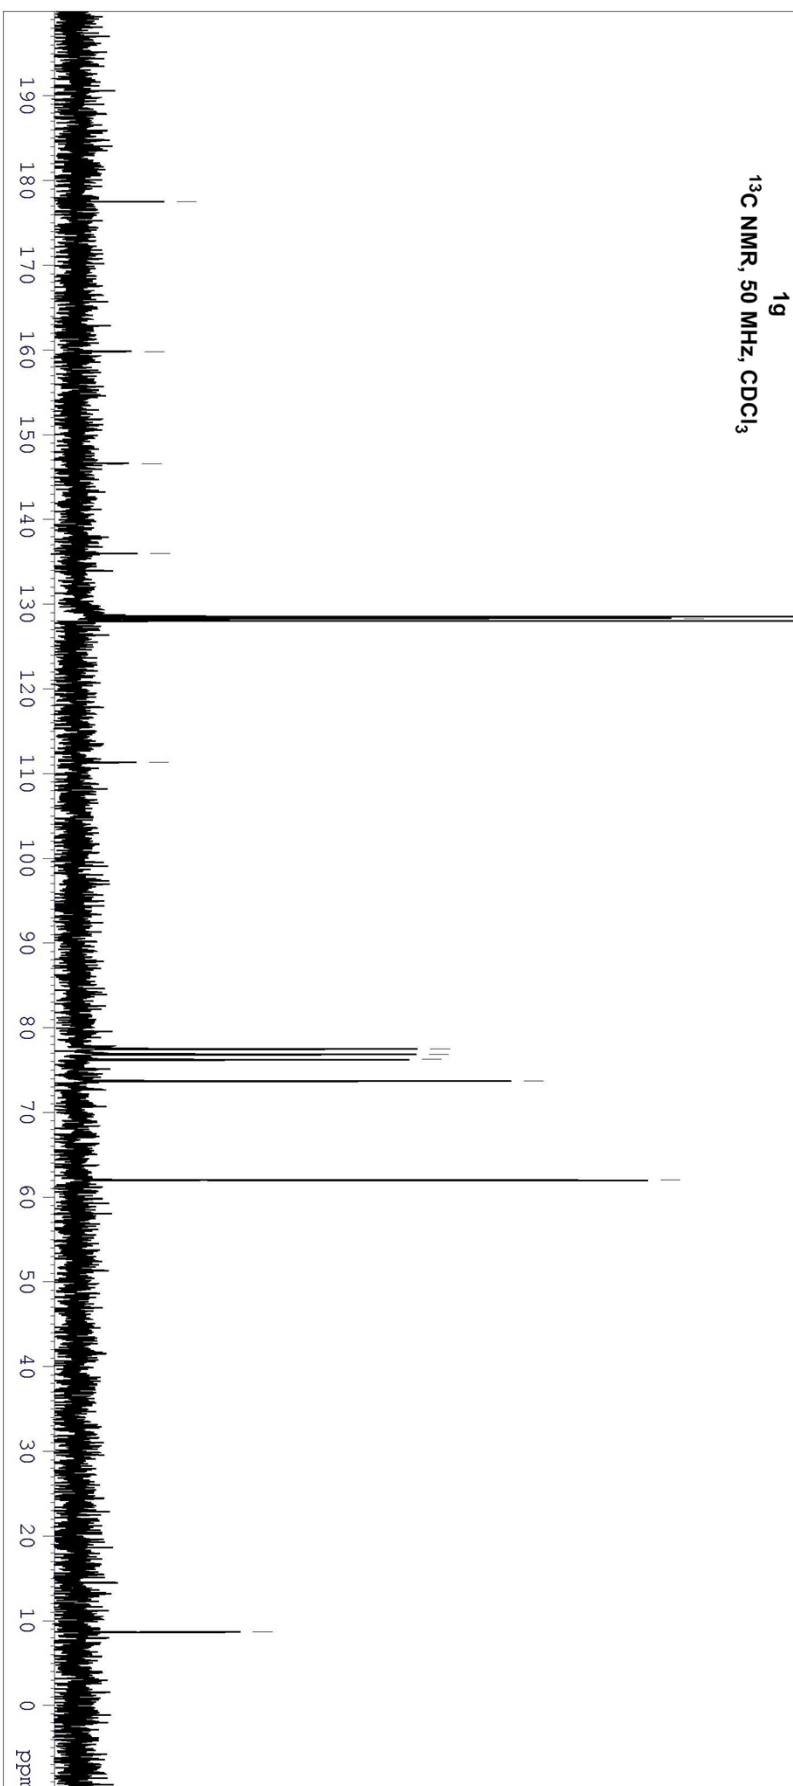

## Display Report

### Analysis Info

Analysis Name D:\Data\Kolotyrkina\2014\Fershtat\1210004.d  
Method tune\_low.m  
Sample Name /USED 736  
Comment C13H12N4O4 mw 288 calibrant added

Acquisition Date 10.12.2014 15:03:02

Operator BDAL@DE  
Instrument / Ser# micrOTOF 10248

### Acquisition Parameter

|             |            |                      |          |                  |           |
|-------------|------------|----------------------|----------|------------------|-----------|
| Source Type | ESI        | Ion Polarity         | Positive | Set Nebulizer    | 0.4 Bar   |
| Focus       | Not active |                      |          | Set Dry Heater   | 180 °C    |
| Scan Begin  | 50 m/z     | Set Capillary        | 4500 V   | Set Dry Gas      | 4.0 l/min |
| Scan End    | 3000 m/z   | Set End Plate Offset | -500 V   | Set Divert Valve | Waste     |

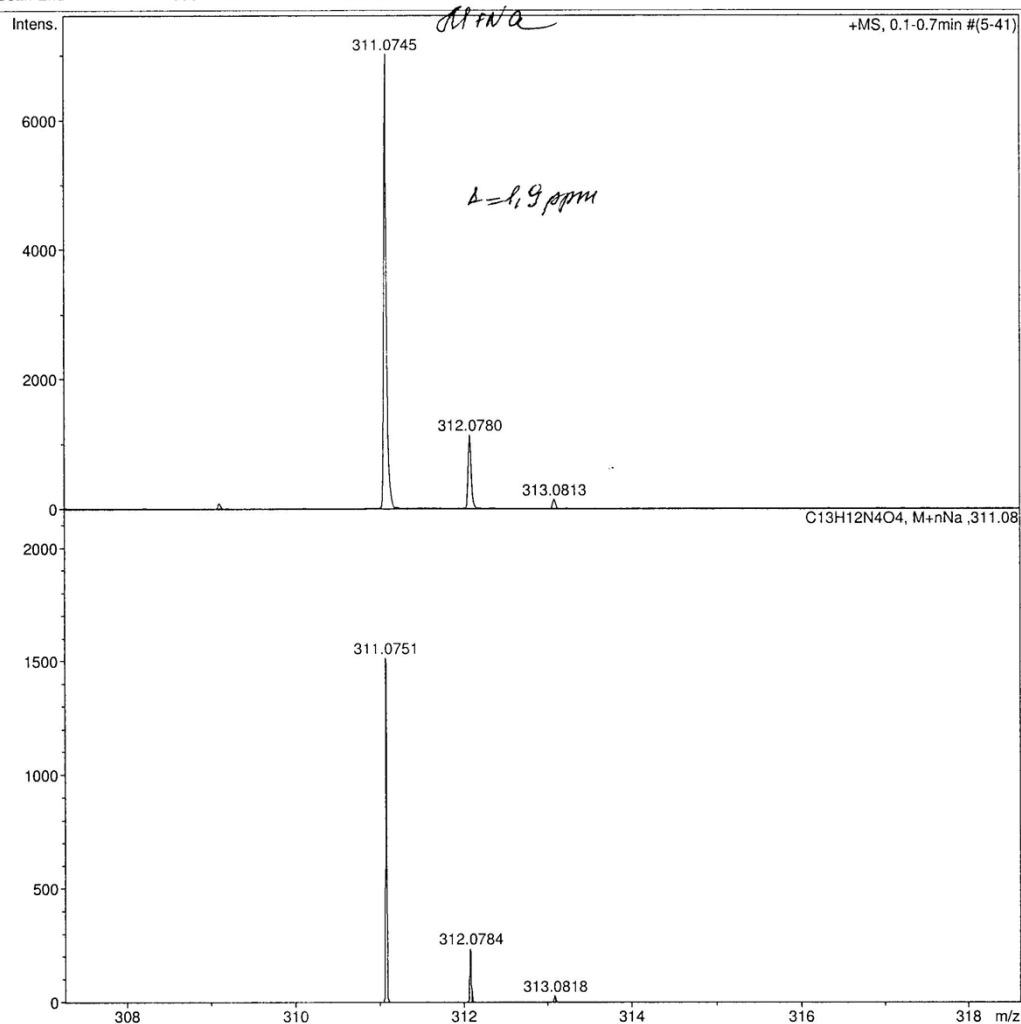

D:\EDL\LEO-747.0

ФЕРИТАТ. LEO-747, прояснения с KBr, 1/200.

10.12.2014

Page 1/1

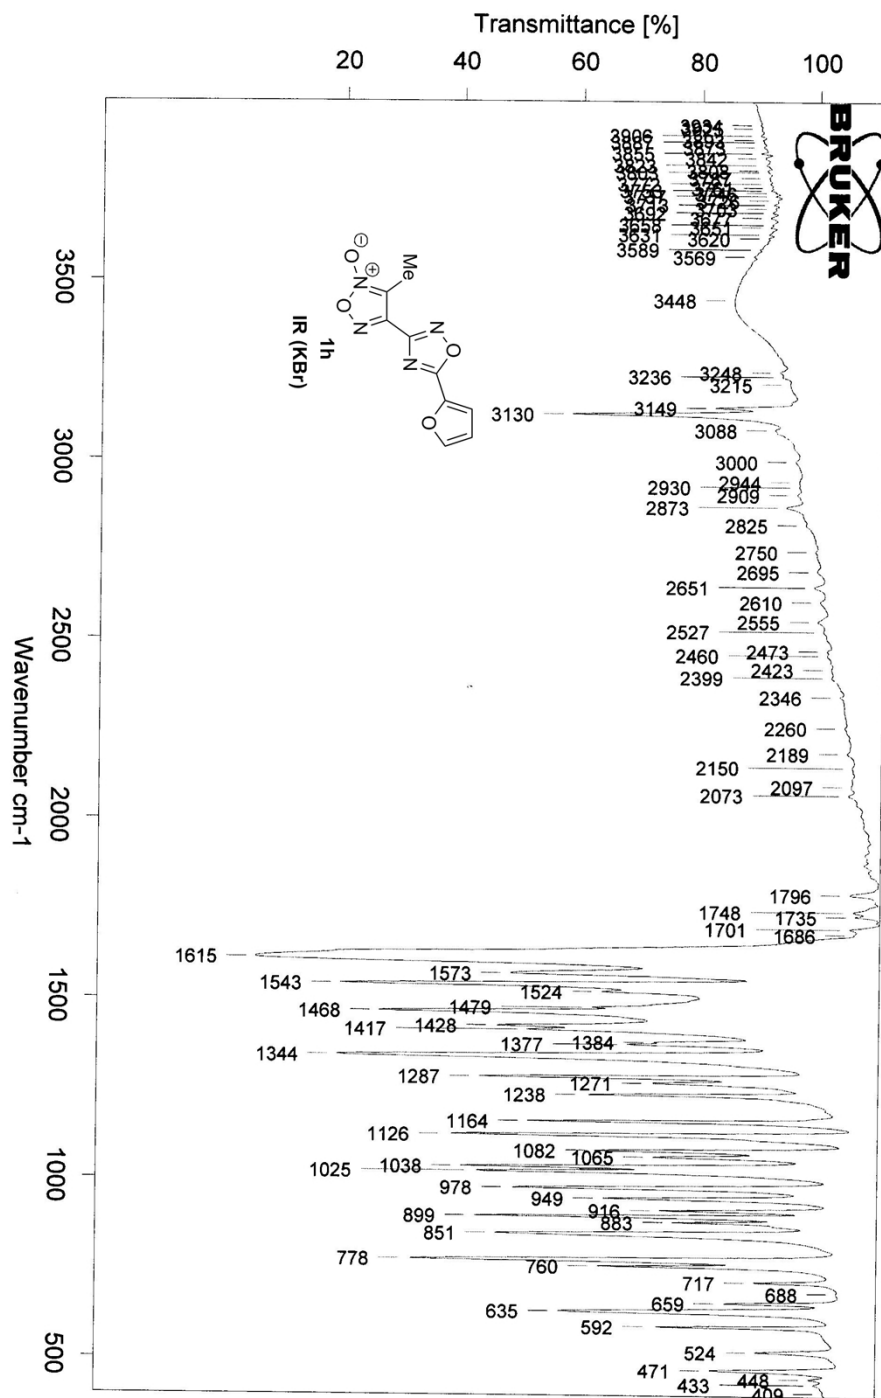

# /USED 747.2

© Zelinsky Institute of Organic Chemistry, Moscow; Bruker AM300 SF=300.13 MHz 1H SI=16K SW=6010 O1=2401 PW=9.0 AQ=1.351 RD=3.00 NS=1 SR=-4.17 TF=300K 9 December 2014 Opr: Struchkova M.I.; Solv: DMSO-d6;  
 The Best Applied NMR! On-Line: "http://nmr.ioc.ac.msc:8080"

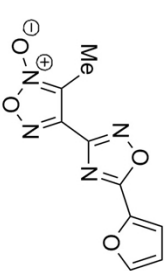

<sup>1</sup>H NMR, 300 MHz, DMSO-d<sub>6</sub>

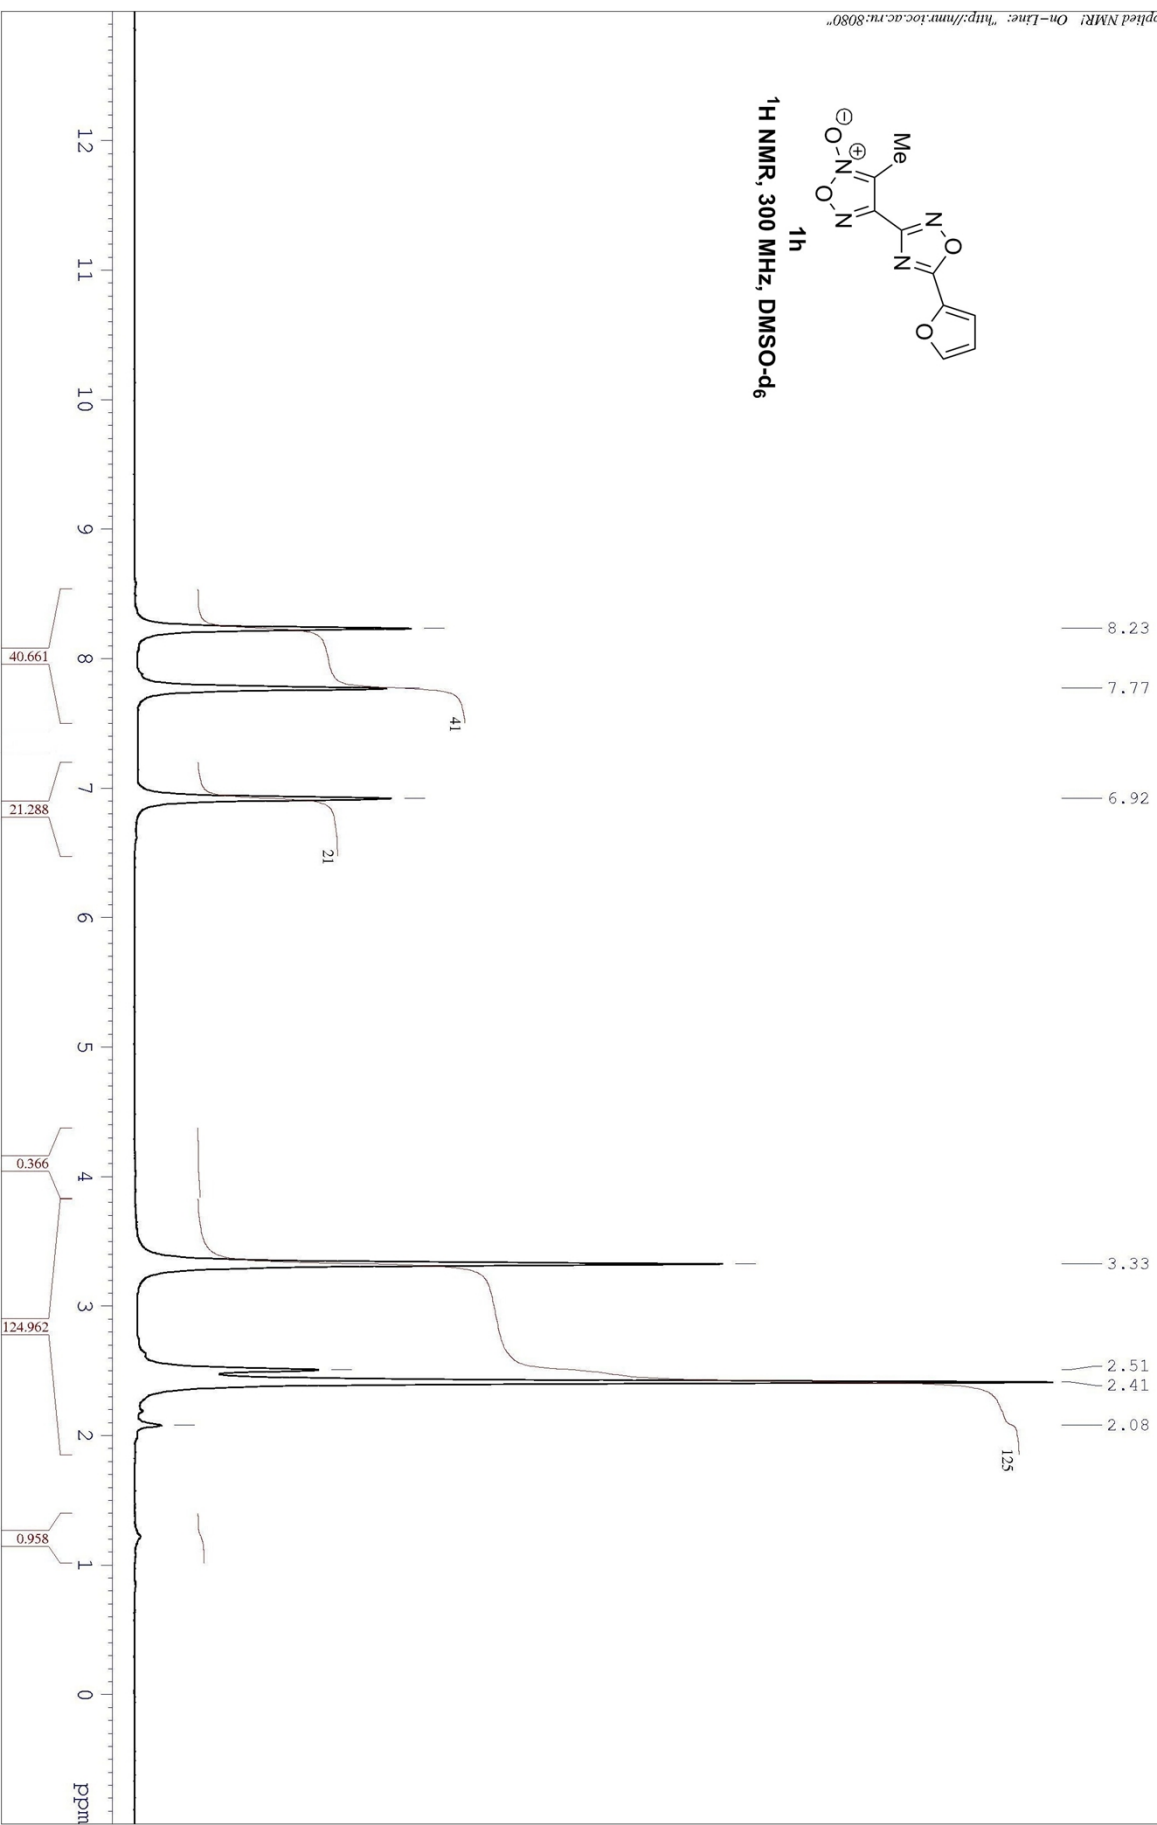

/USED 747.2C13

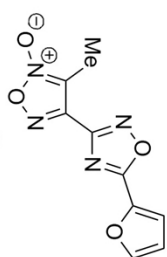

<sup>13</sup>C NMR, 50 MHz, DMSO-d<sub>6</sub>

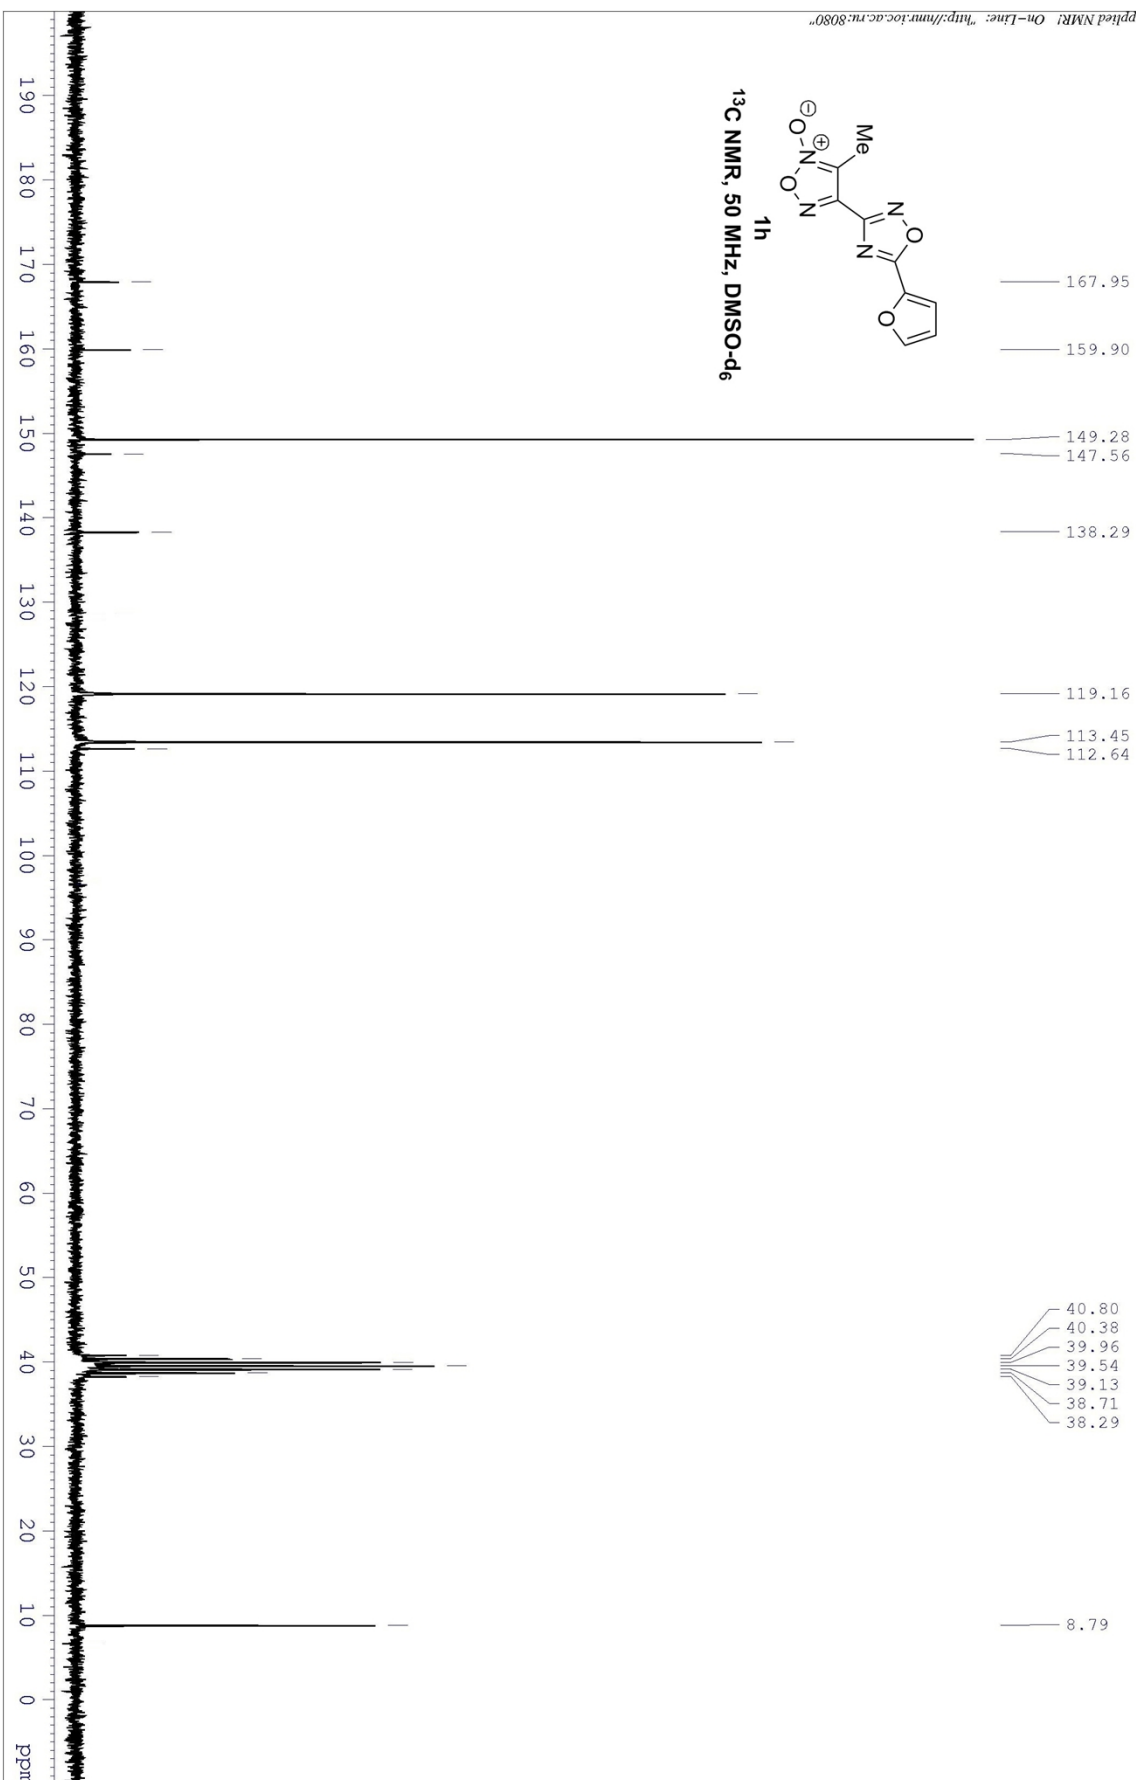

D:\EDL\756.0 ФЕРУЛАТ. 756 , препарат с KBr, 1/200.

24.02.2015

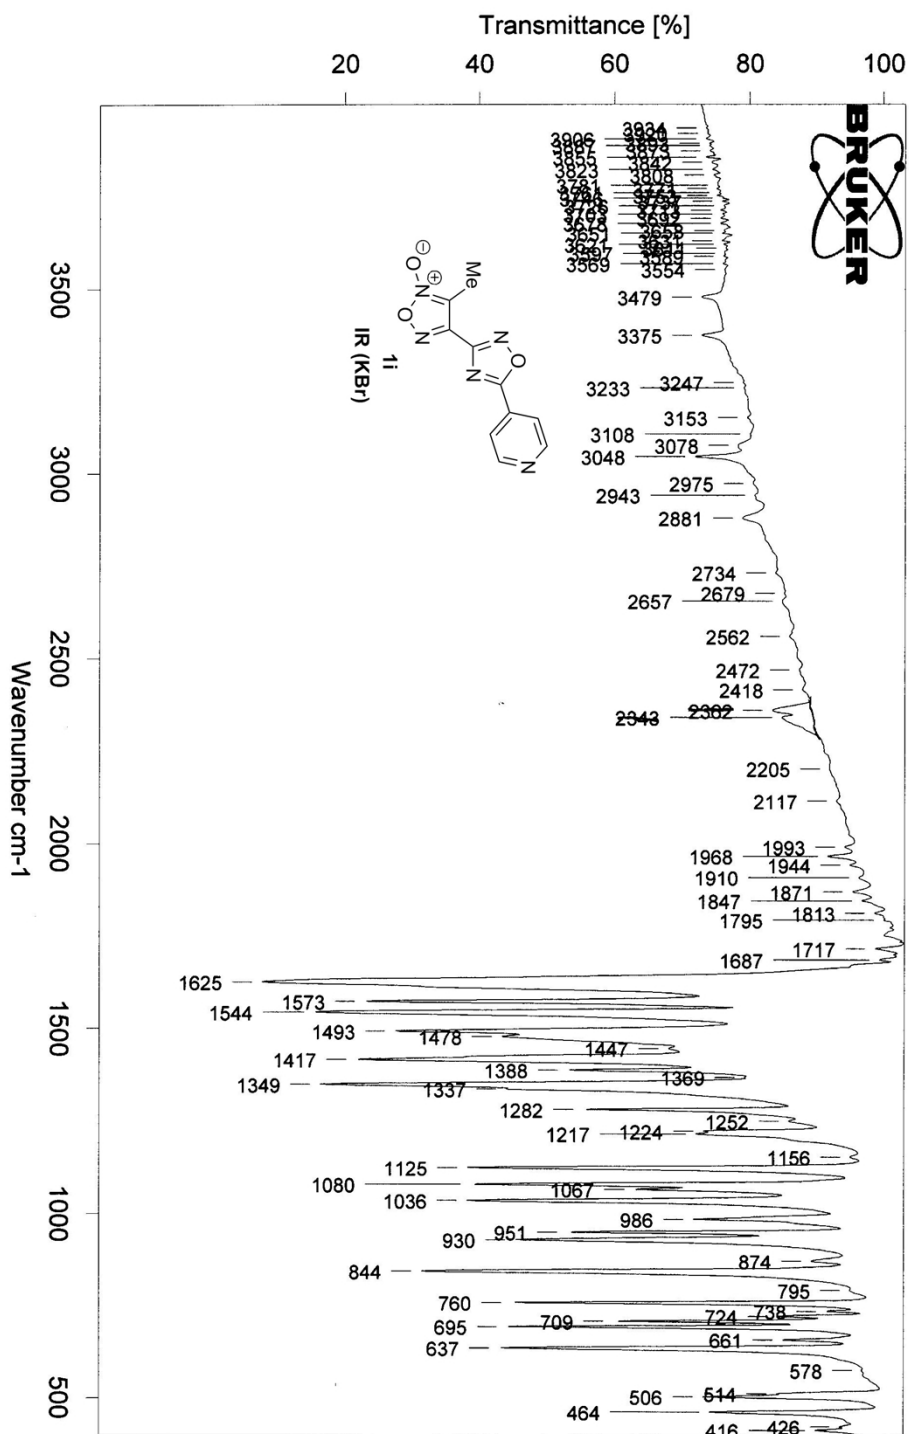

/USED 756

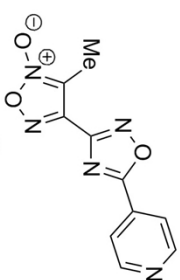

<sup>1</sup>H NMR, 200 MHz, DMSO-d<sub>6</sub>

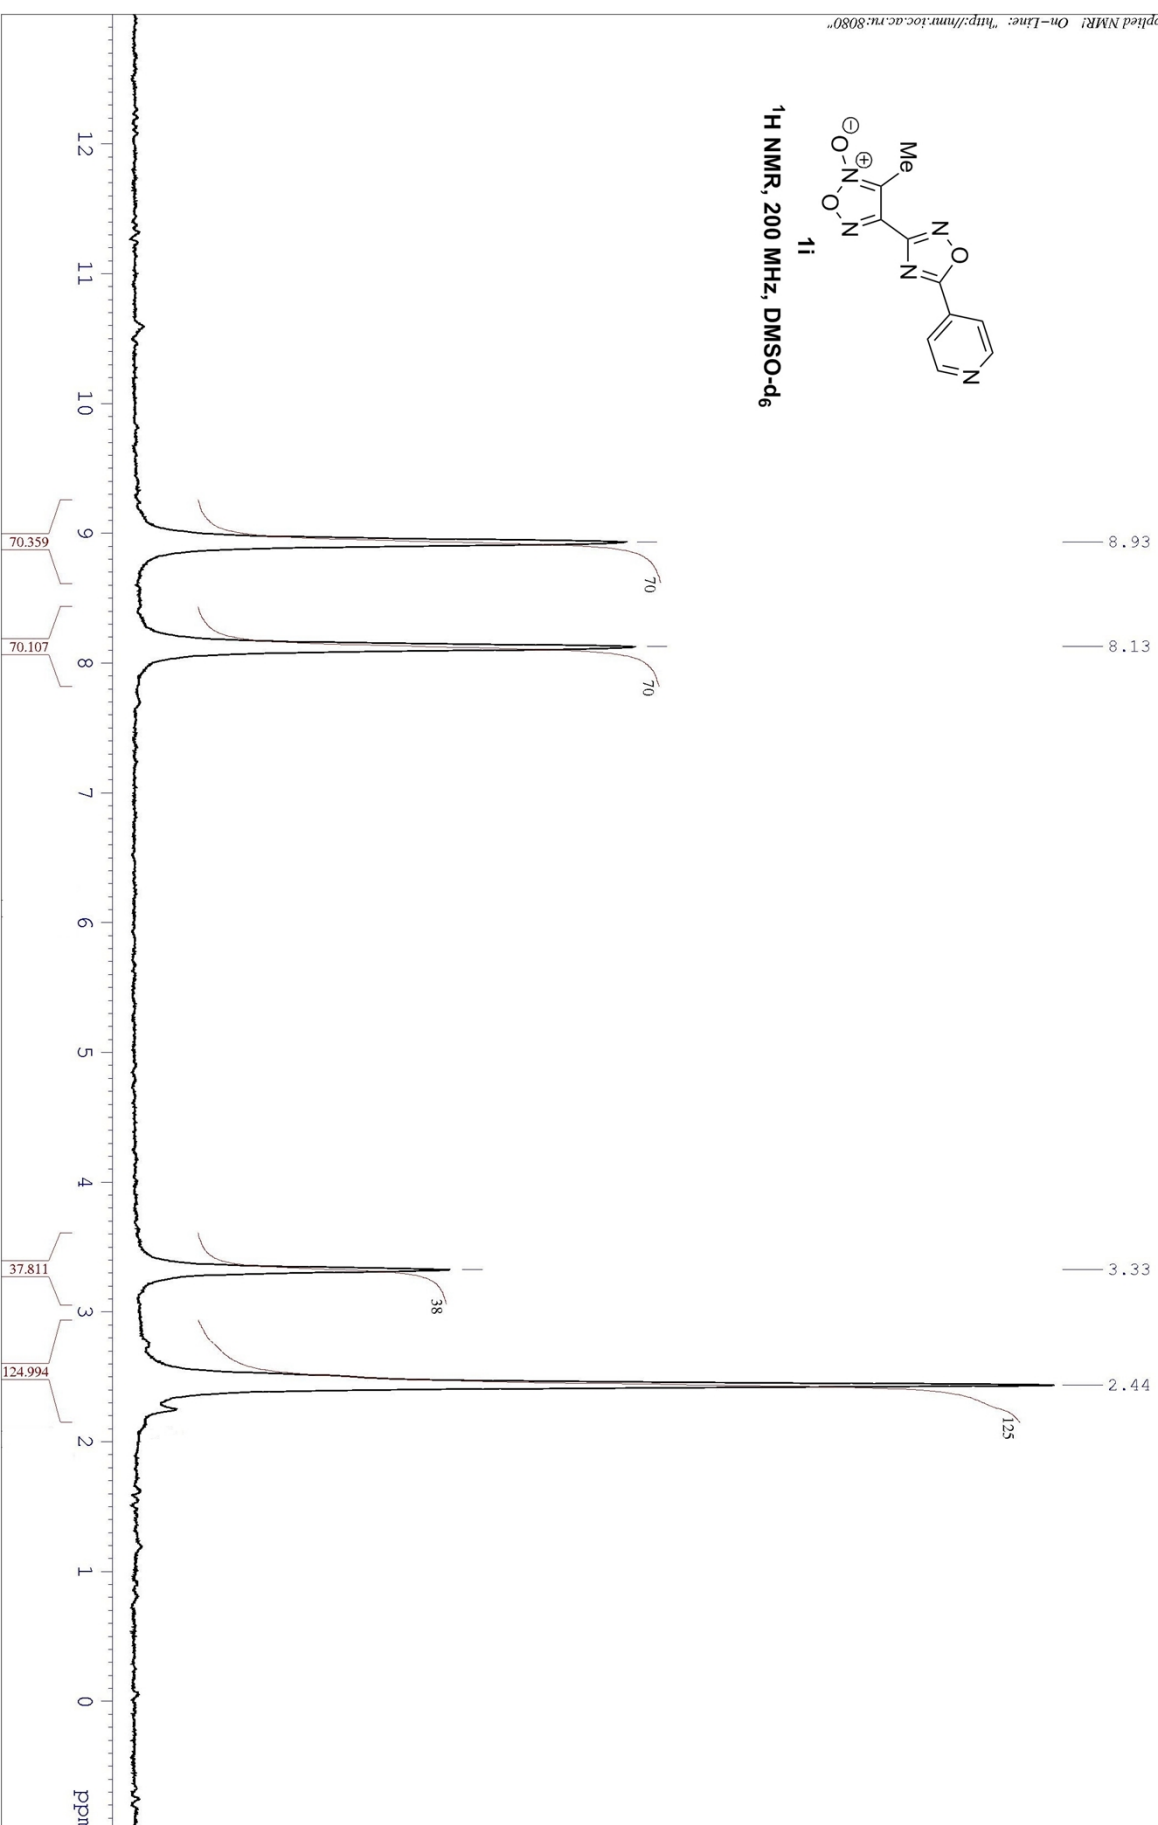

# /USED 756.C13

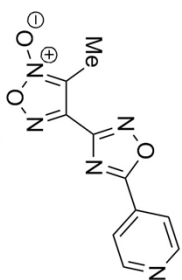

<sup>13</sup>C NMR, 50 MHz, DMSO-d<sub>6</sub>

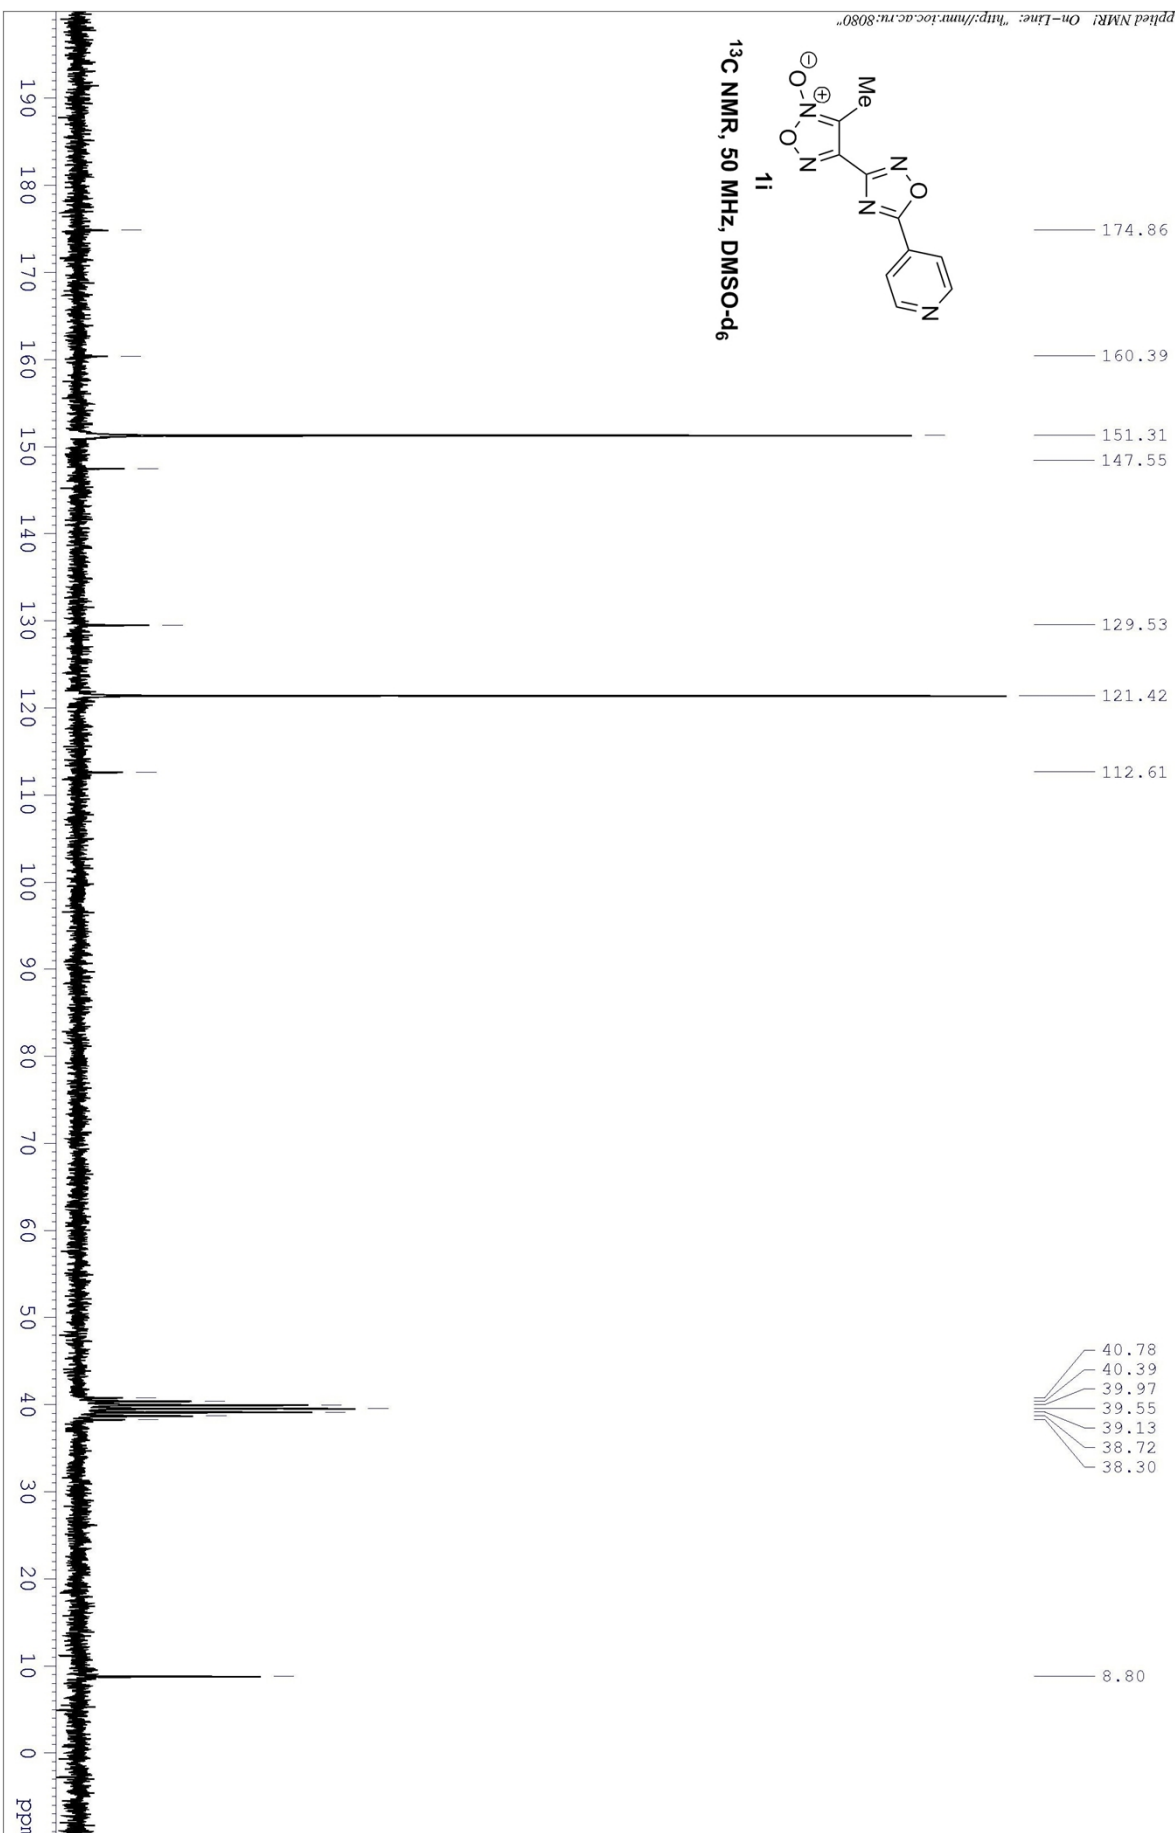



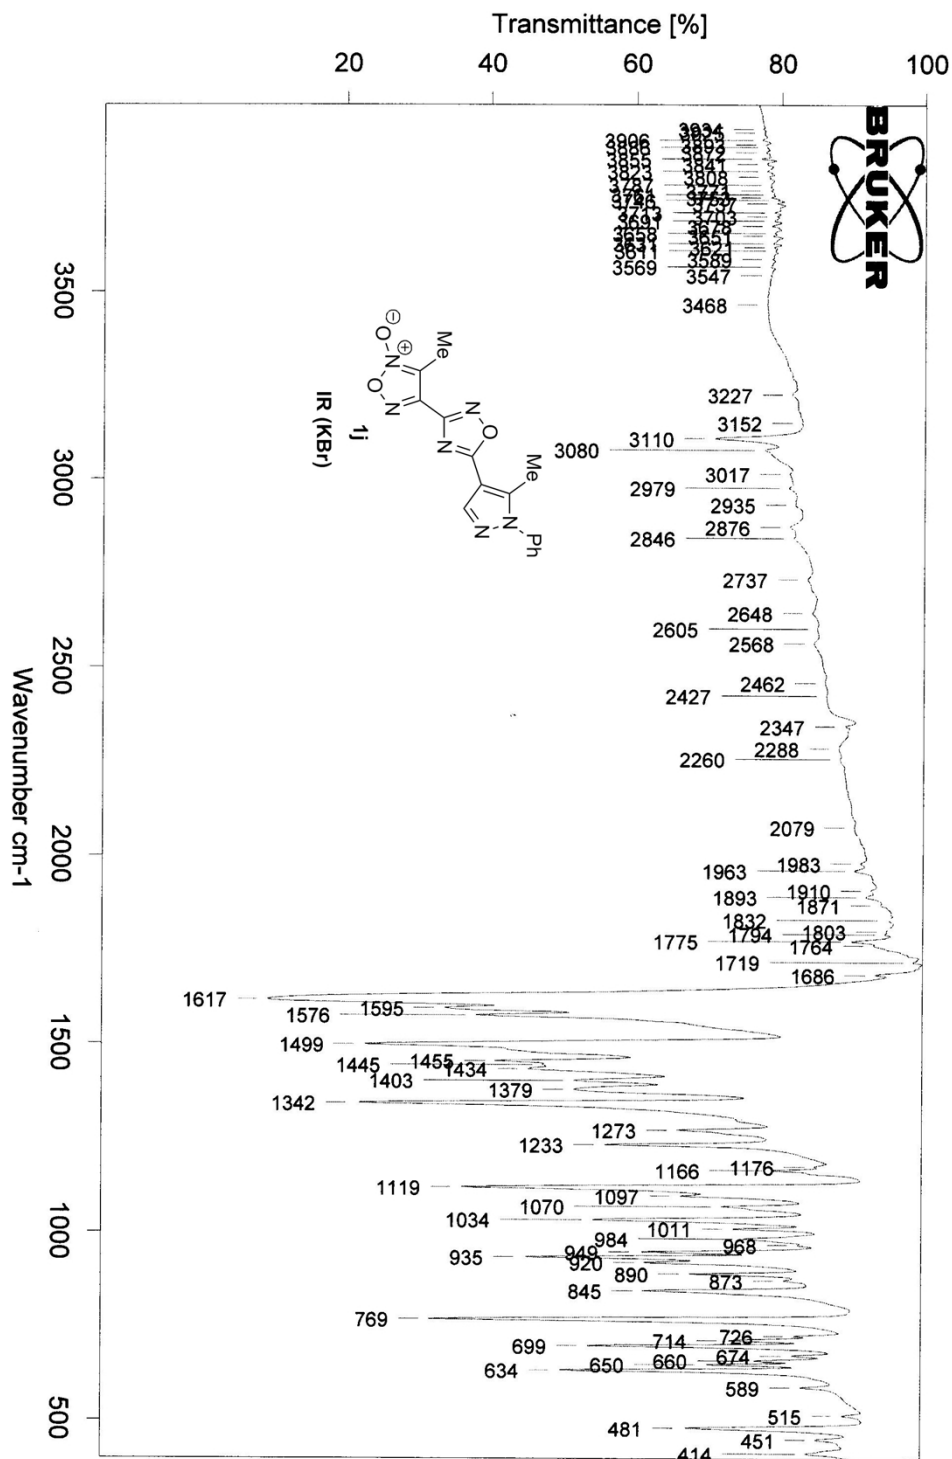

/USED 785

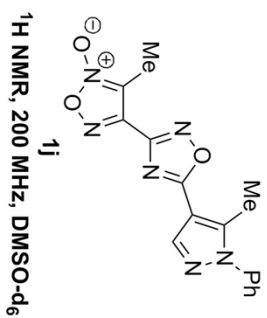

<sup>1</sup>H NMR, 200 MHz, DMSO-d<sub>6</sub>

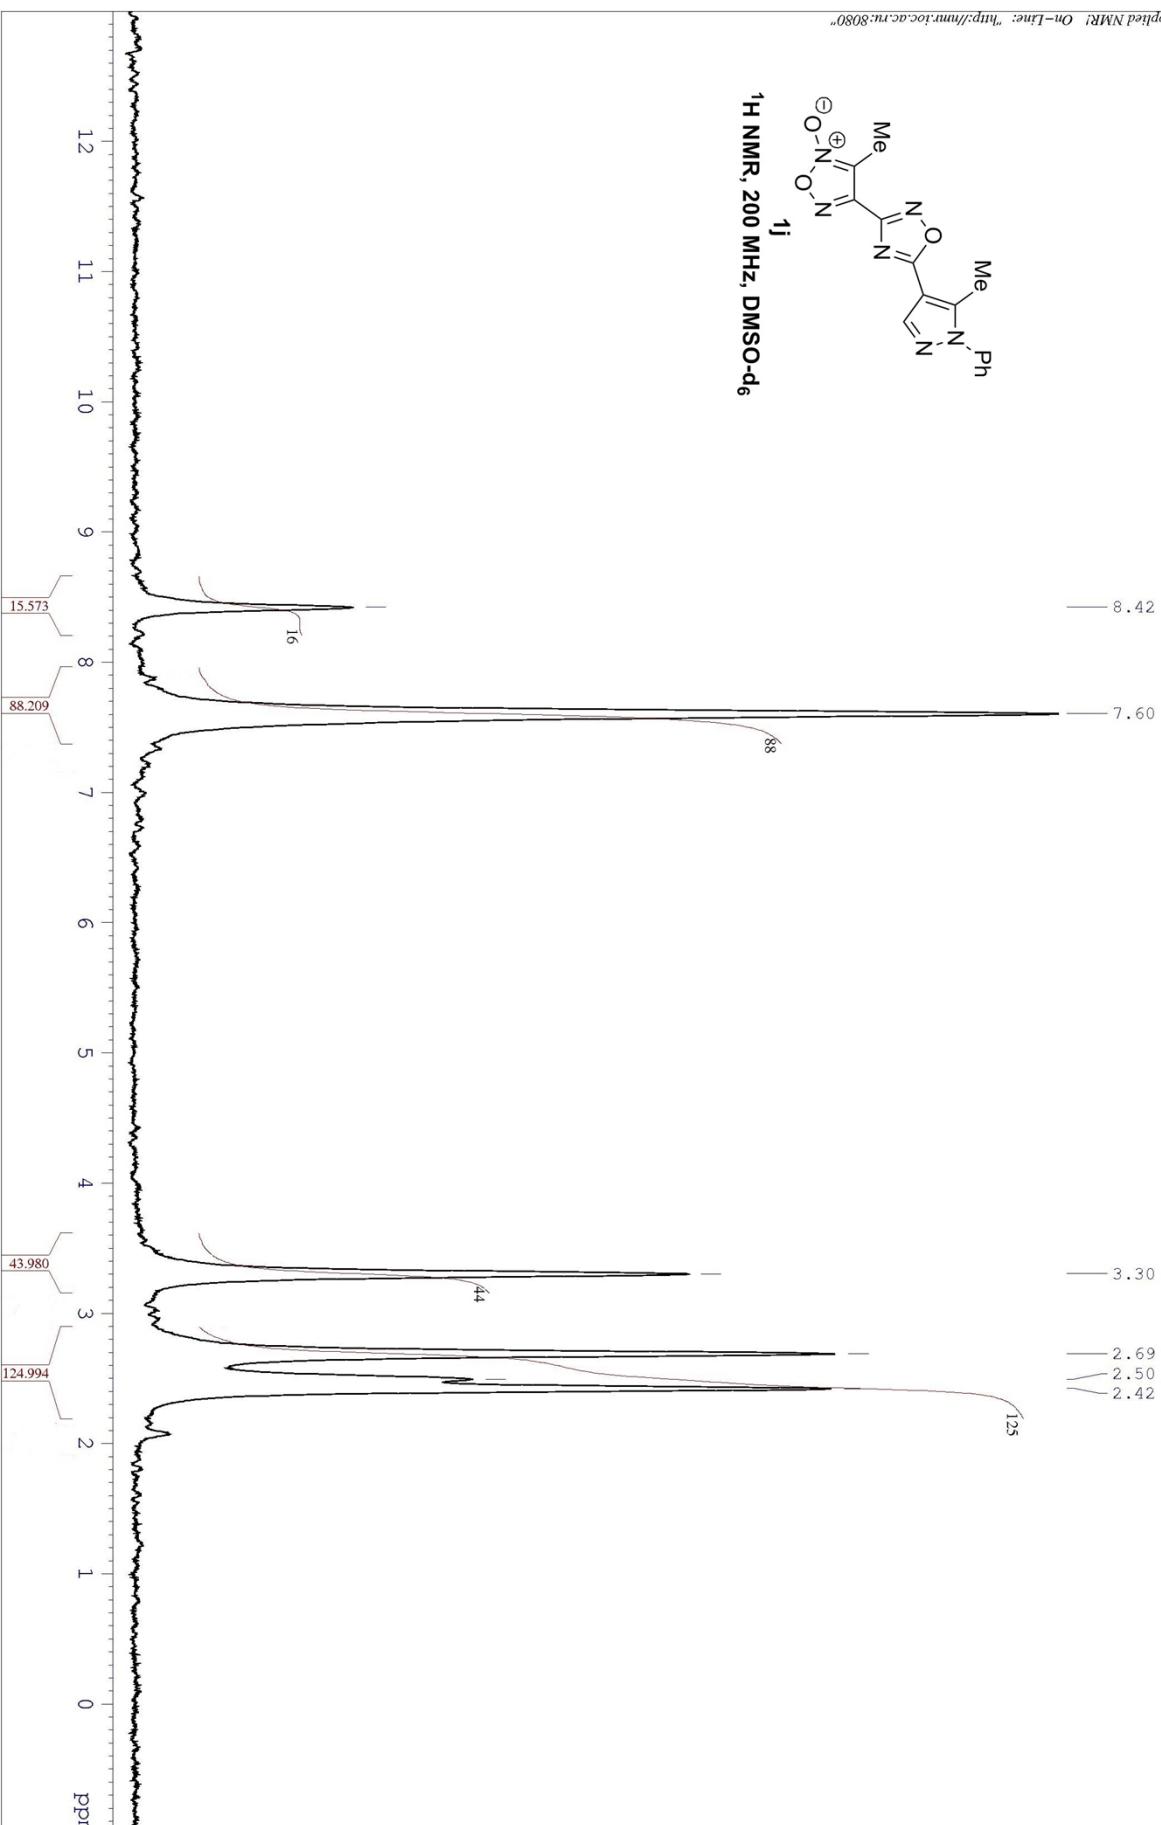

# /USED 785

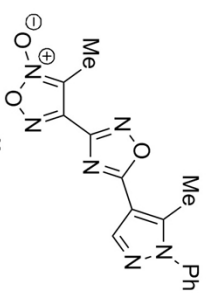

<sup>13</sup>C NMR, 75.5 MHz, DMSO-d<sub>6</sub>

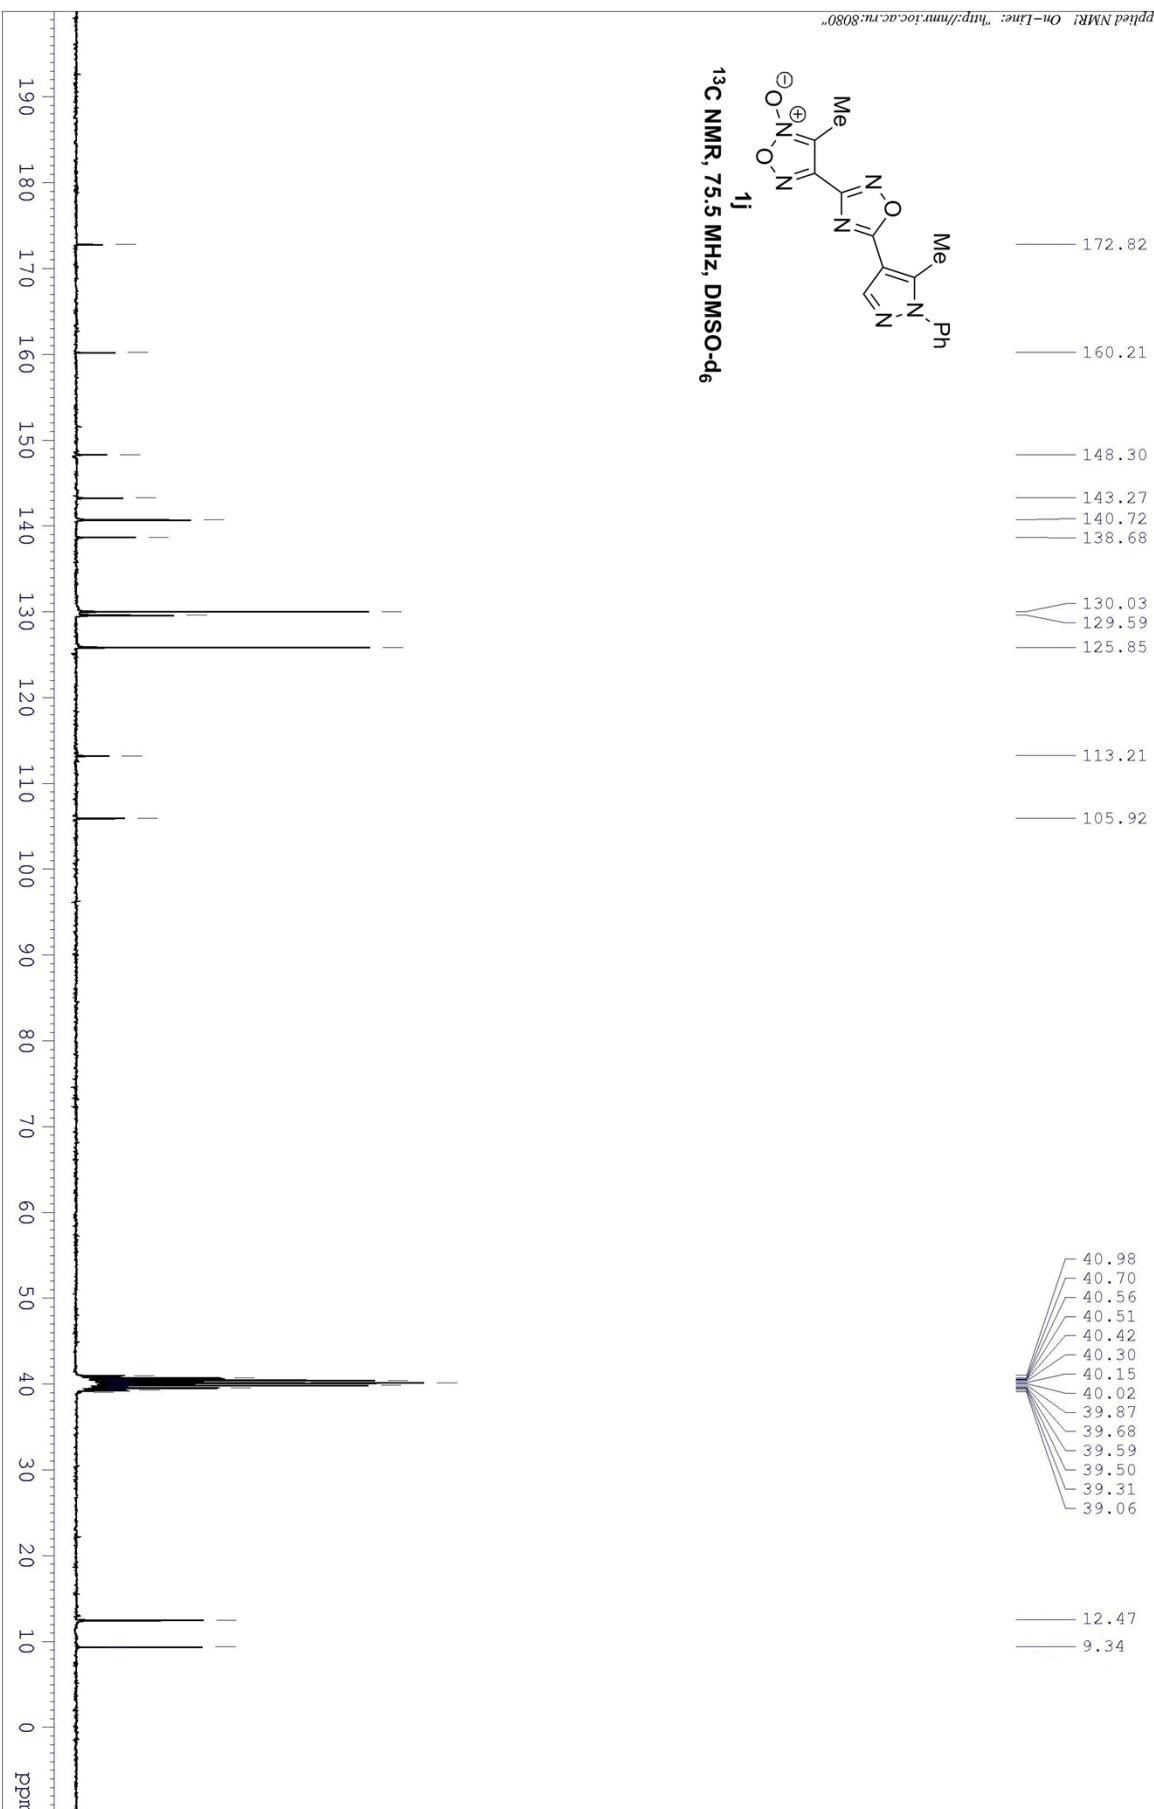

## Display Report

### Analysis Info

Analysis Name D:\Data\Chizhov\Makhova\Fershtat\785\_&clblow.d  
Method tune\_low.m  
Sample Name /USED 785  
Comment CH3CN 100 %, dil. 200, calibrant added

Acquisition Date 02.04.2015 14:57:07

Operator BDAL@DE  
Instrument / Ser# micrOTOF 10248

### Acquisition Parameter

|             |            |                      |          |                  |           |
|-------------|------------|----------------------|----------|------------------|-----------|
| Source Type | ESI        | Ion Polarity         | Positive | Set Nebulizer    | 0.4 Bar   |
| Focus       | Not active |                      |          | Set Dry Heater   | 180 °C    |
| Scan Begin  | 50 m/z     | Set Capillary        | 4500 V   | Set Dry Gas      | 4.0 l/min |
| Scan End    | 3000 m/z   | Set End Plate Offset | -500 V   | Set Divert Valve | Waste     |

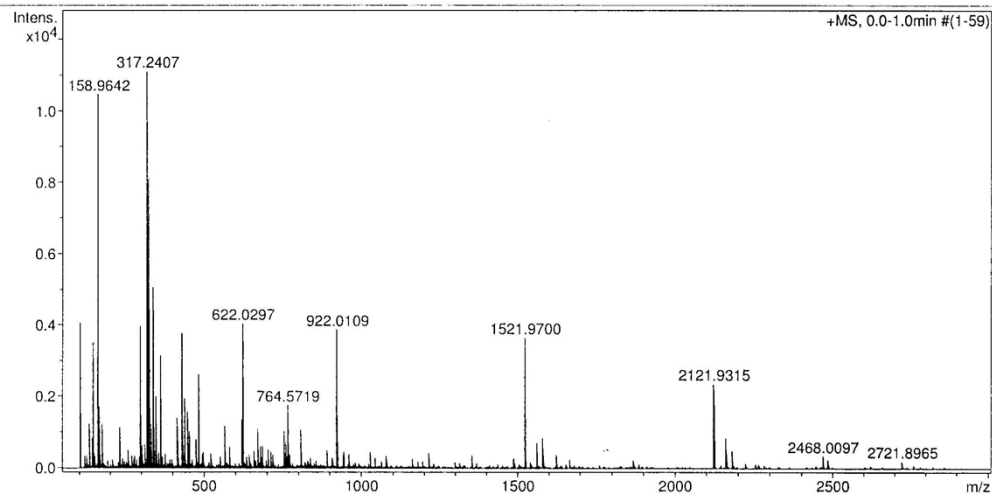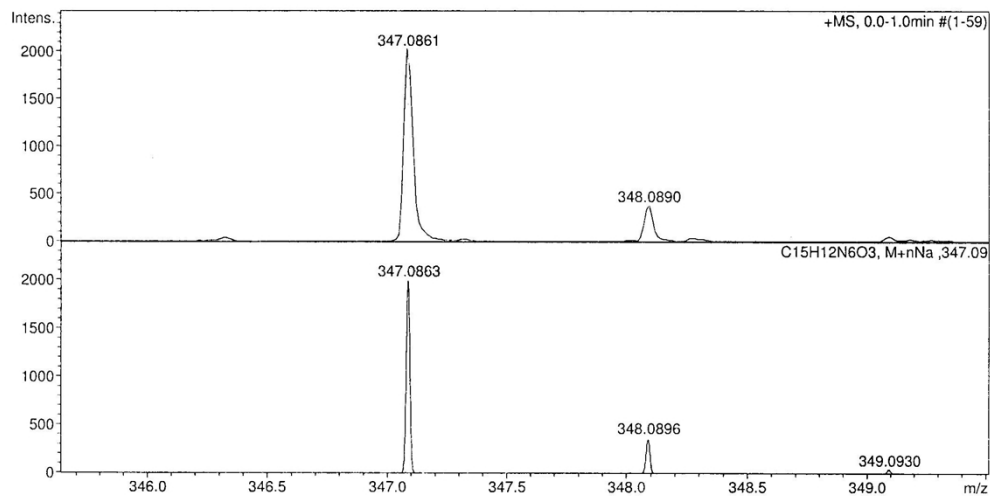

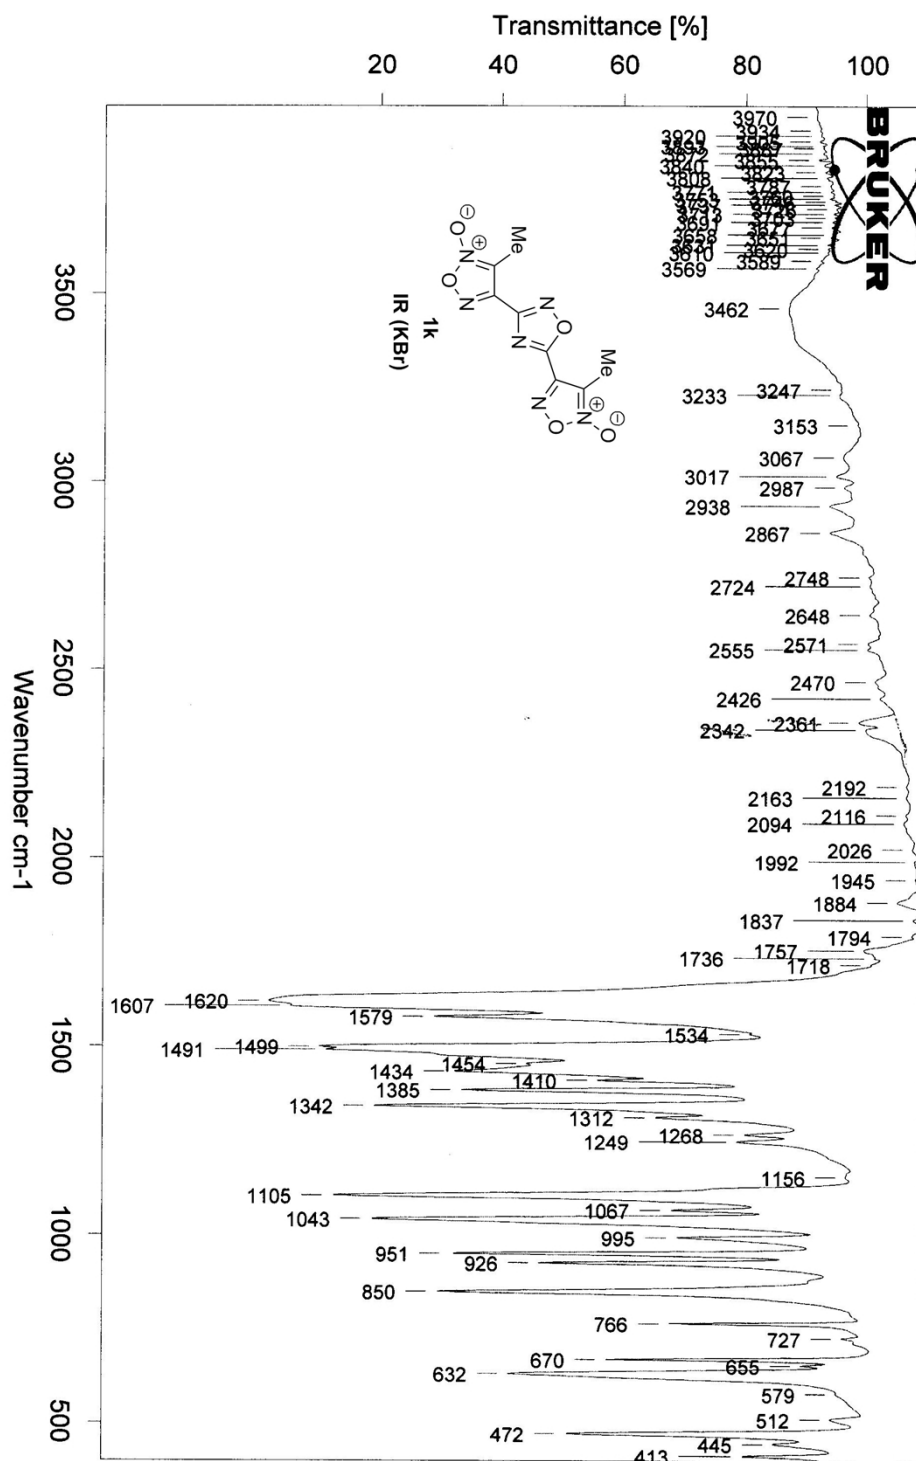

/USED 777

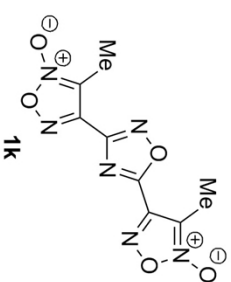

<sup>1</sup>H NMR, 300 MHz, DMSO-d<sub>6</sub>

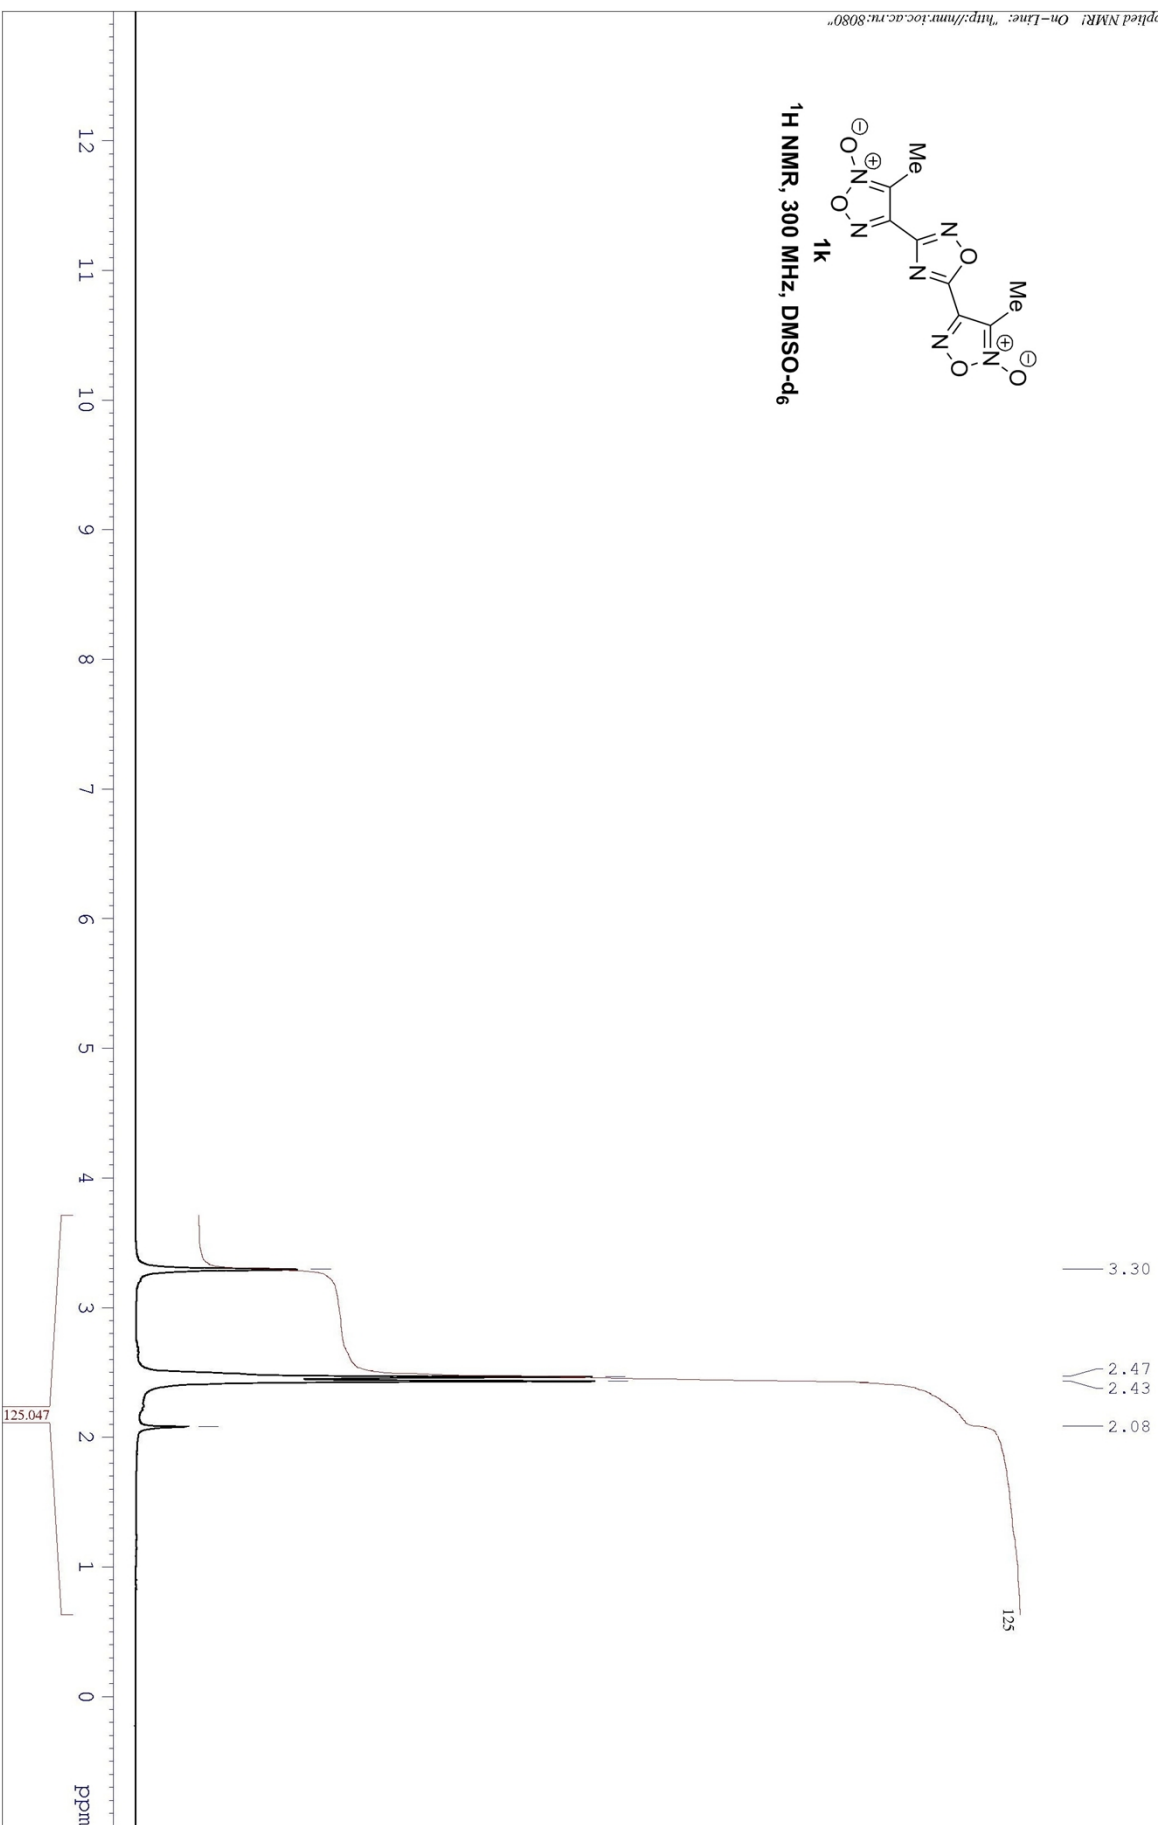

# /USED 777.C13

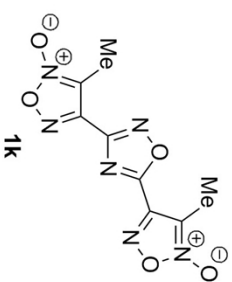

<sup>13</sup>C NMR, 50 MHz, DMSO-d<sub>6</sub>

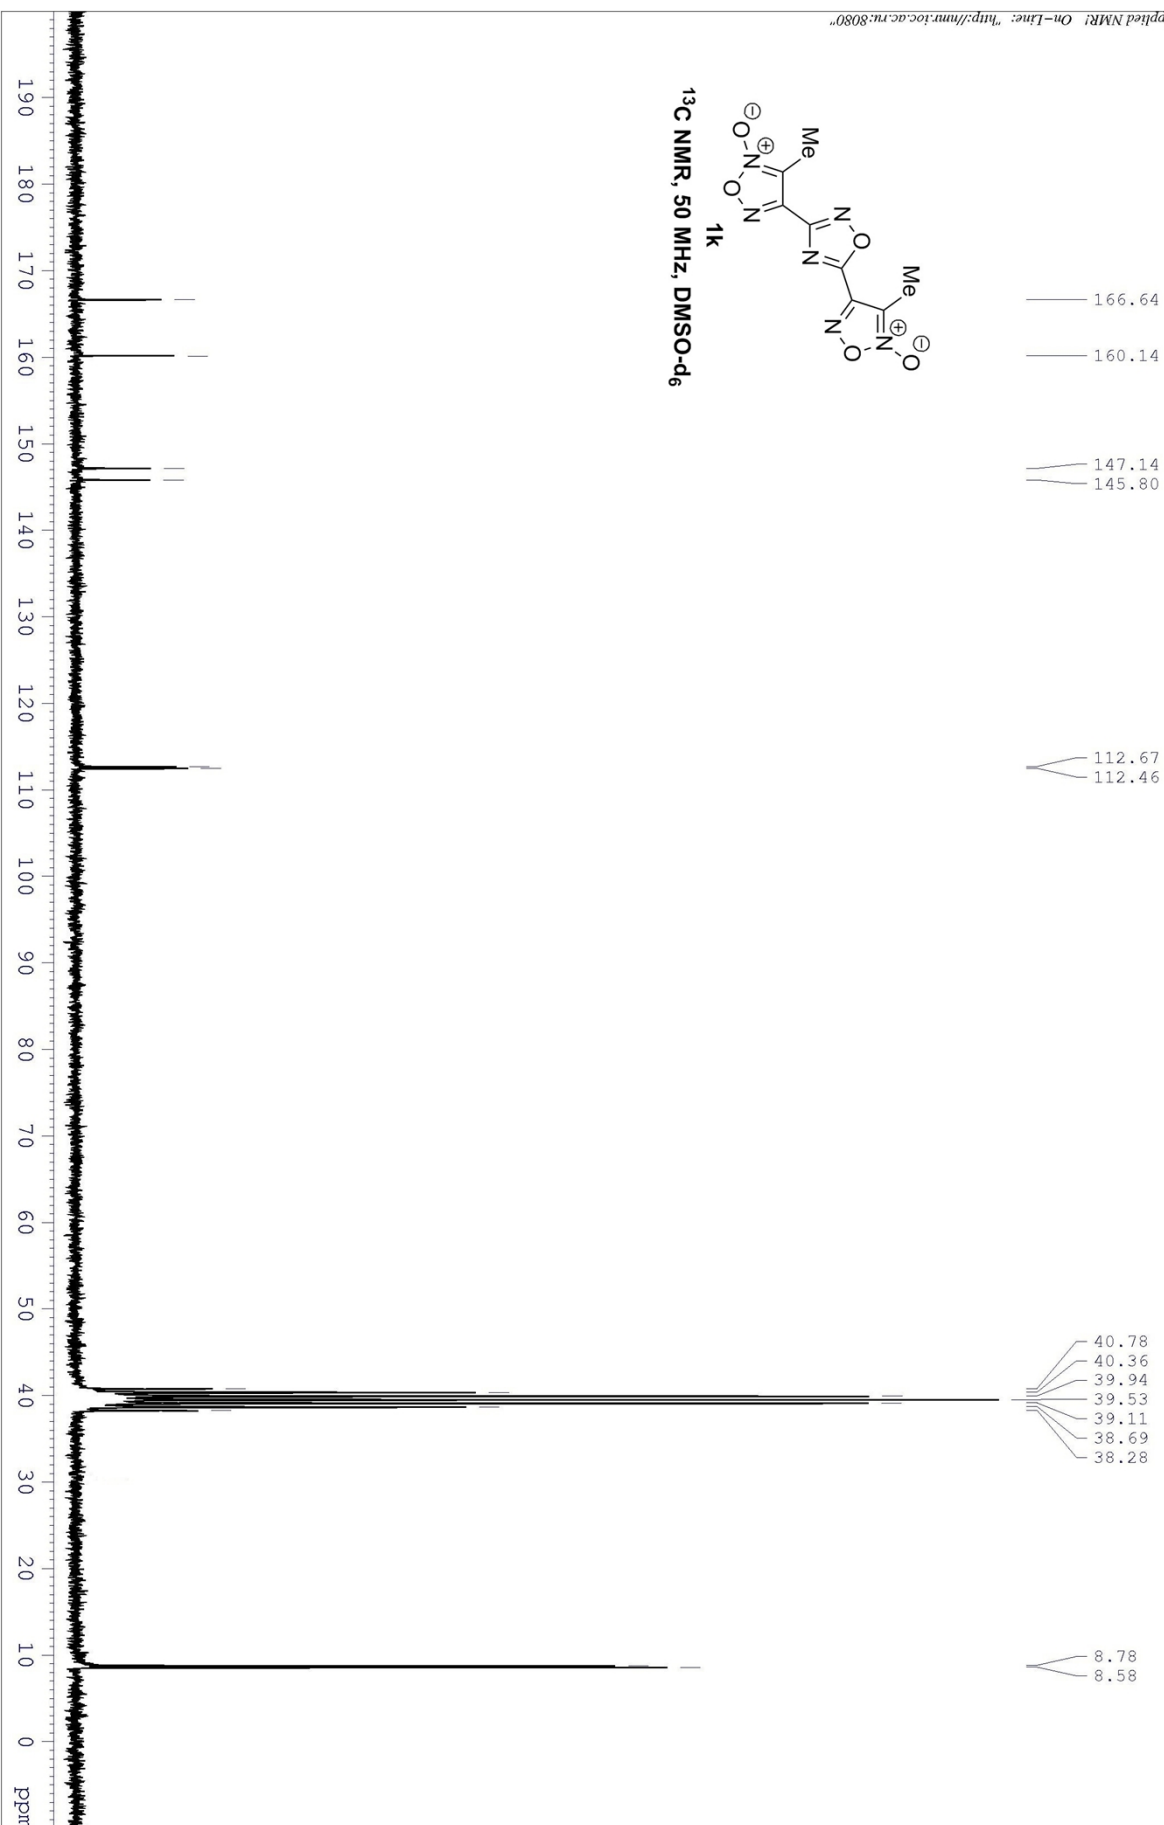

# USED 777

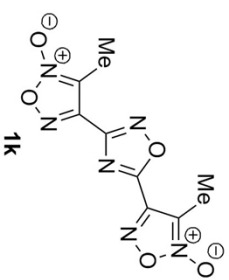

$^{13}\text{C}$  NMR, 75.5 MHz, DMSO- $d_6$

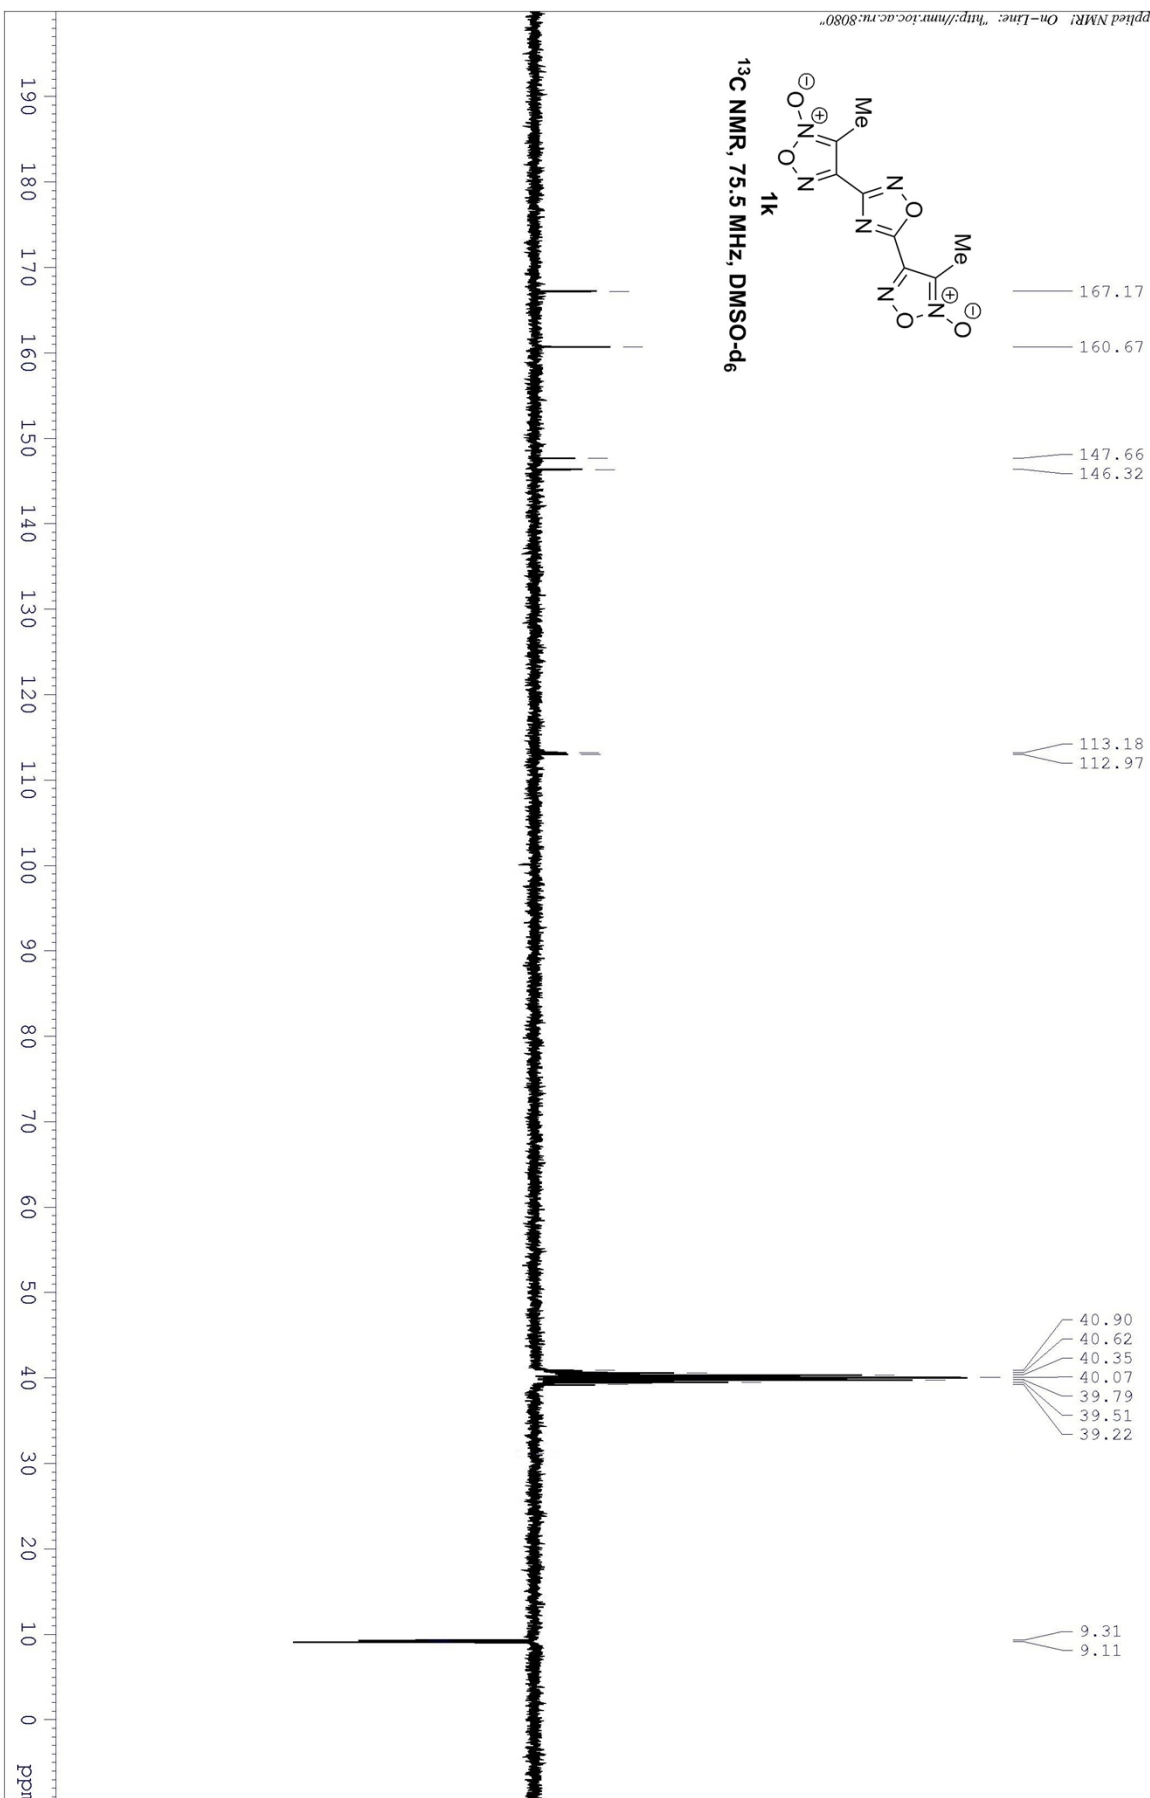



## Display Report

### Analysis Info

Analysis Name D:\Data\Chizhov\Makhova\Fershtat\777\_low.d  
Method tune\_low.m  
Sample Name /USED 777  
Comment CH3CN 100 %, dil. 20, no calibrant added

Acquisition Date 27.02.2015 12:54:06

Operator BDAL@DE  
Instrument / Ser# micrOTOF 10248

### Acquisition Parameter

|             |            |                      |          |                  |           |
|-------------|------------|----------------------|----------|------------------|-----------|
| Source Type | ESI        | Ion Polarity         | Positive | Set Nebulizer    | 0.4 Bar   |
| Focus       | Not active |                      |          | Set Dry Heater   | 180 °C    |
| Scan Begin  | 50 m/z     | Set Capillary        | 4500 V   | Set Dry Gas      | 4.0 l/min |
| Scan End    | 3000 m/z   | Set End Plate Offset | -500 V   | Set Divert Valve | Waste     |

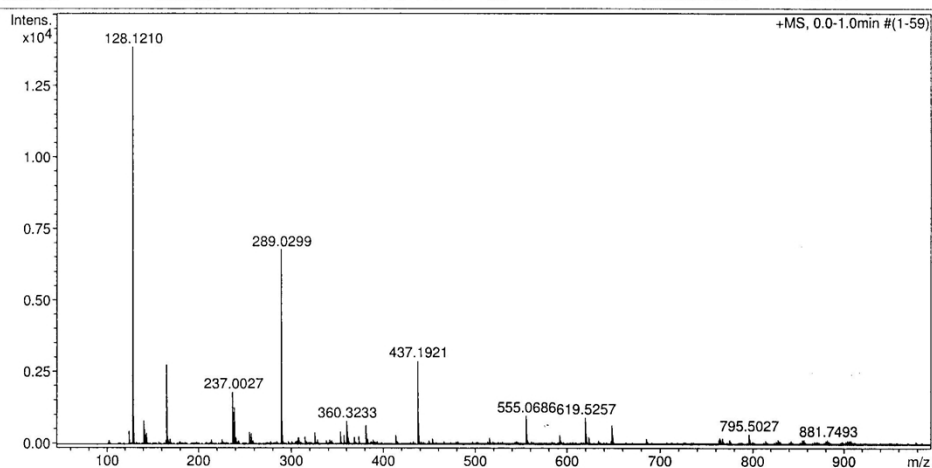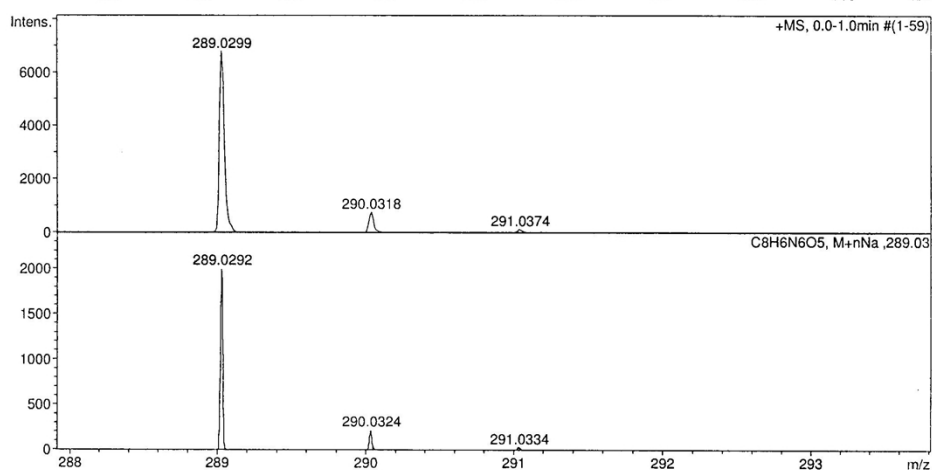

D:\EDL\LEO-752.0

ФЕРУЛАТ, LEO-752, препарат с KBr 1/200.

17.02.2015

Page 1/1

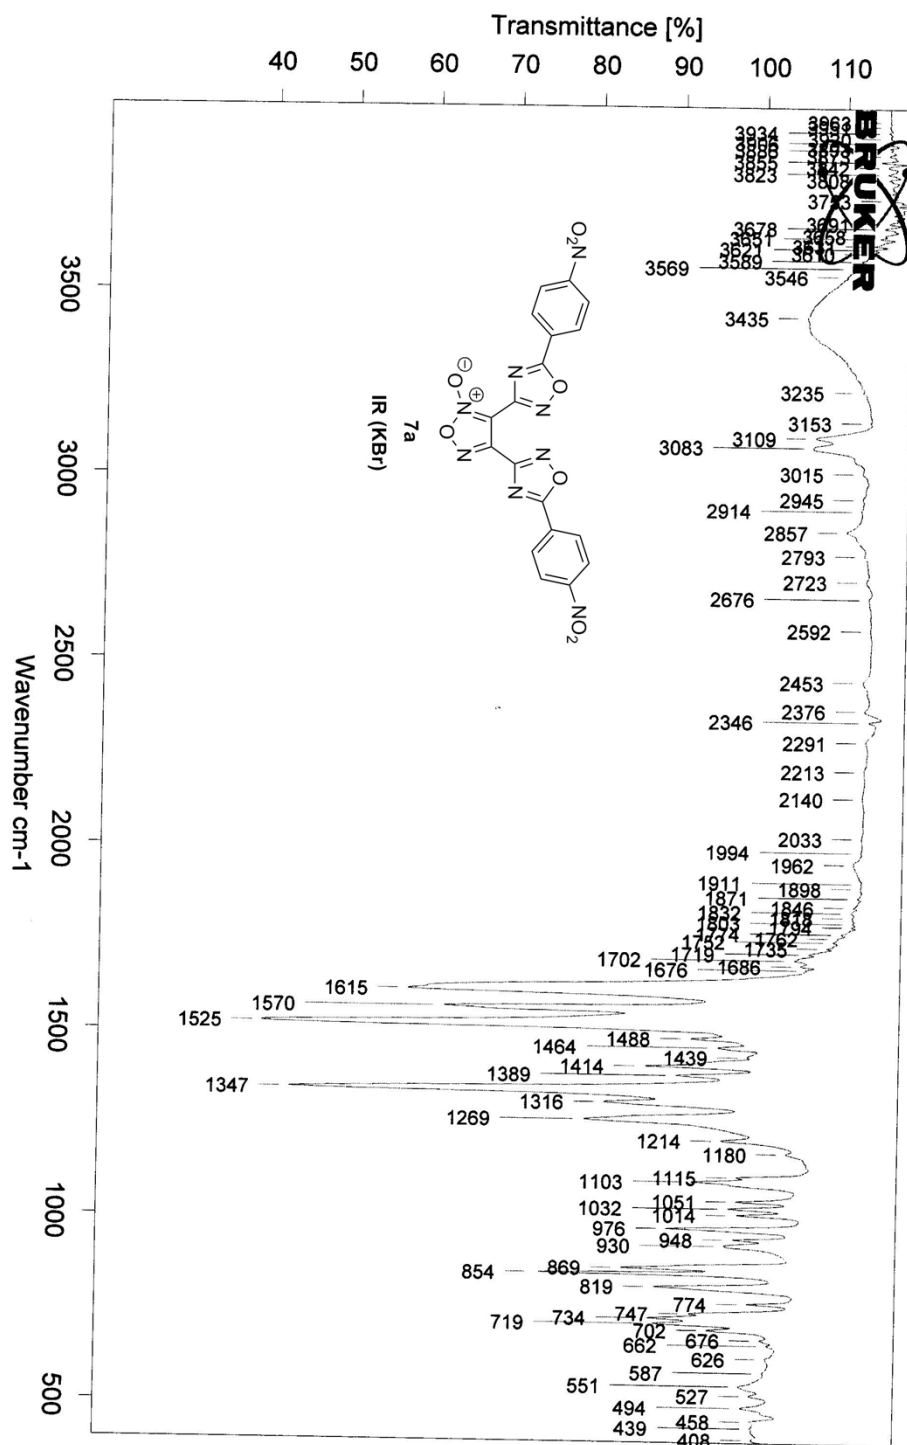

/USED 695

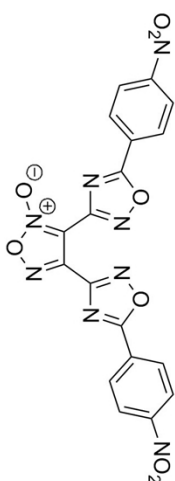

7a

<sup>1</sup>H NMR, 200 MHz, DMSO-d<sub>6</sub>

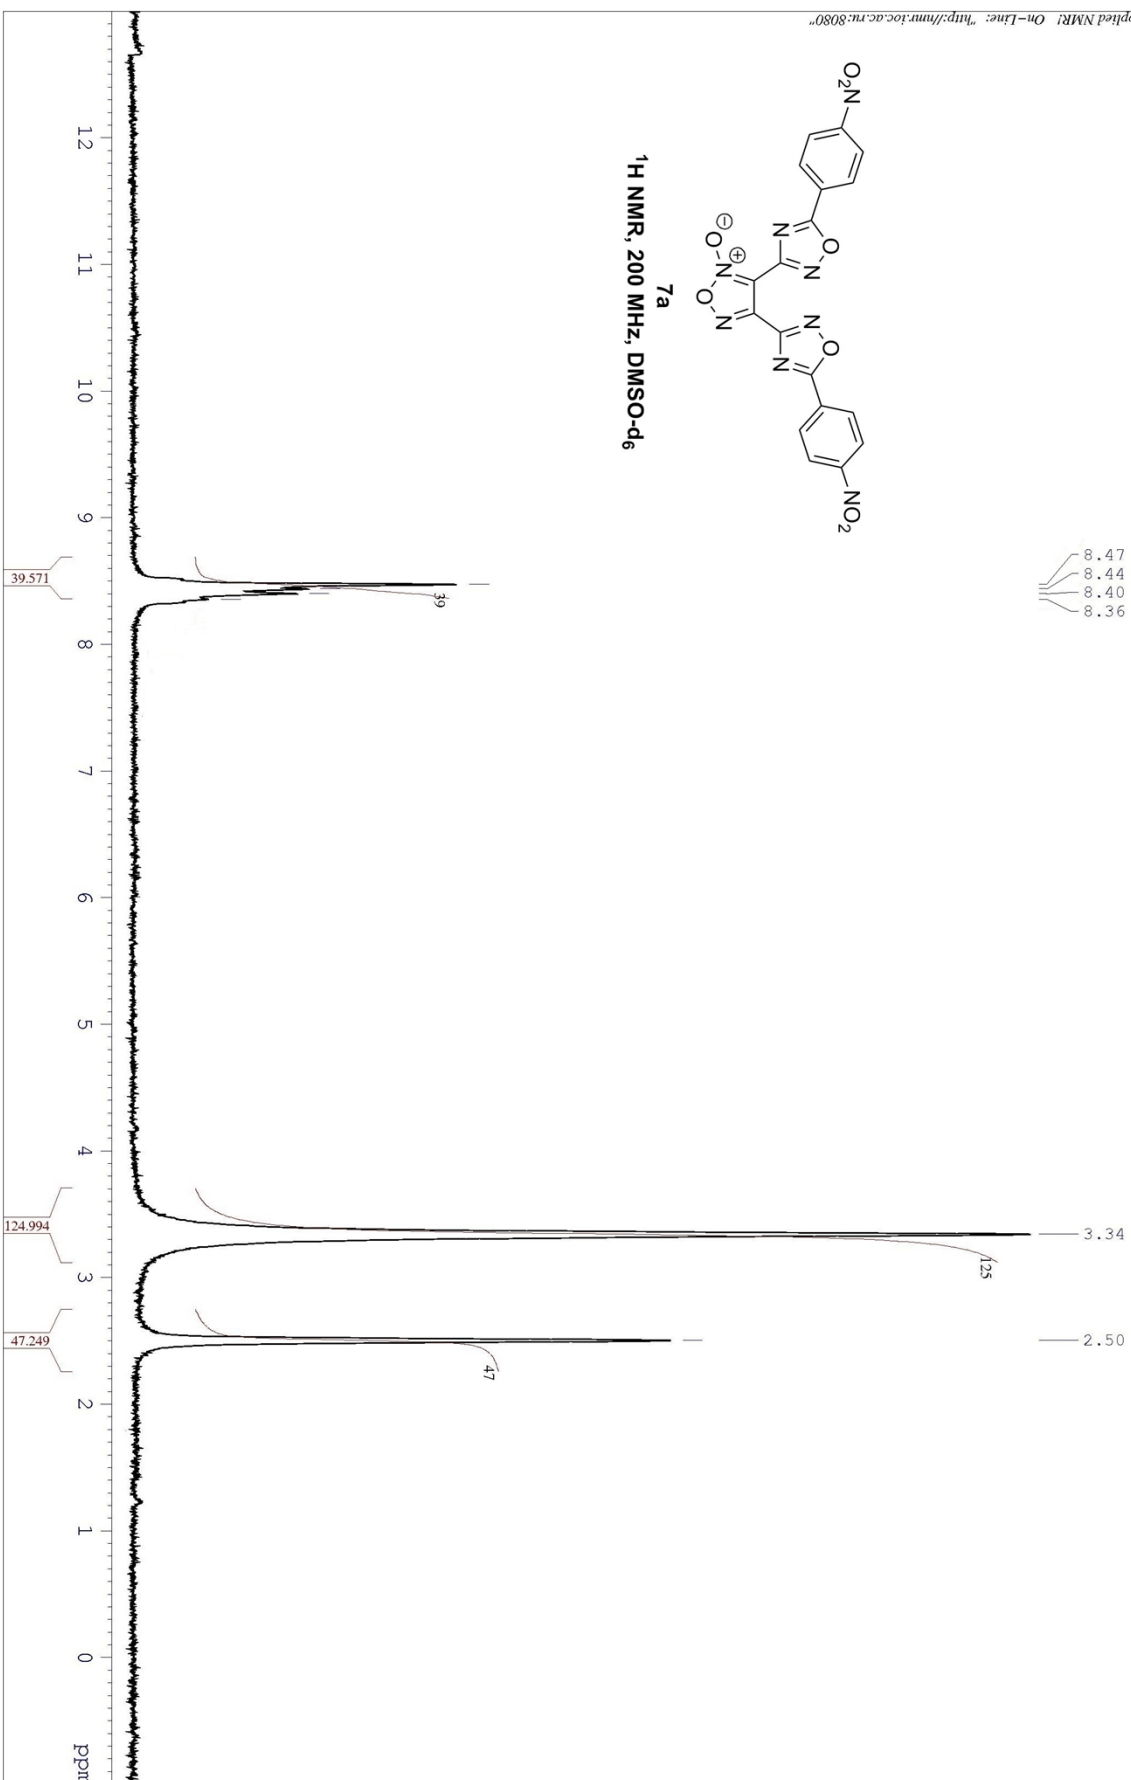

## Display Report

### Analysis Info

Analysis Name D:\Data\Kadentsev\2014\Fershtat\21-10-14-004.d  
Method tune\_wide.m  
Sample Name /USED 695  
Comment MeCN 100 %, Mw464 not calibrant added

Acquisition Date 21.10.2014 14:50:38

Operator BDAL@DE  
Instrument / Ser# micrOTOF 10248

### Acquisition Parameter

|             |            |                      |          |                  |           |
|-------------|------------|----------------------|----------|------------------|-----------|
| Source Type | ESI        | Ion Polarity         | Positive | Set Nebulizer    | 0.4 Bar   |
| Focus       | Not active |                      |          | Set Dry Heater   | 180 °C    |
| Scan Begin  | 50 m/z     | Set Capillary        | 4500 V   | Set Dry Gas      | 4.0 l/min |
| Scan End    | 3000 m/z   | Set End Plate Offset | -500 V   | Set Divert Valve | Waste     |

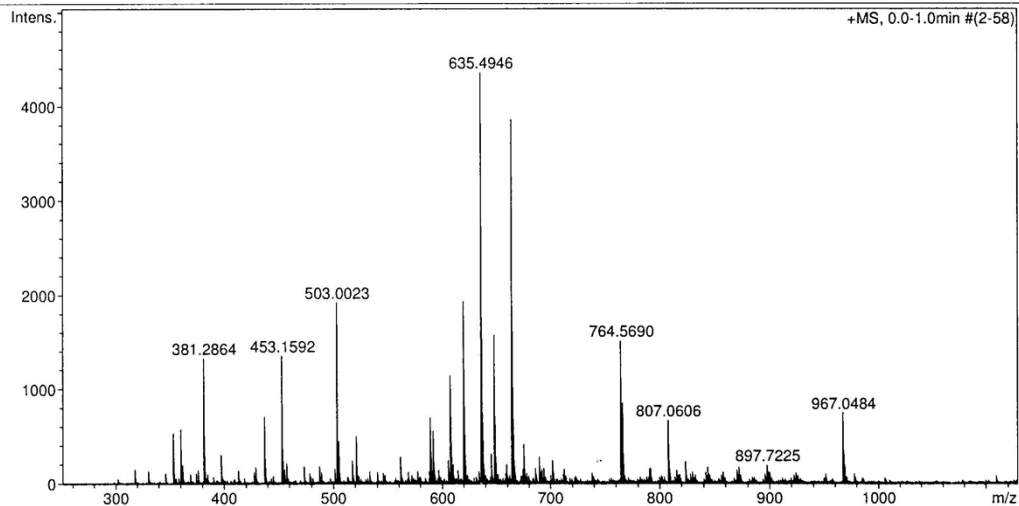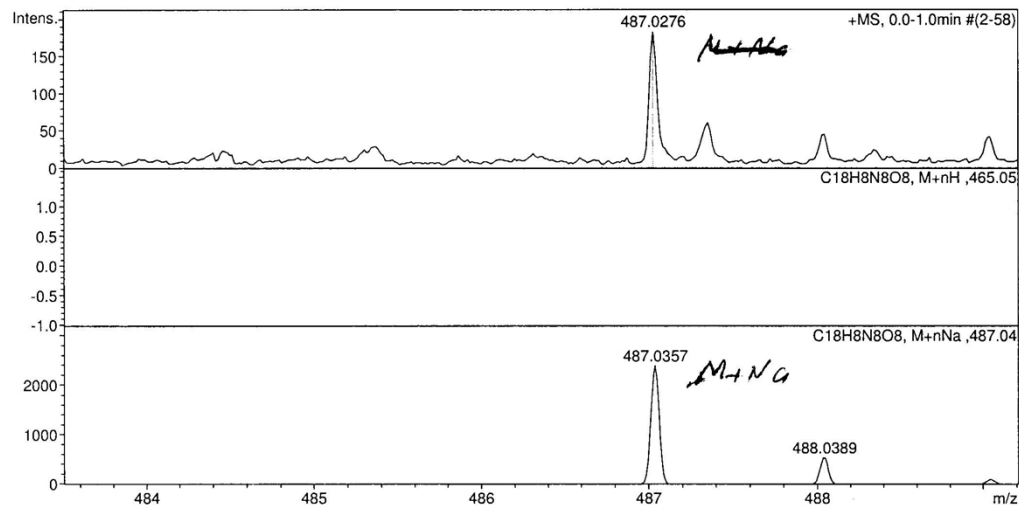

D:\EDL\735.0 ФЕРИТАТ. 735 , прессовка с KBr. 1/200.

24.02.2015

Page 1/1

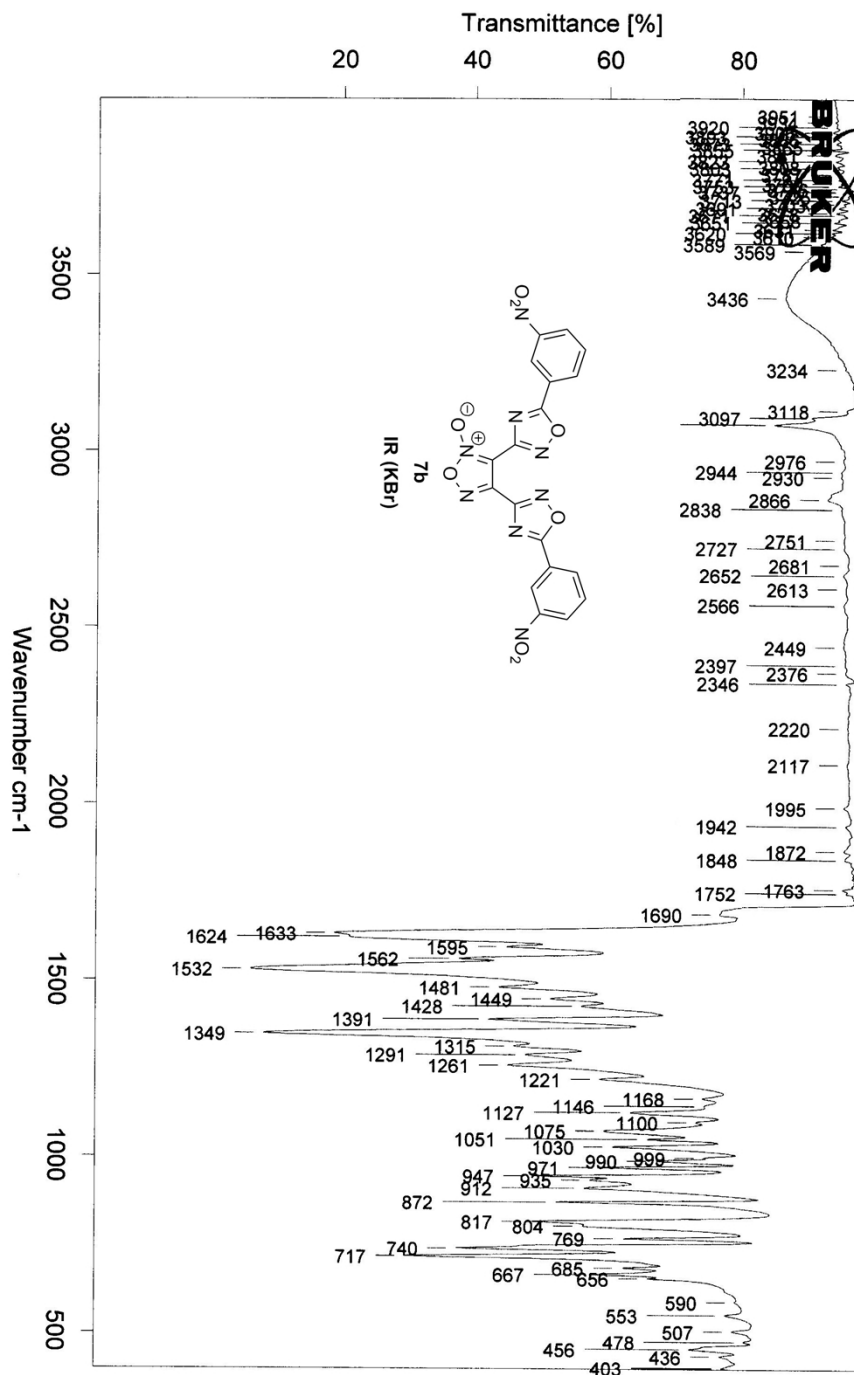

/USED 735

© Zelinsky Institute of Organic Chemistry, Moscow; Broker AC200 SF=200.13 MHz [1H] SI=16K SW=4000 OI=4888 PW=6.0 AQ=2.048 RD=3.00 NS=12 SR=3287.07 TF=297K 25 November 2014 Opr: Smutkova M.I.; Solv: DMSO-d6;

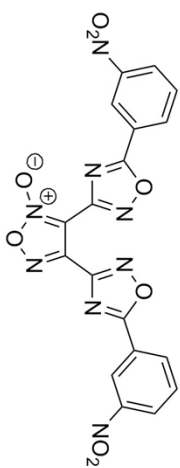

<sup>1</sup>H NMR, 200 MHz, DMSO-d<sub>6</sub>

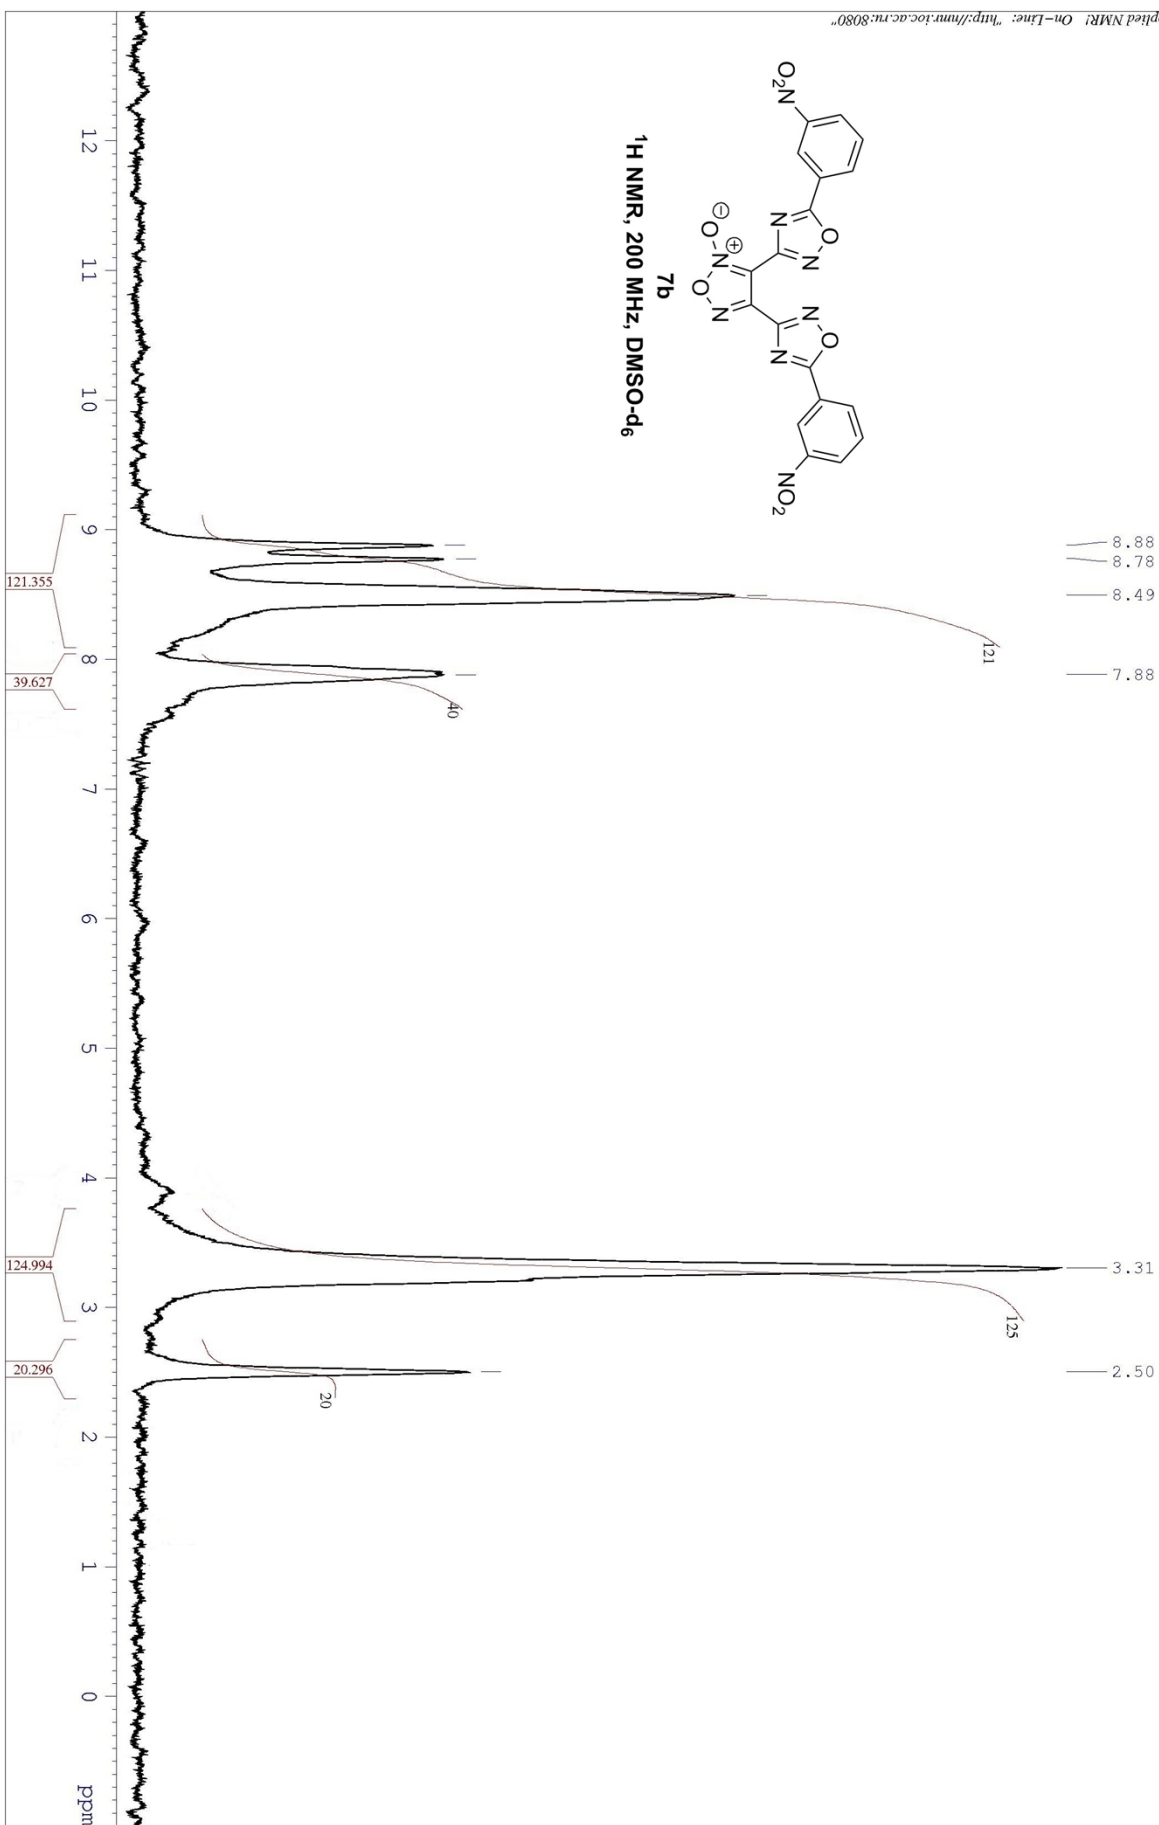

# /USED 735.C13

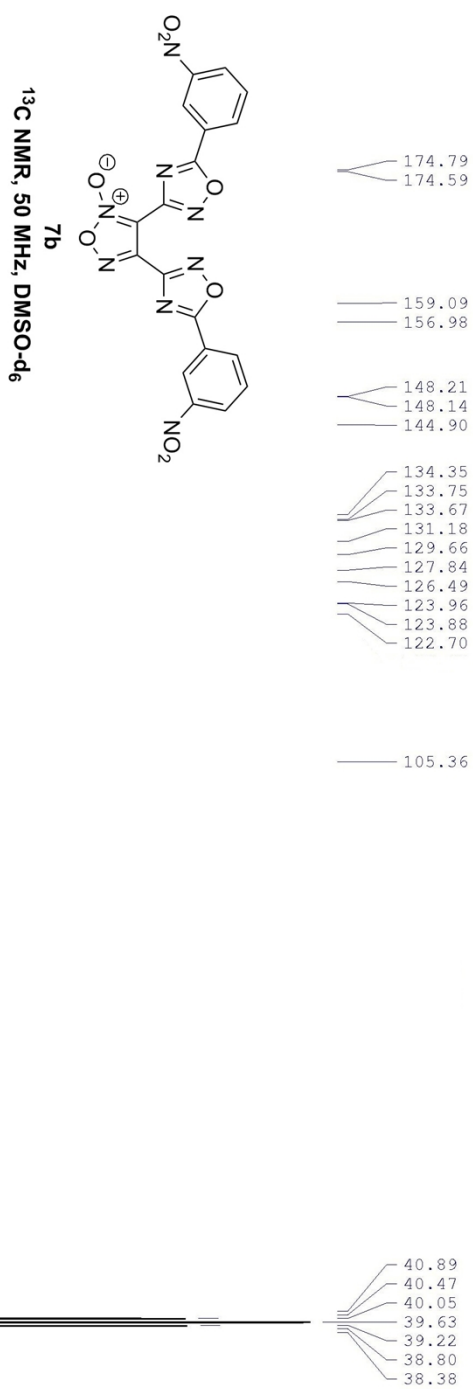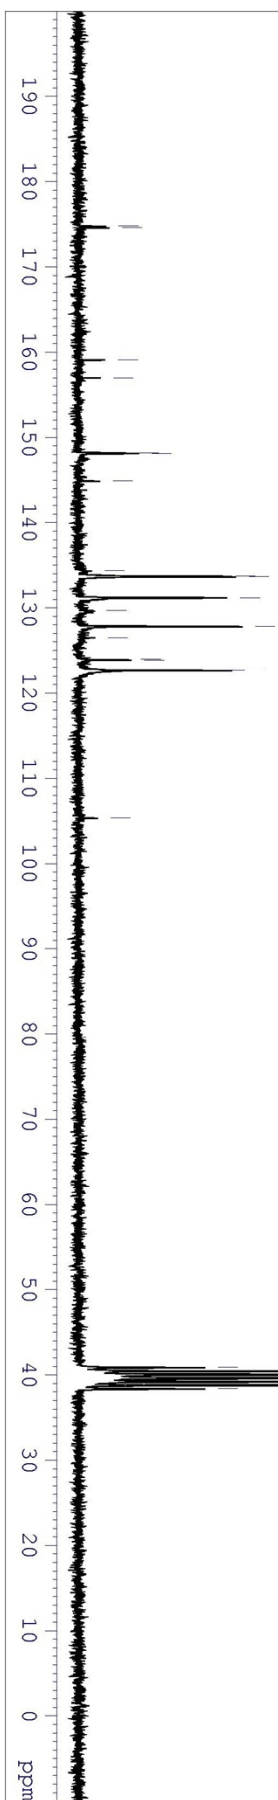

## Display Report

### Analysis Info

Analysis Name D:\Data\Kolotyrkina\2014\Fershtat\1211004.d  
Method tune\_wide.m  
Sample Name /USED 735  
Comment C18H8N8O8 mw 464 calibrant added

Acquisition Date 11.12.2014 12:07:02

Operator BDAL@DE  
Instrument / Ser# micrOTOF 10248

### Acquisition Parameter

|             |            |                      |          |                  |           |
|-------------|------------|----------------------|----------|------------------|-----------|
| Source Type | ESI        | Ion Polarity         | Positive | Set Nebulizer    | 0.4 Bar   |
| Focus       | Not active |                      |          | Set Dry Heater   | 180 °C    |
| Scan Begin  | 50 m/z     | Set Capillary        | 4500 V   | Set Dry Gas      | 4.0 l/min |
| Scan End    | 3000 m/z   | Set End Plate Offset | -500 V   | Set Divert Valve | Waste     |

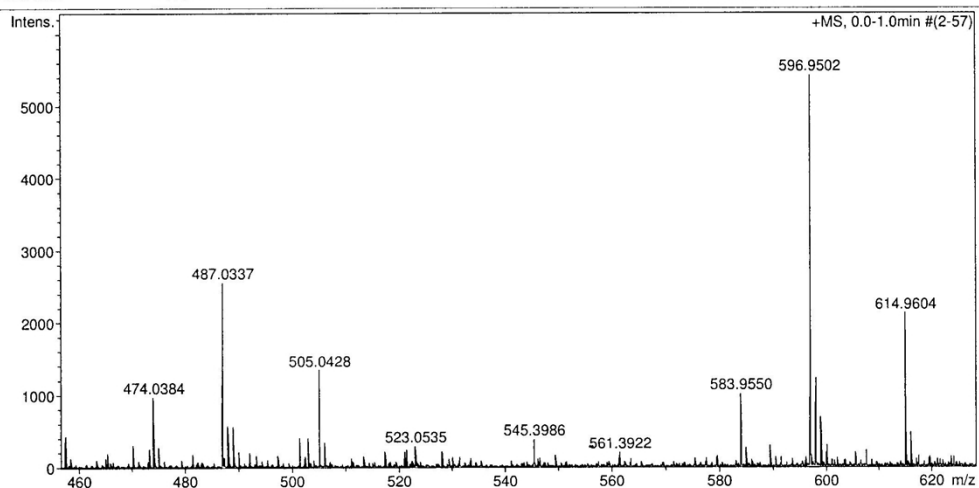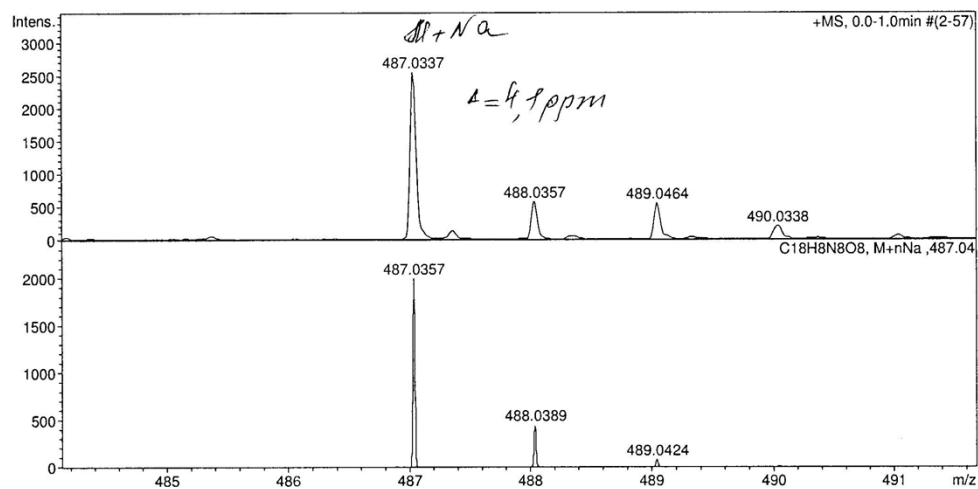



/USED 757

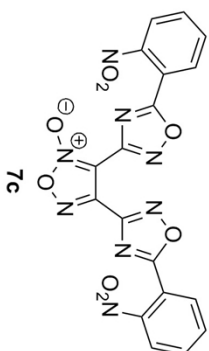

**7c**  
**<sup>1</sup>H NMR, 300 MHz, DMSO-d<sub>6</sub>**

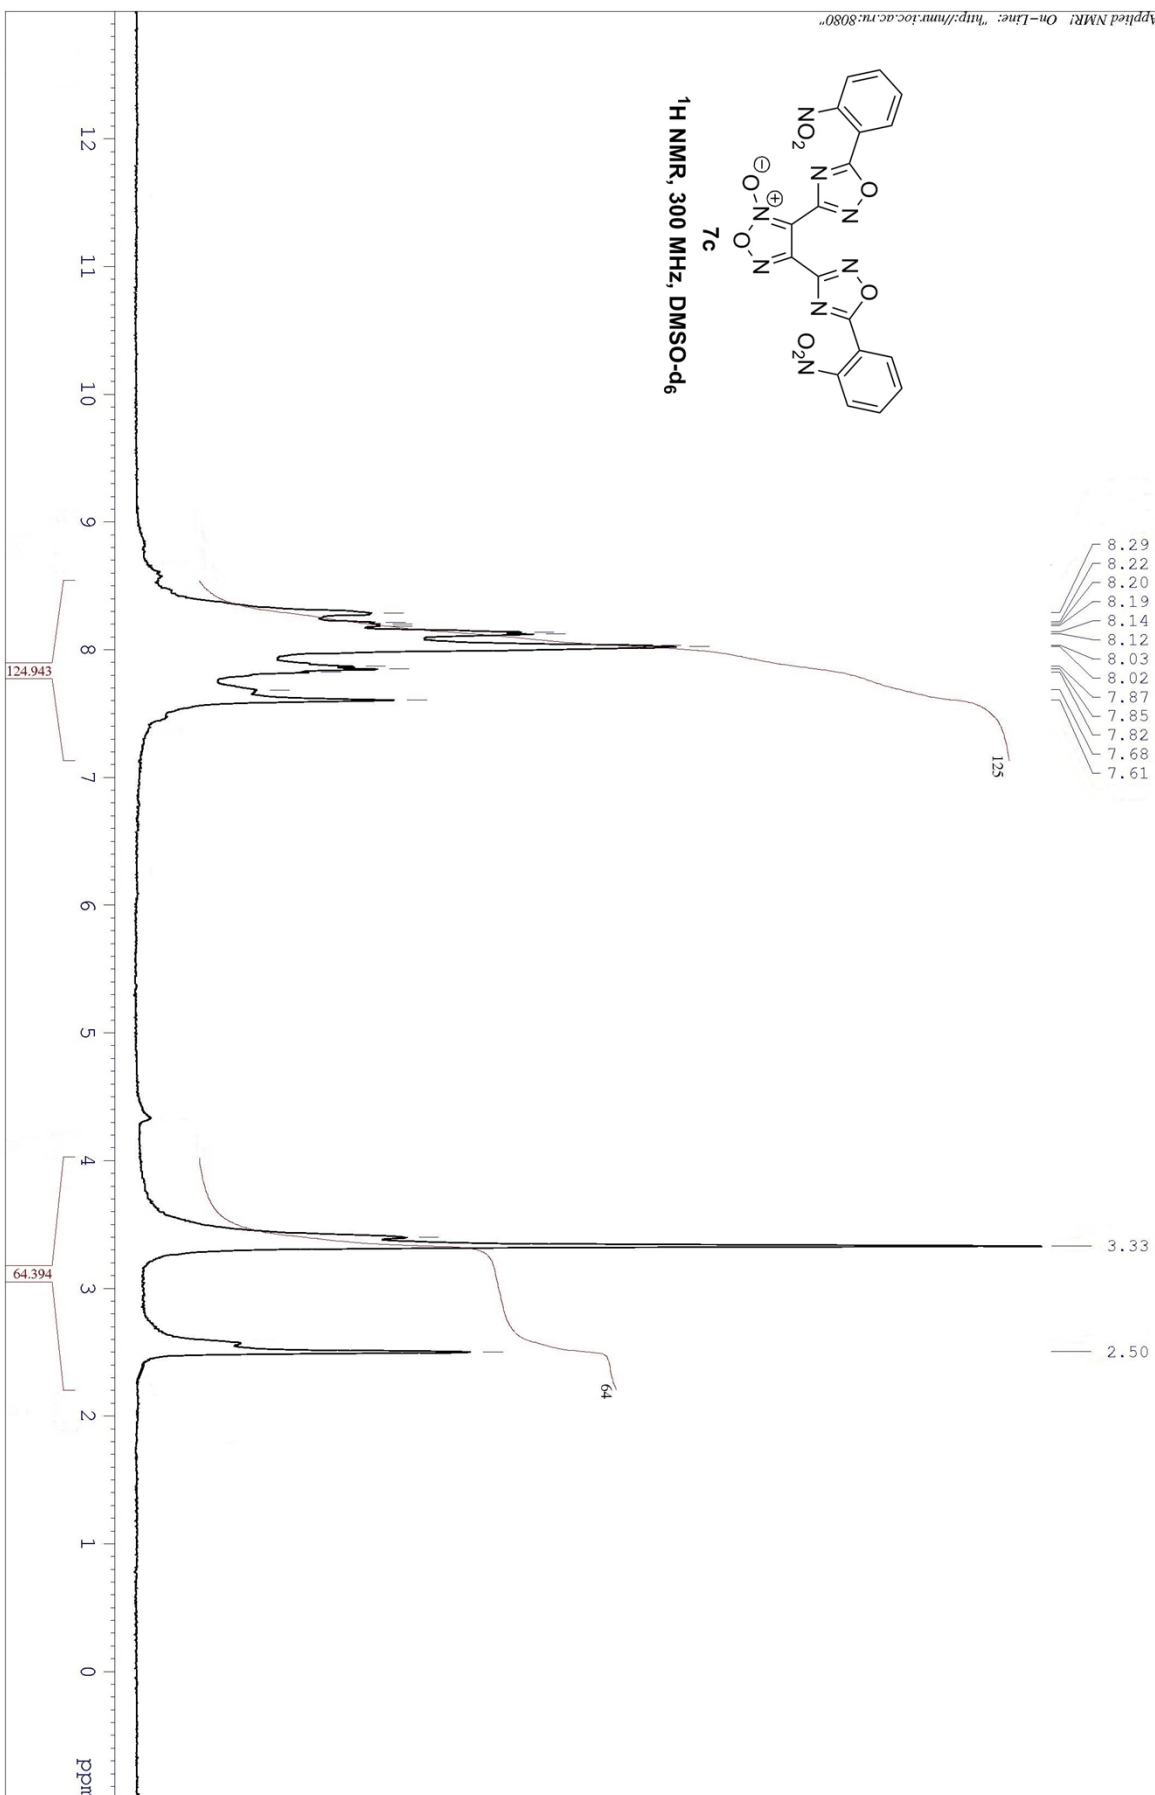

# /USED 757.C13

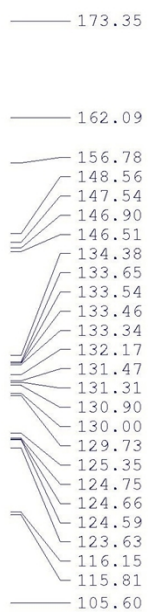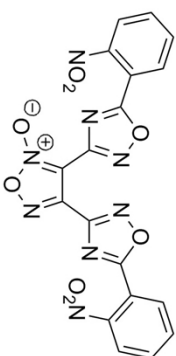

7c

<sup>13</sup>C NMR, 50 MHz, DMSO-d<sub>6</sub>

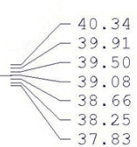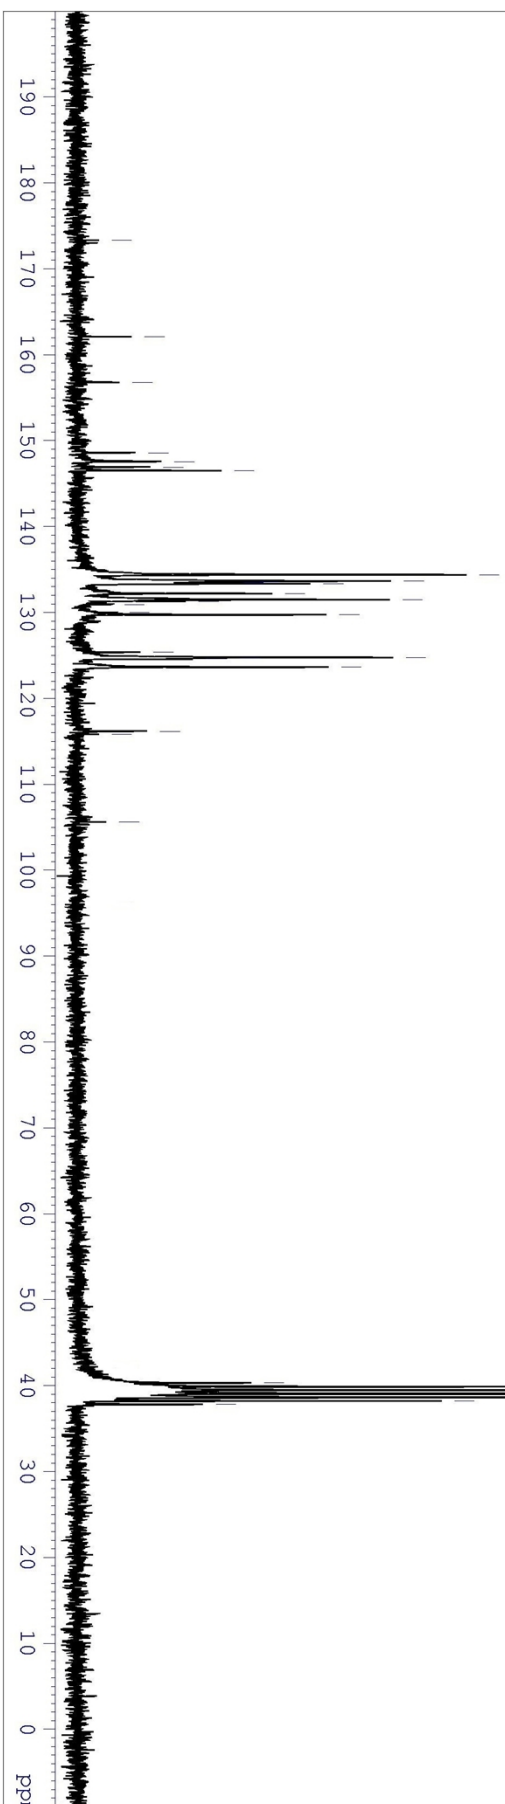

D:\EDULEO-742.0

ФЕПУТАТ. LEO-742, , прекобра с KBr, 1/200.

27.02.2015

Page 1/1

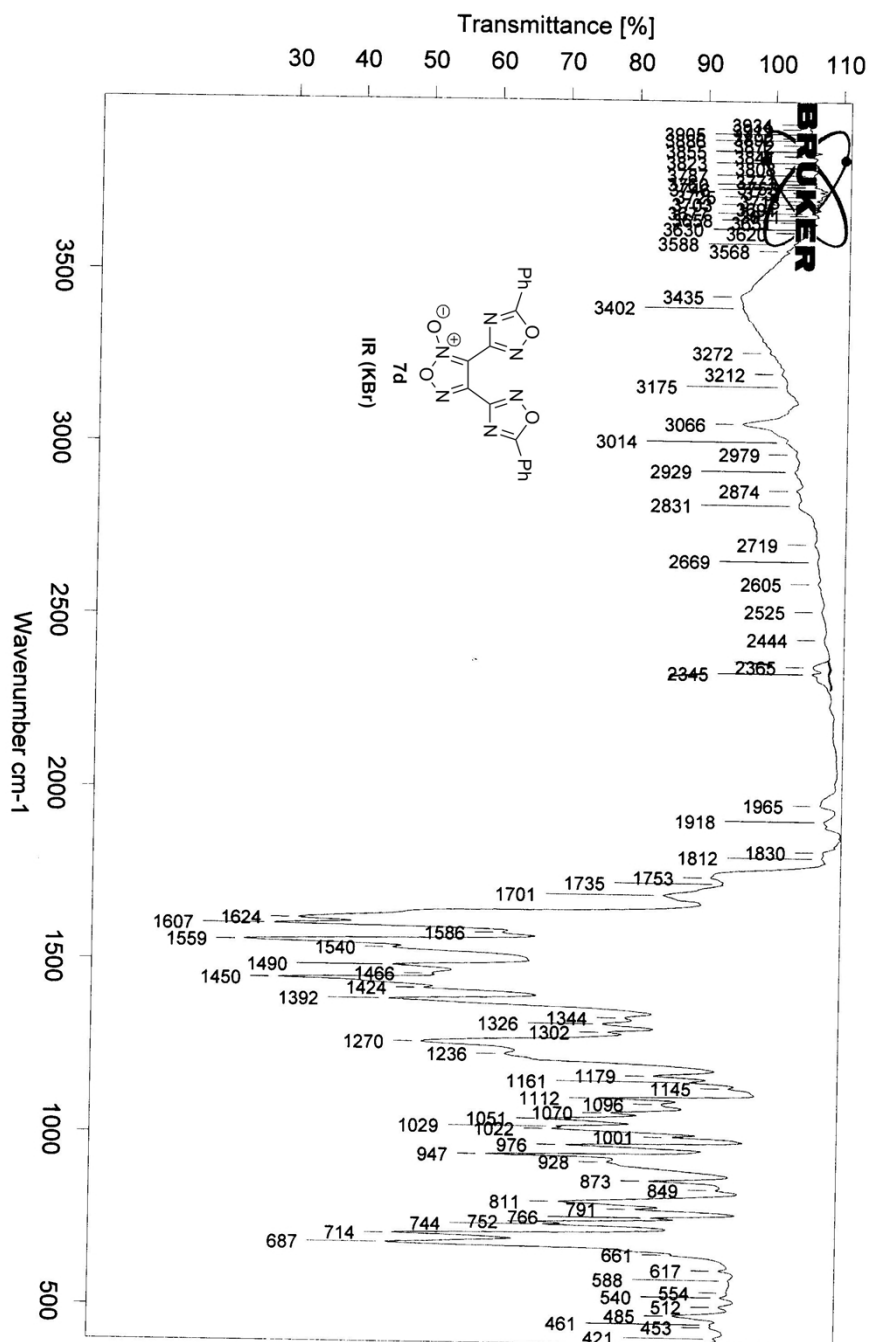

/USED 742

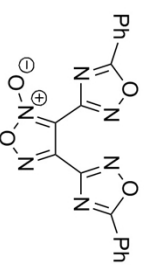

7d

<sup>1</sup>H NMR, 200 MHz, DMSO-d<sub>6</sub>

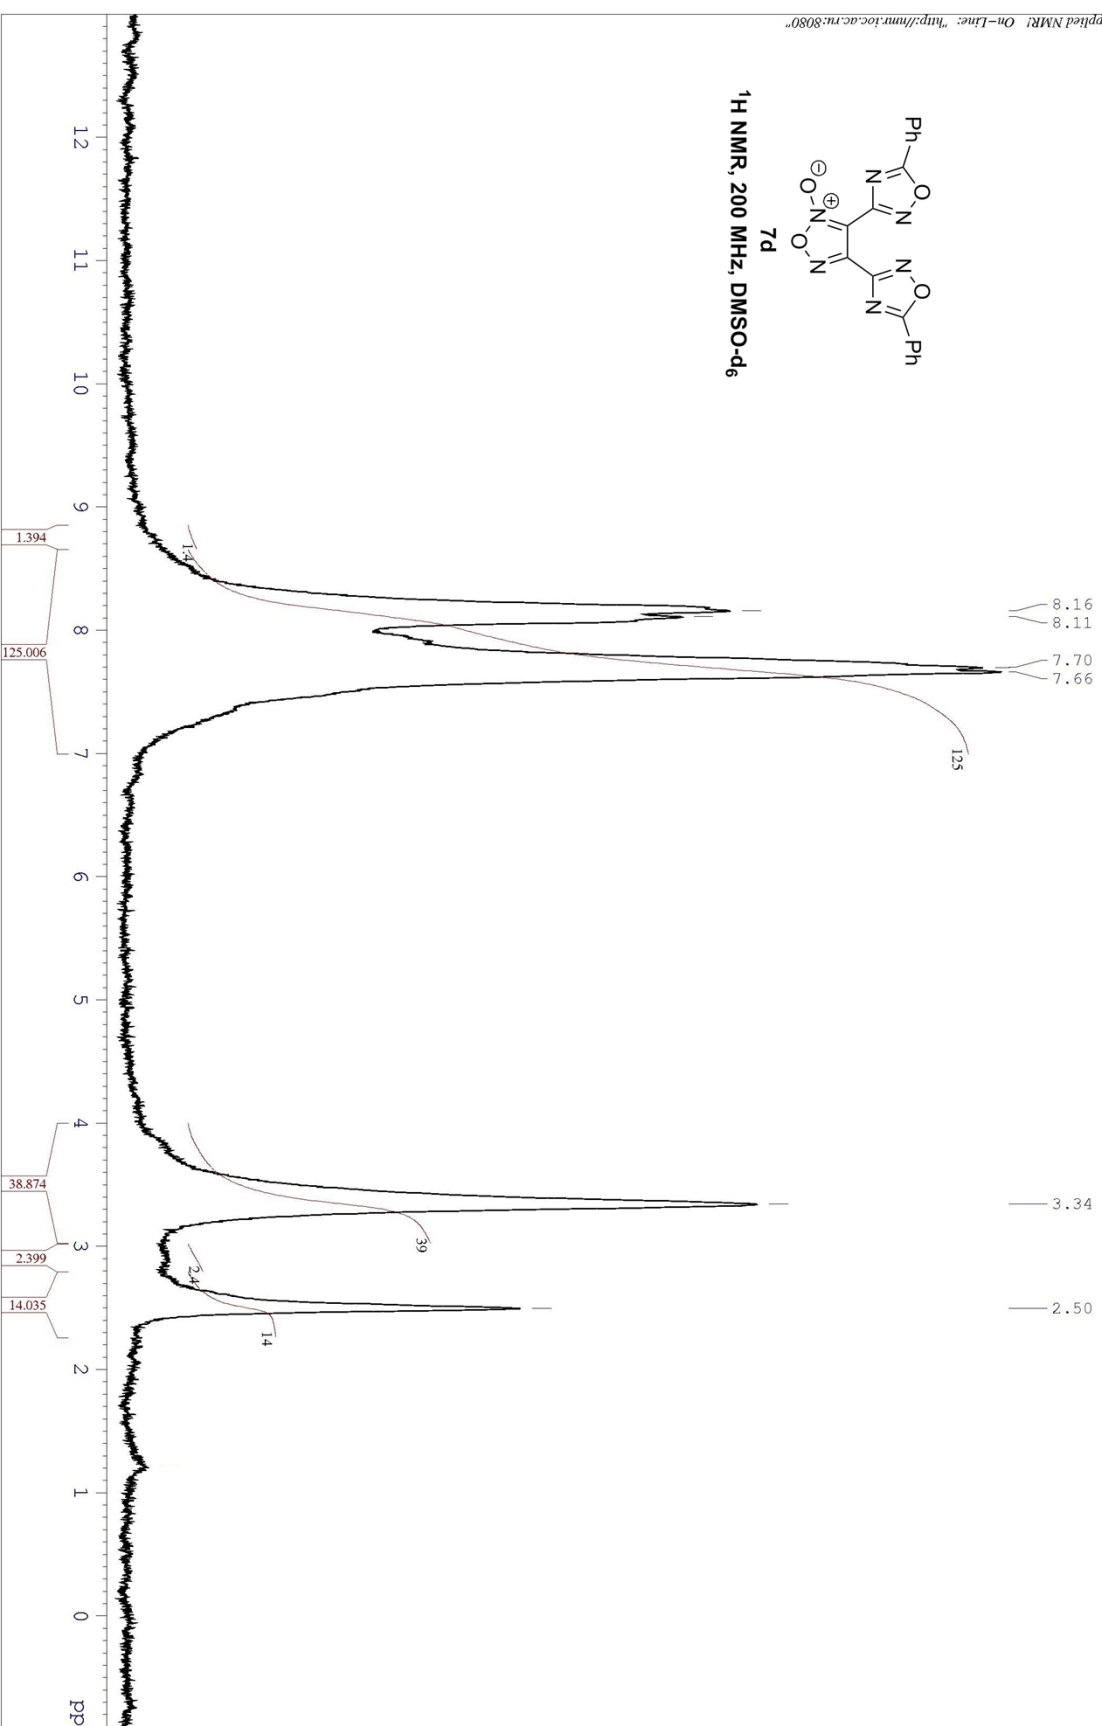

# /USED 742

179.11  
176.53

158.99  
156.93

145.55  
134.06  
132.32  
129.95  
129.81  
129.70  
129.55  
129.19  
129.15  
128.41  
128.32  
128.15  
128.03  
123.51  
122.45  
122.42  
122.31

40.45  
40.39  
40.29  
40.11  
39.83  
39.73  
39.55  
39.45  
39.28  
39.00  
38.86  
38.81  
38.72

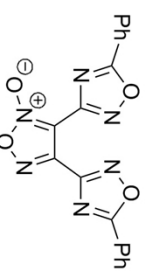

7d

<sup>13</sup>C NMR, 75.5 MHz, DMSO-d<sub>6</sub>

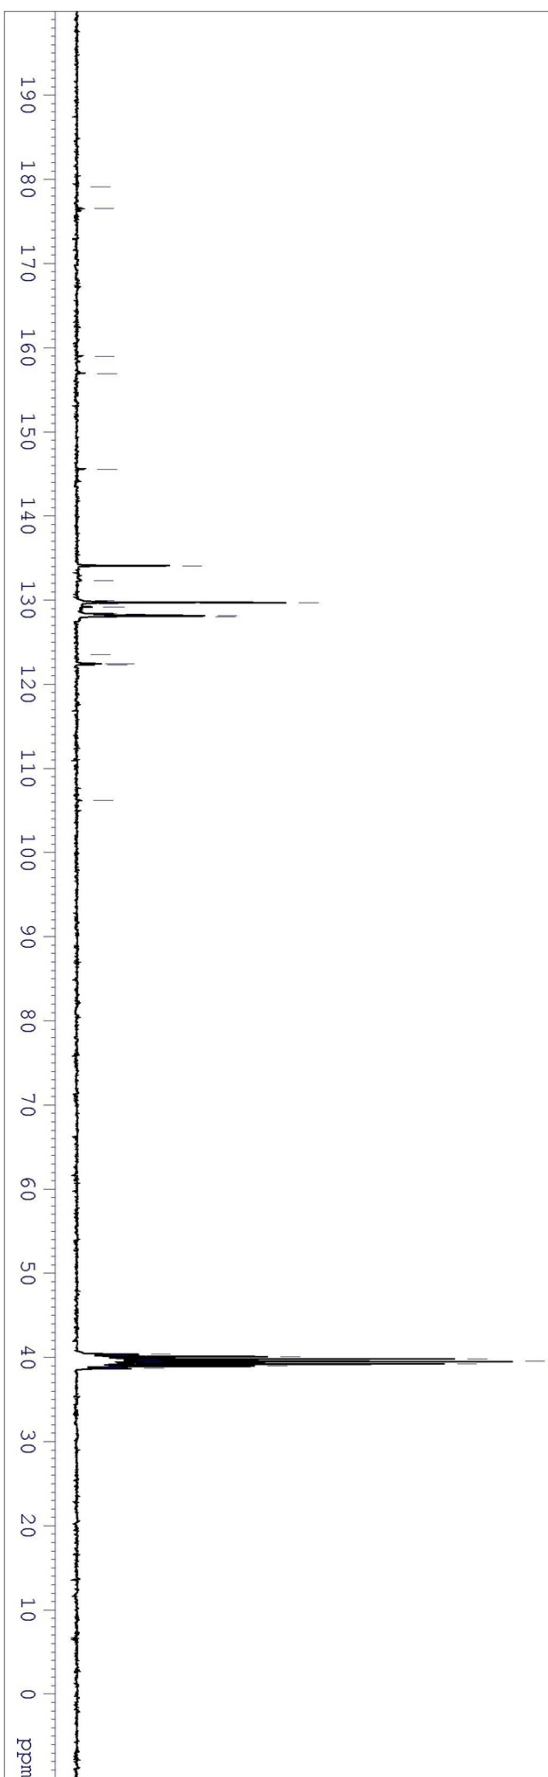

# /USED 789

© Zelinsky Institute of Organic Chemistry, Moscow; Bruker AC200 SF=200.13 MHz [1H] SI=16K SW=4000 OI=4888 PW=6.0 AQ=2.048 RD=3.00 NS=12 SR=3289.08 TF=297K 11 February 2015 Op: Struchkova M.I.; Solv: DMSO-d<sub>6</sub>.

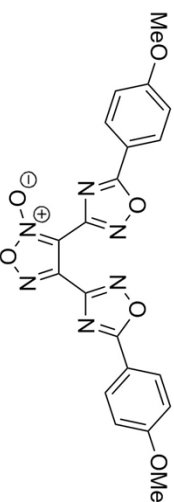

<sup>1</sup>H NMR, 200 MHz, DMSO-d<sub>6</sub>

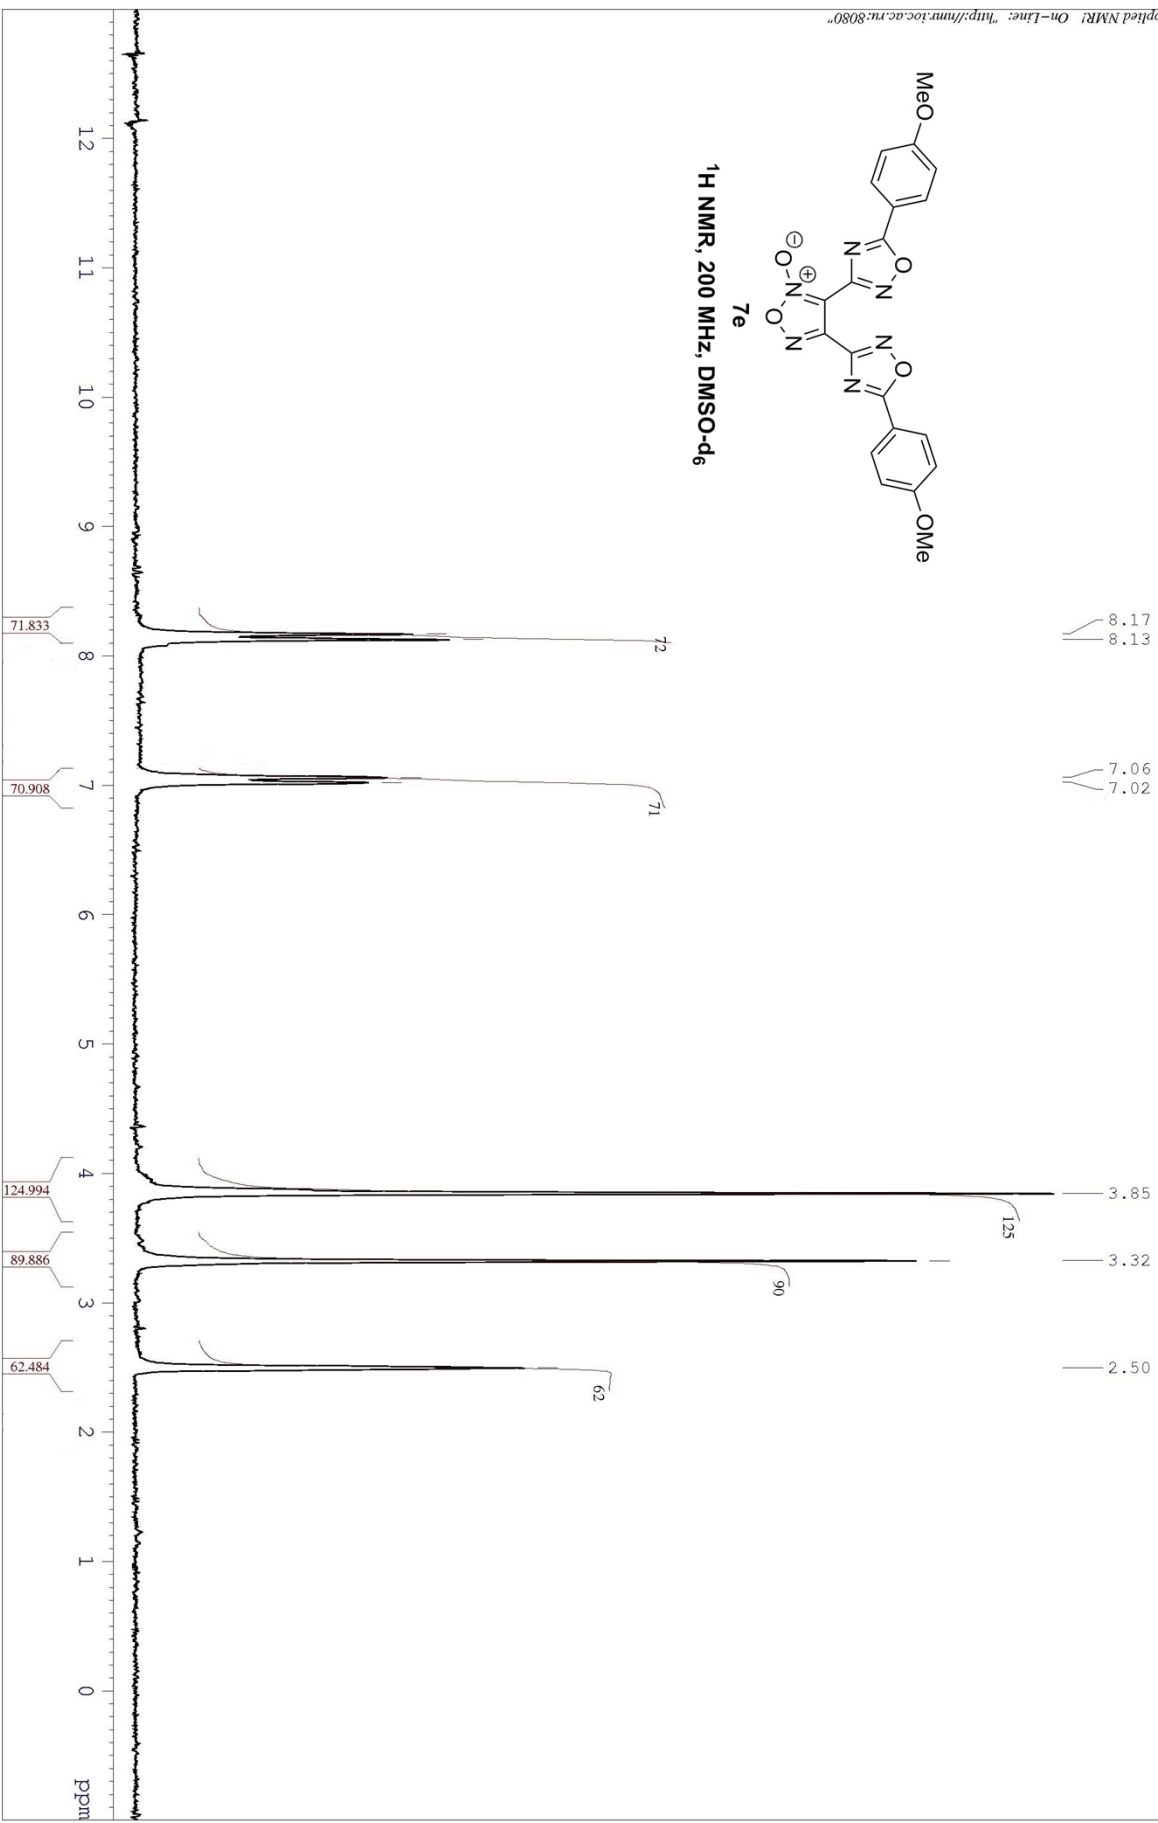

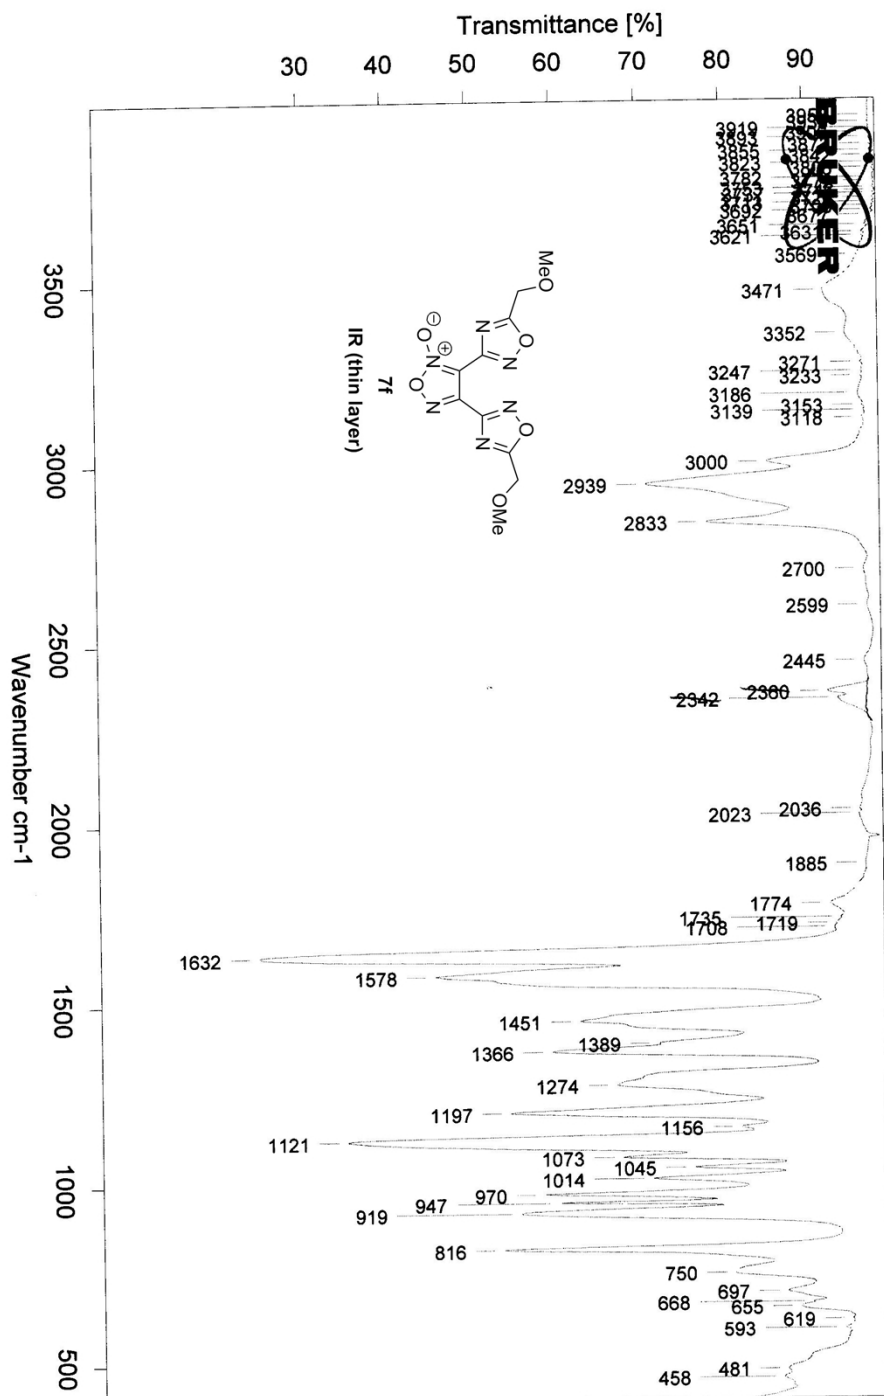

D:\EDL\LEO-746.0

ФЕРУЛАТ. LEO-746, тонкий слой, пл. KBr.

03.03.2015

# /USED 746

© Zelinsky Institute of Organic Chemistry, Moscow; Bruker AMX300 SF=300.13 MHz [1H] SF=16K SW=6010 O1=2401 PW=9.0 AQ=1.351 RD=3.00 NS=1 SR=-4.17 TE=300K 11 December 2014 Opr: Stuehlova M.L.; Solv: DMSO-d6;  
 The Best Applied NMR! On-Line: "http://nmr.ioc.ac.ru:8080"

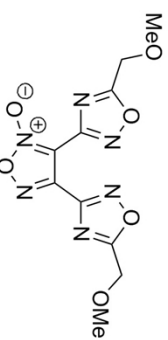

7f  
<sup>1</sup>H NMR, 300 MHz, DMSO-d<sub>6</sub>

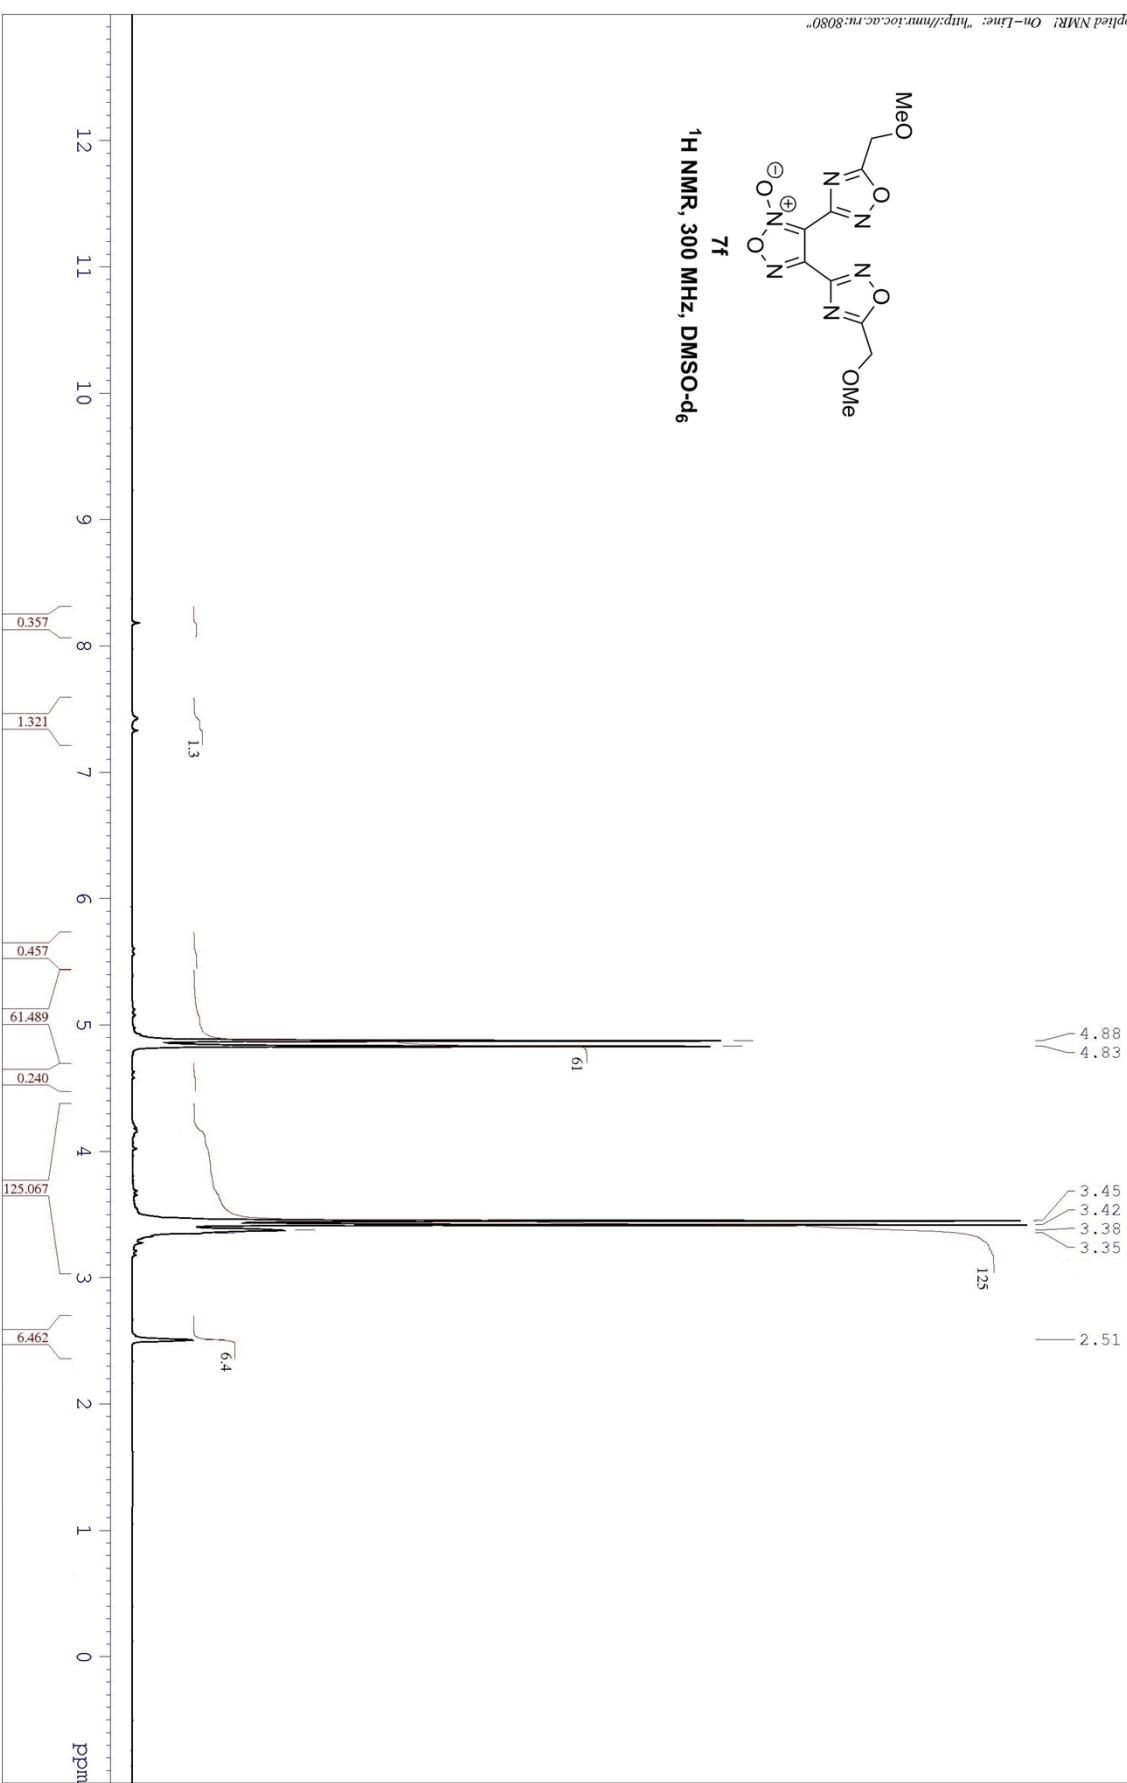



/USED 746.C13

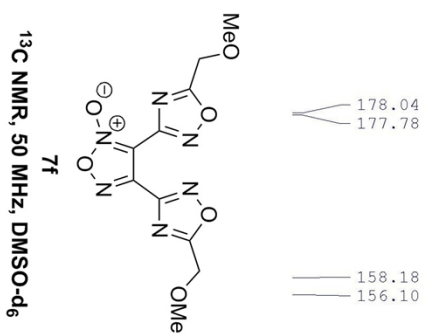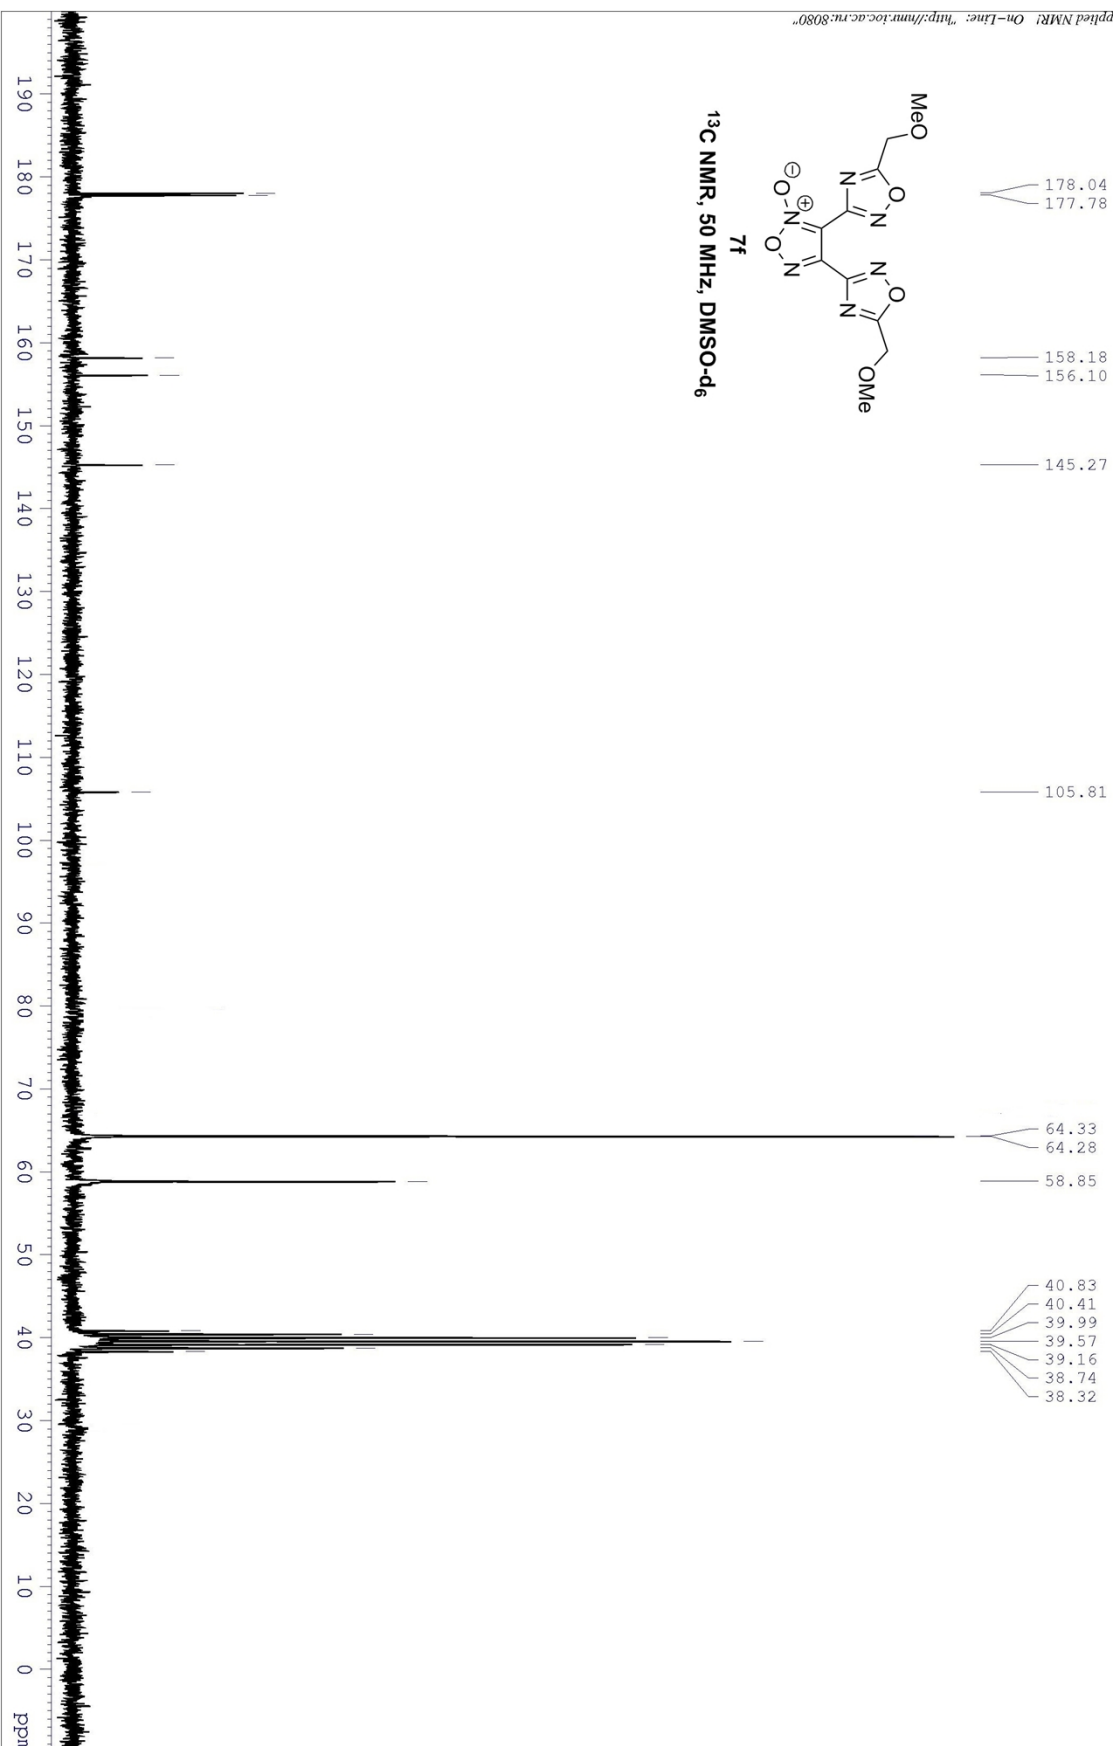

## Display Report

### Analysis Info

Analysis Name D:\Data\Chizhov\Makhova\Fershtat\746\_&clb.d  
Method tune\_wide.m  
Sample Name /USED 746  
Comment CH3CN 100 %, dil. 200, calibrant added

Acquisition Date 02.04.2015 14:52:02

Operator BDAL@DE  
Instrument / Ser# micrOTOF 10248

### Acquisition Parameter

|             |            |                      |          |                  |           |
|-------------|------------|----------------------|----------|------------------|-----------|
| Source Type | ESI        | Ion Polarity         | Positive | Set Nebulizer    | 0.4 Bar   |
| Focus       | Not active |                      |          | Set Dry Heater   | 180 °C    |
| Scan Begin  | 50 m/z     | Set Capillary        | 4500 V   | Set Dry Gas      | 4.0 l/min |
| Scan End    | 3000 m/z   | Set End Plate Offset | -500 V   | Set Divert Valve | Waste     |

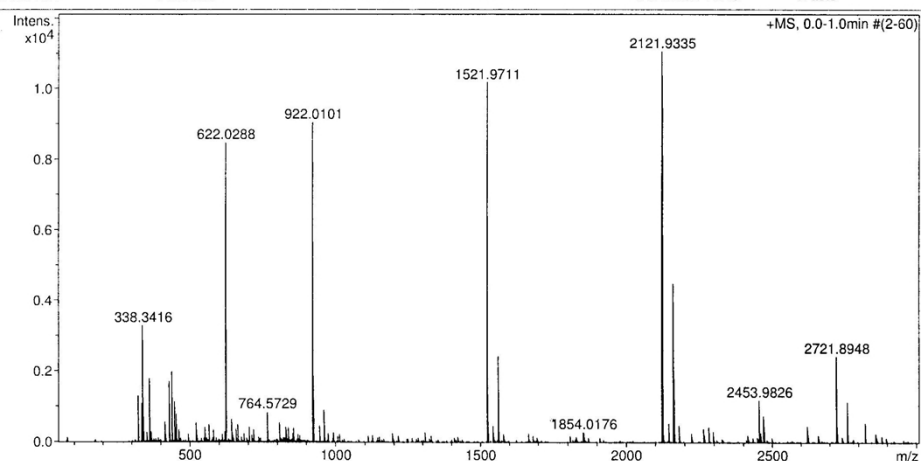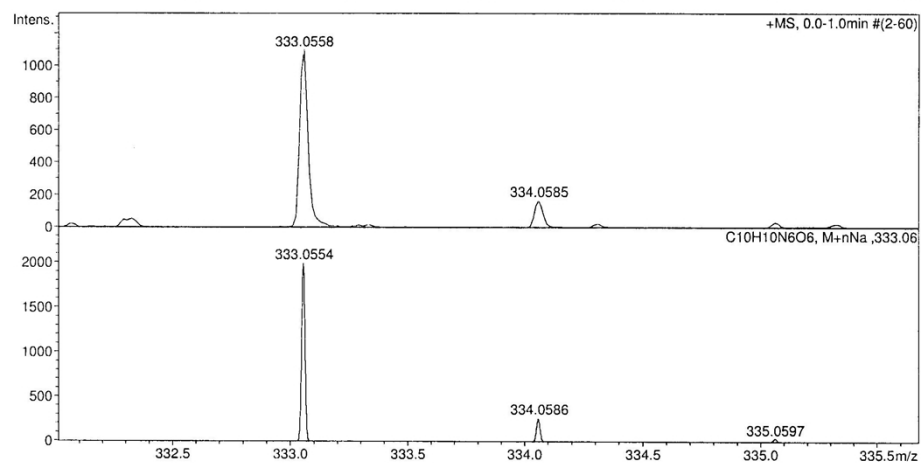

/USED 740

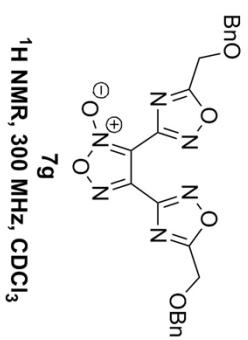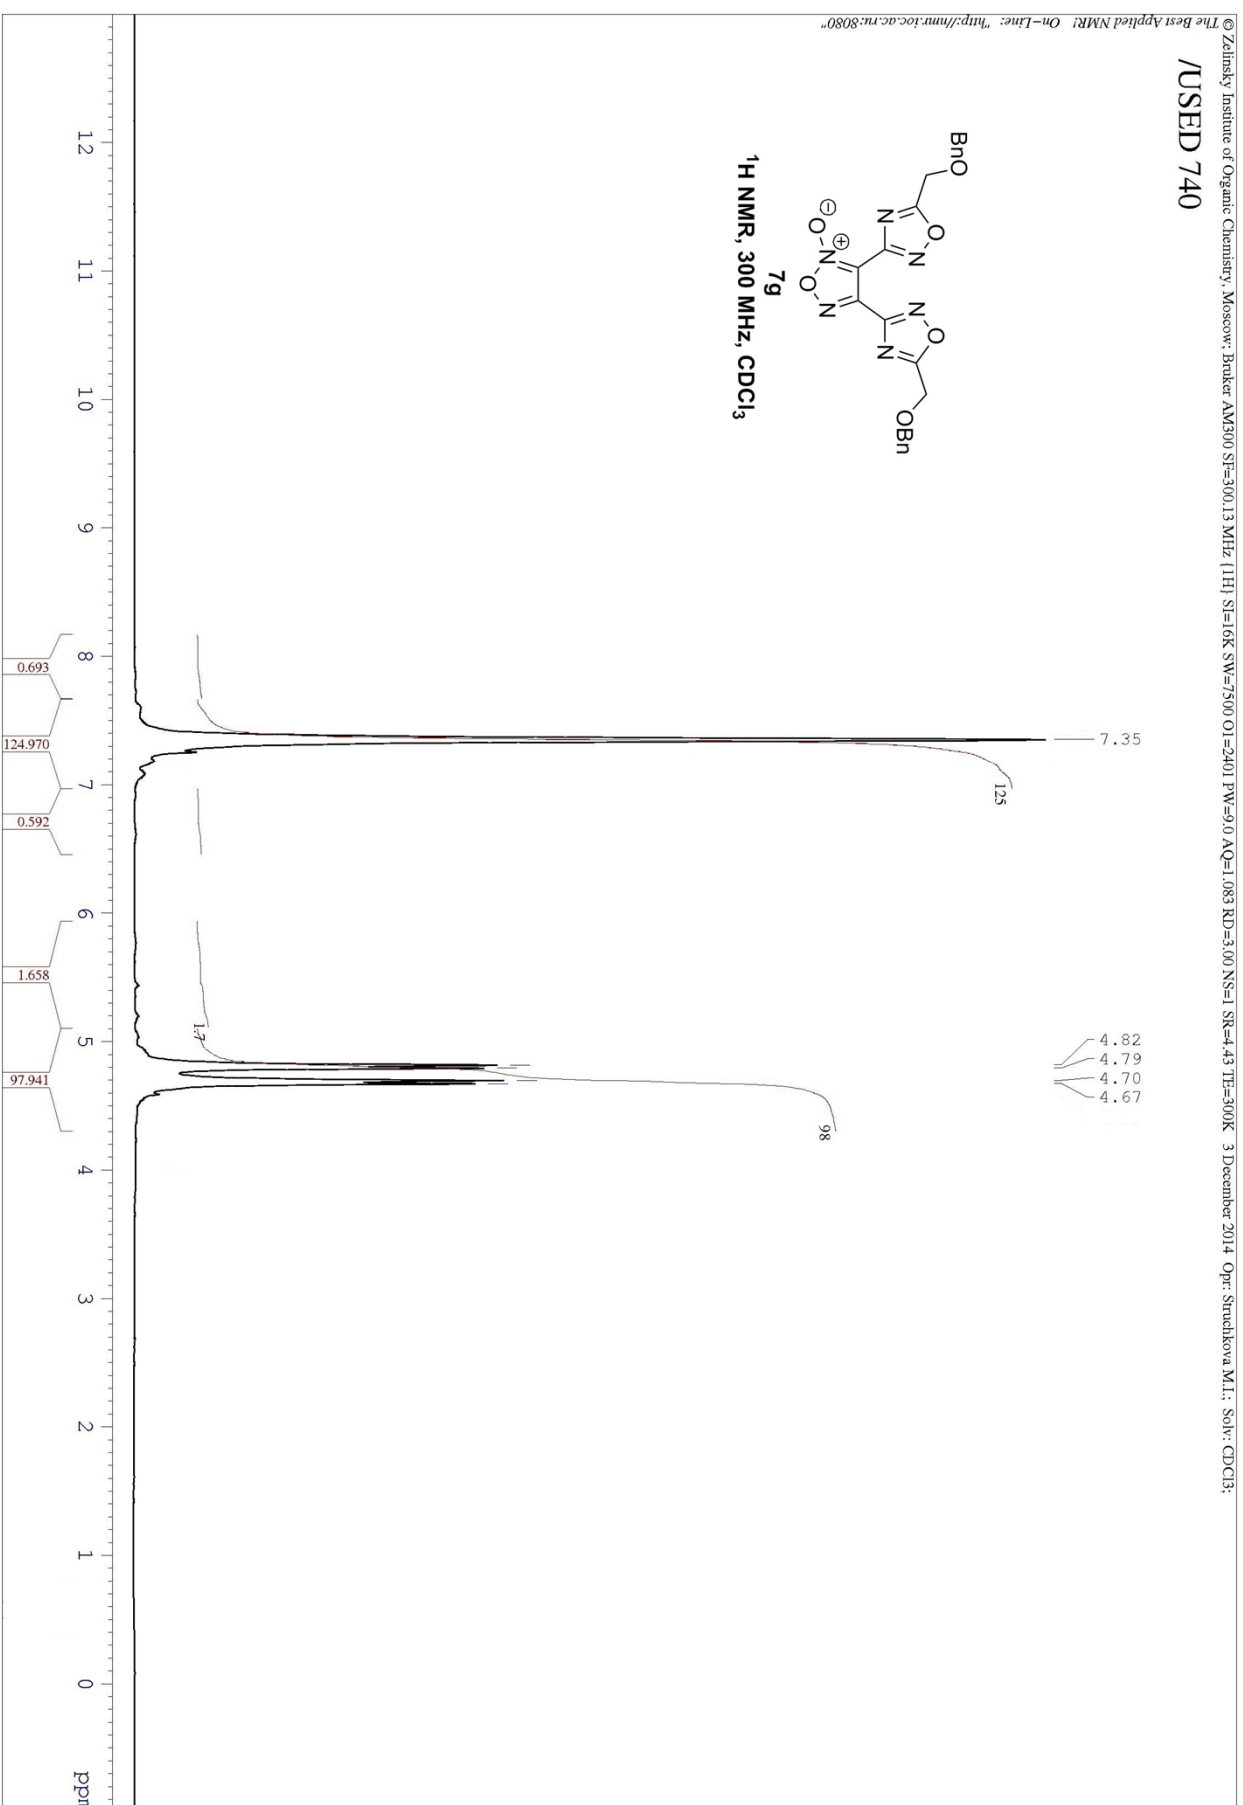

/USED 740.C13

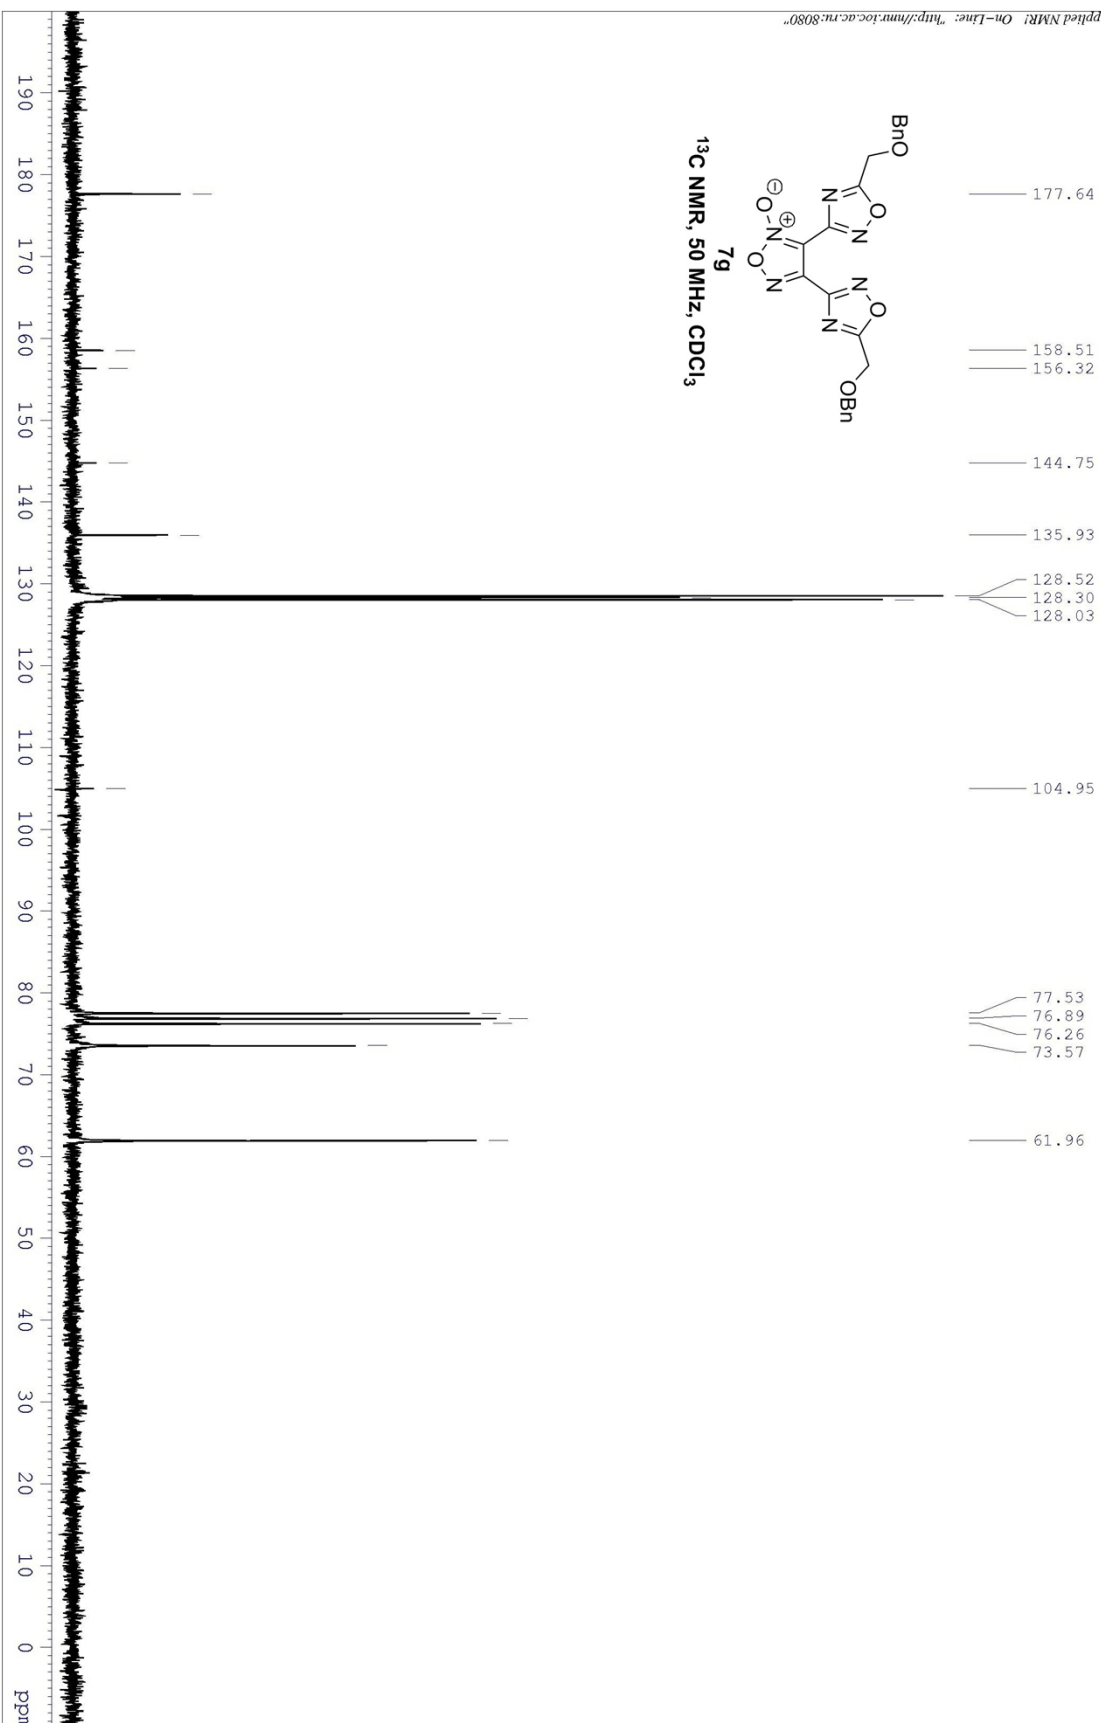

## Display Report

### Analysis Info

Analysis Name D:\Data\Chizhov\Makhova\Fershtat\740\_&clb.d  
Method tune\_wide.m  
Sample Name /USED 740  
Comment CH3CN 100 %, dil. 200, calibrant added

Acquisition Date 02.04.2015 14:46:31

Operator BDAL@DE  
Instrument / Ser# micrOTOF 10248

### Acquisition Parameter

|             |            |                      |          |                  |           |
|-------------|------------|----------------------|----------|------------------|-----------|
| Source Type | ESI        | Ion Polarity         | Positive | Set Nebulizer    | 0.4 Bar   |
| Focus       | Not active |                      |          | Set Dry Heater   | 180 °C    |
| Scan Begin  | 50 m/z     | Set Capillary        | 4500 V   | Set Dry Gas      | 4.0 l/min |
| Scan End    | 3000 m/z   | Set End Plate Offset | -500 V   | Set Divert Valve | Waste     |

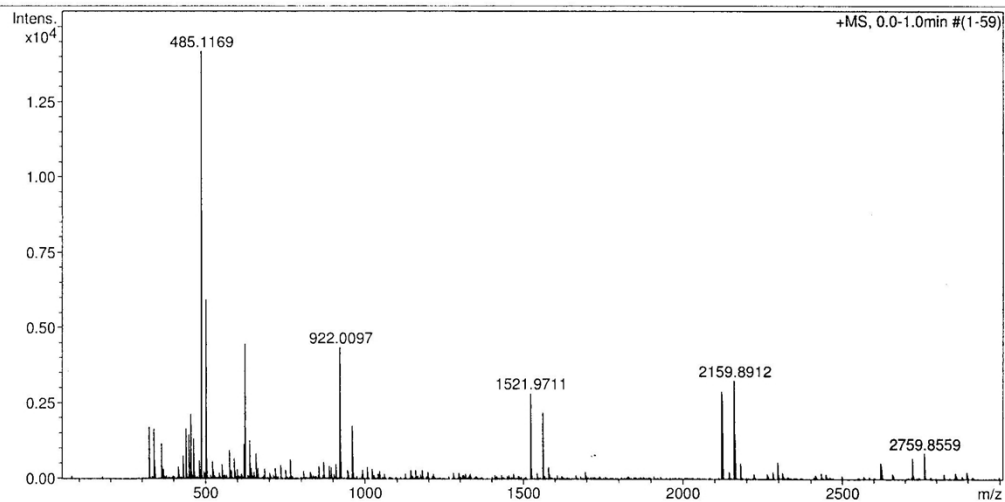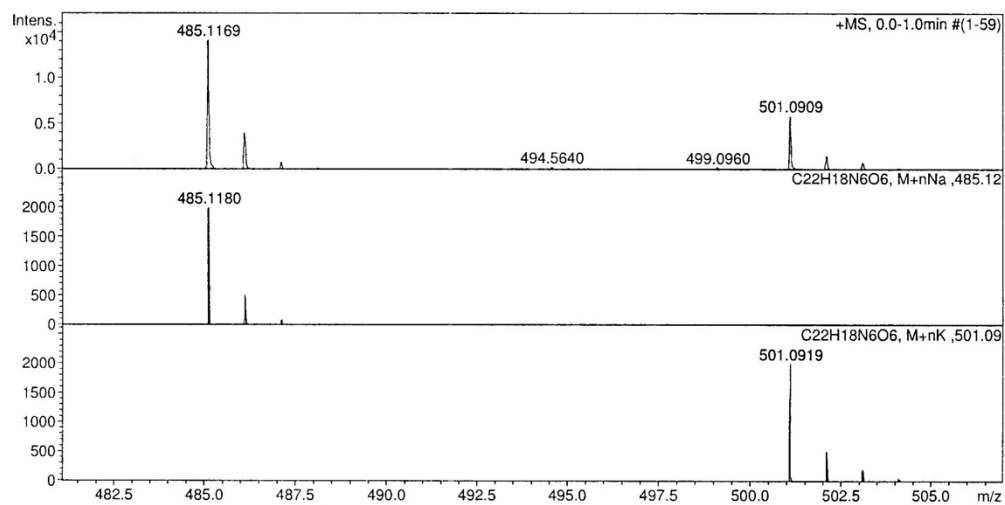

# /USED 754

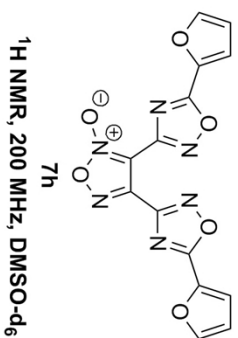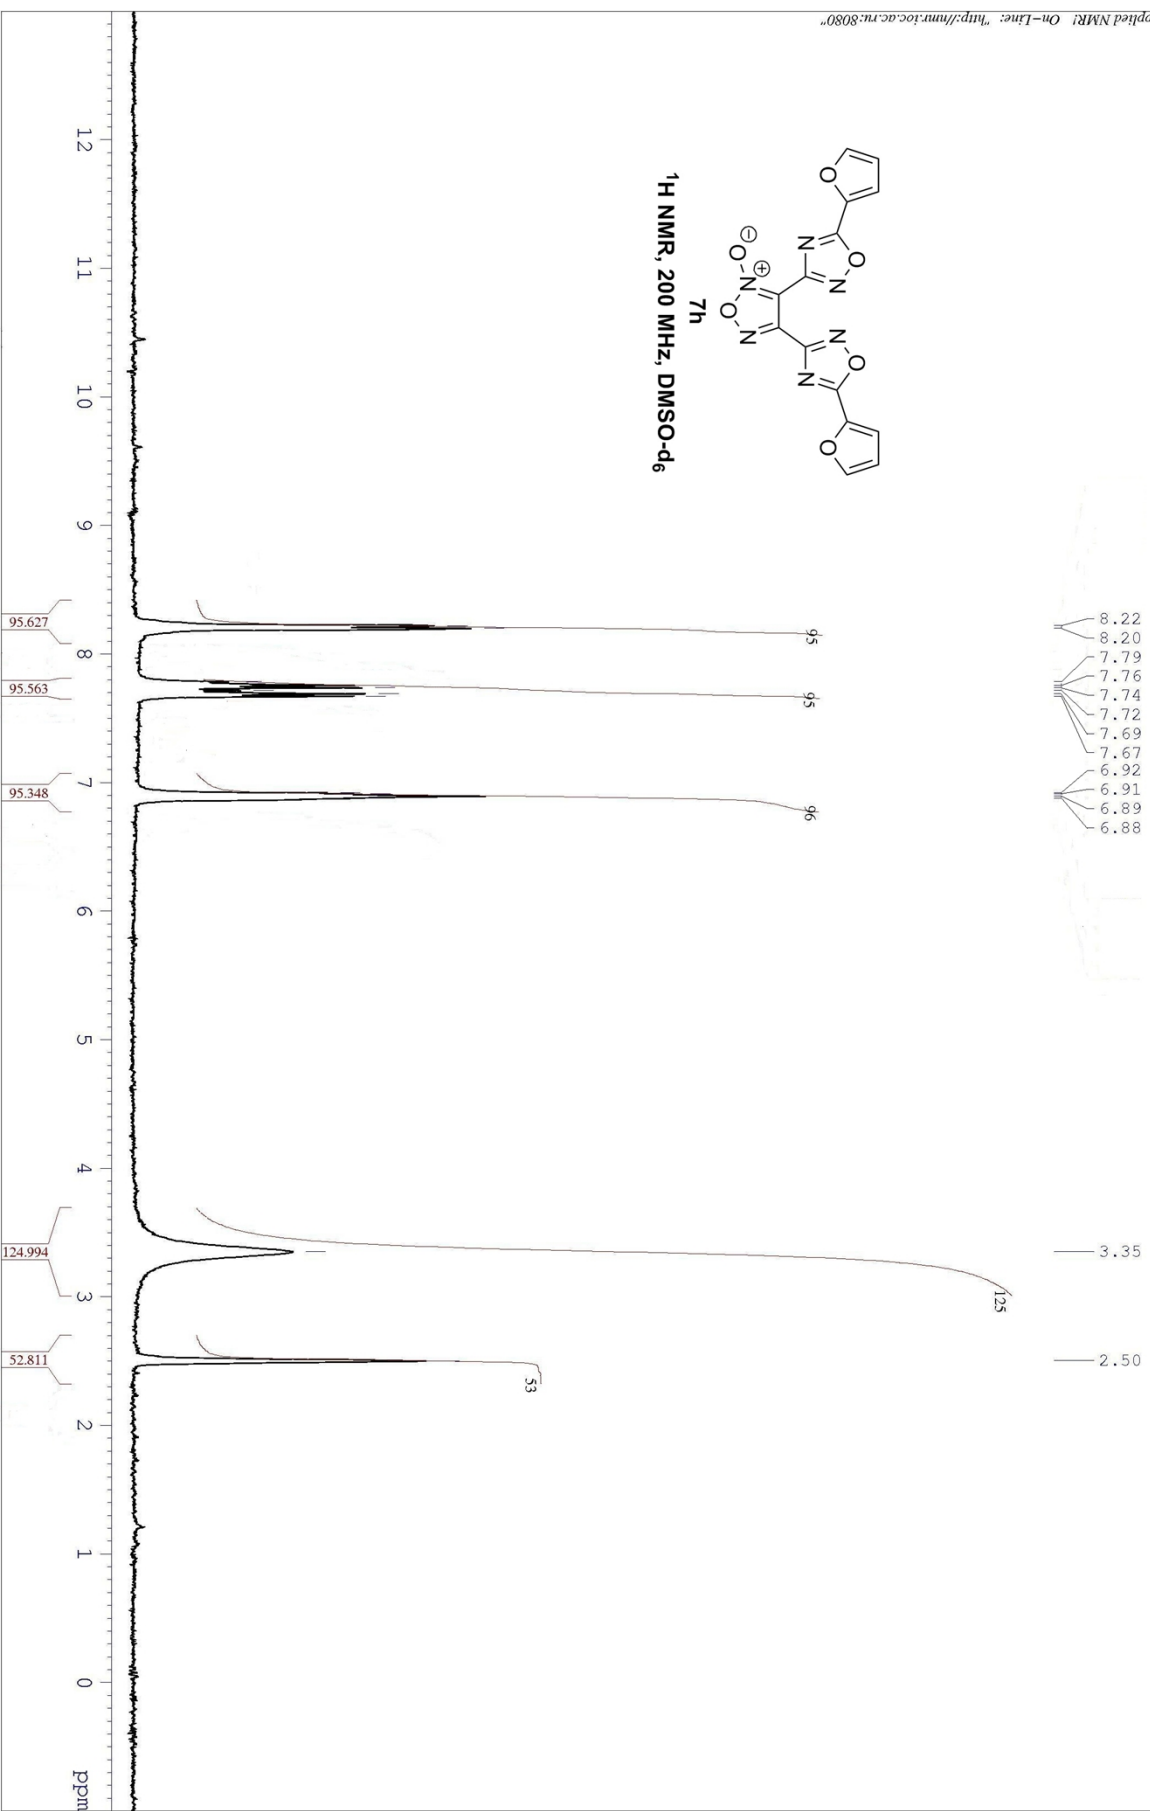

/USED 754.C13

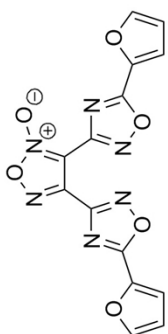

7h

<sup>13</sup>C NMR, 50 MHz, DMSO-d<sub>6</sub>

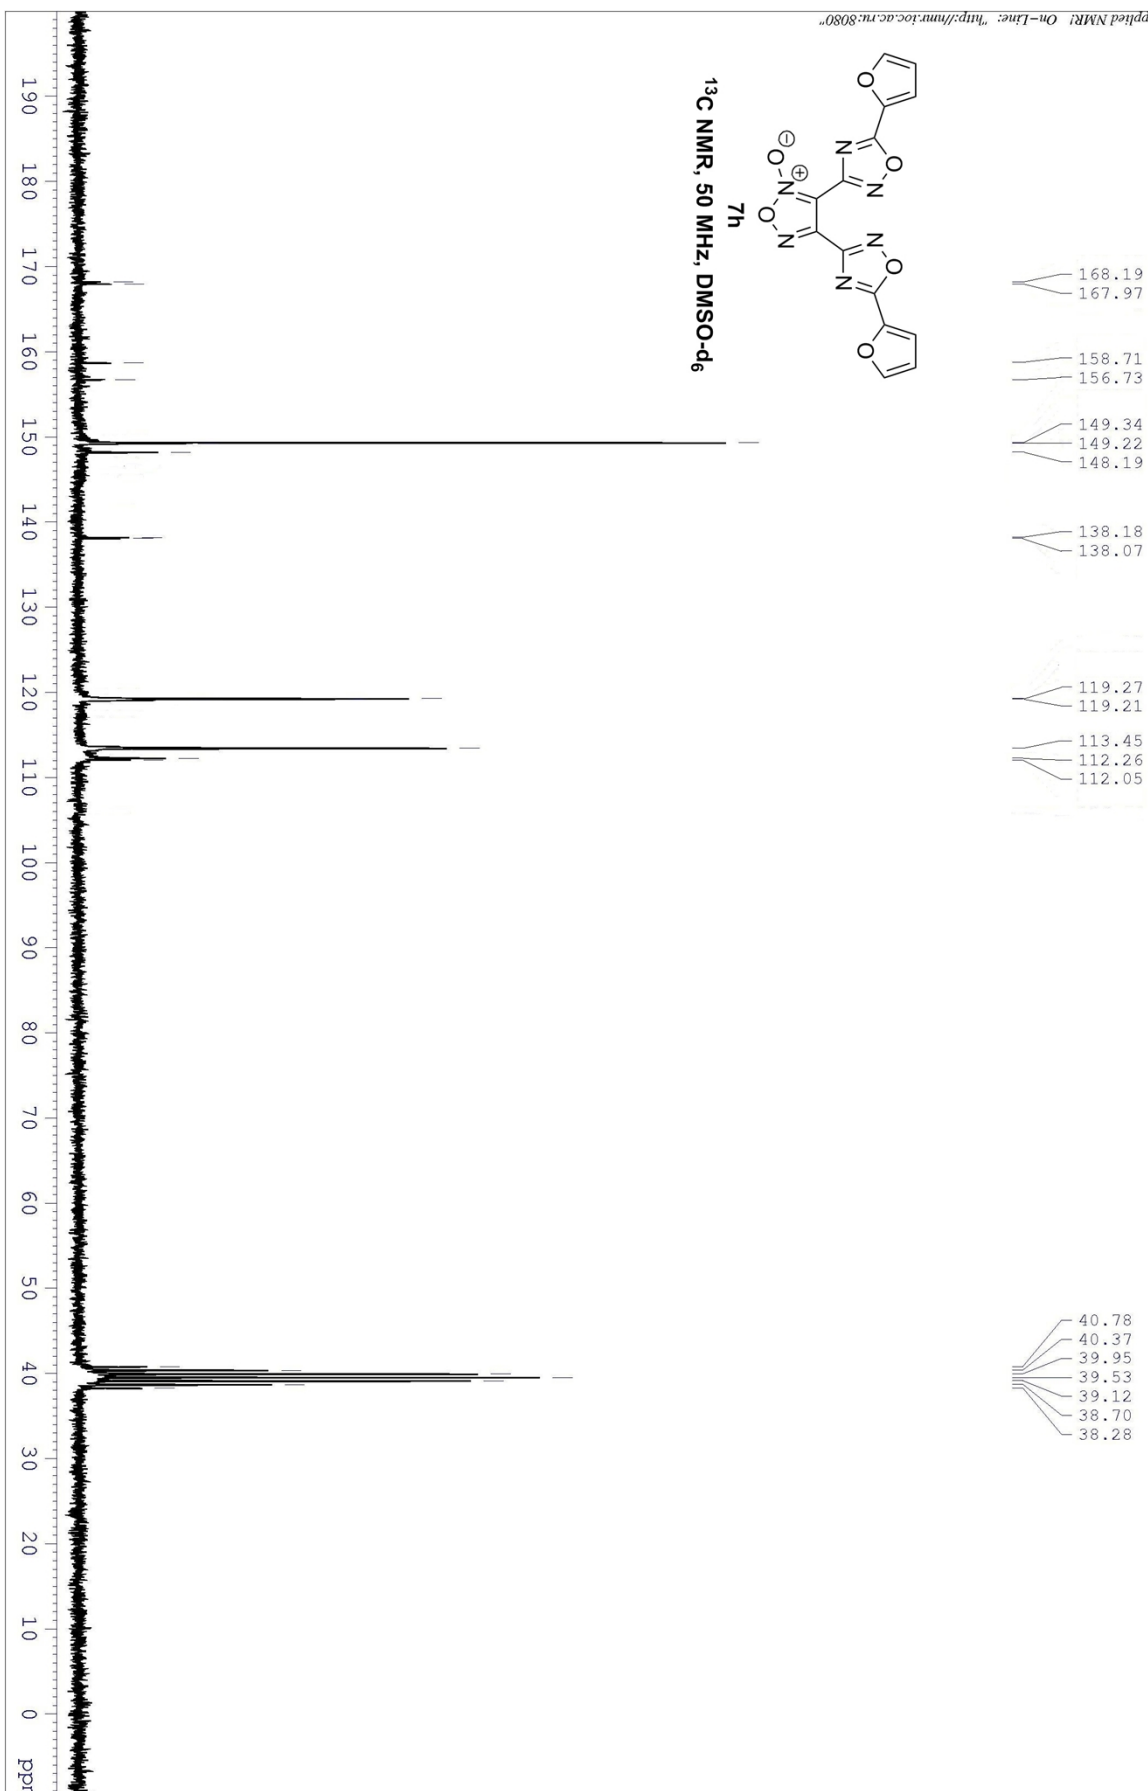

/USED 755

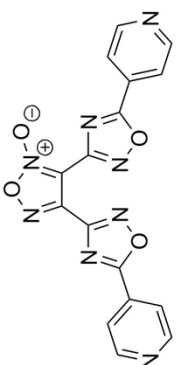

<sup>1</sup>H NMR, 200 MHz, DMSO-d<sub>6</sub>

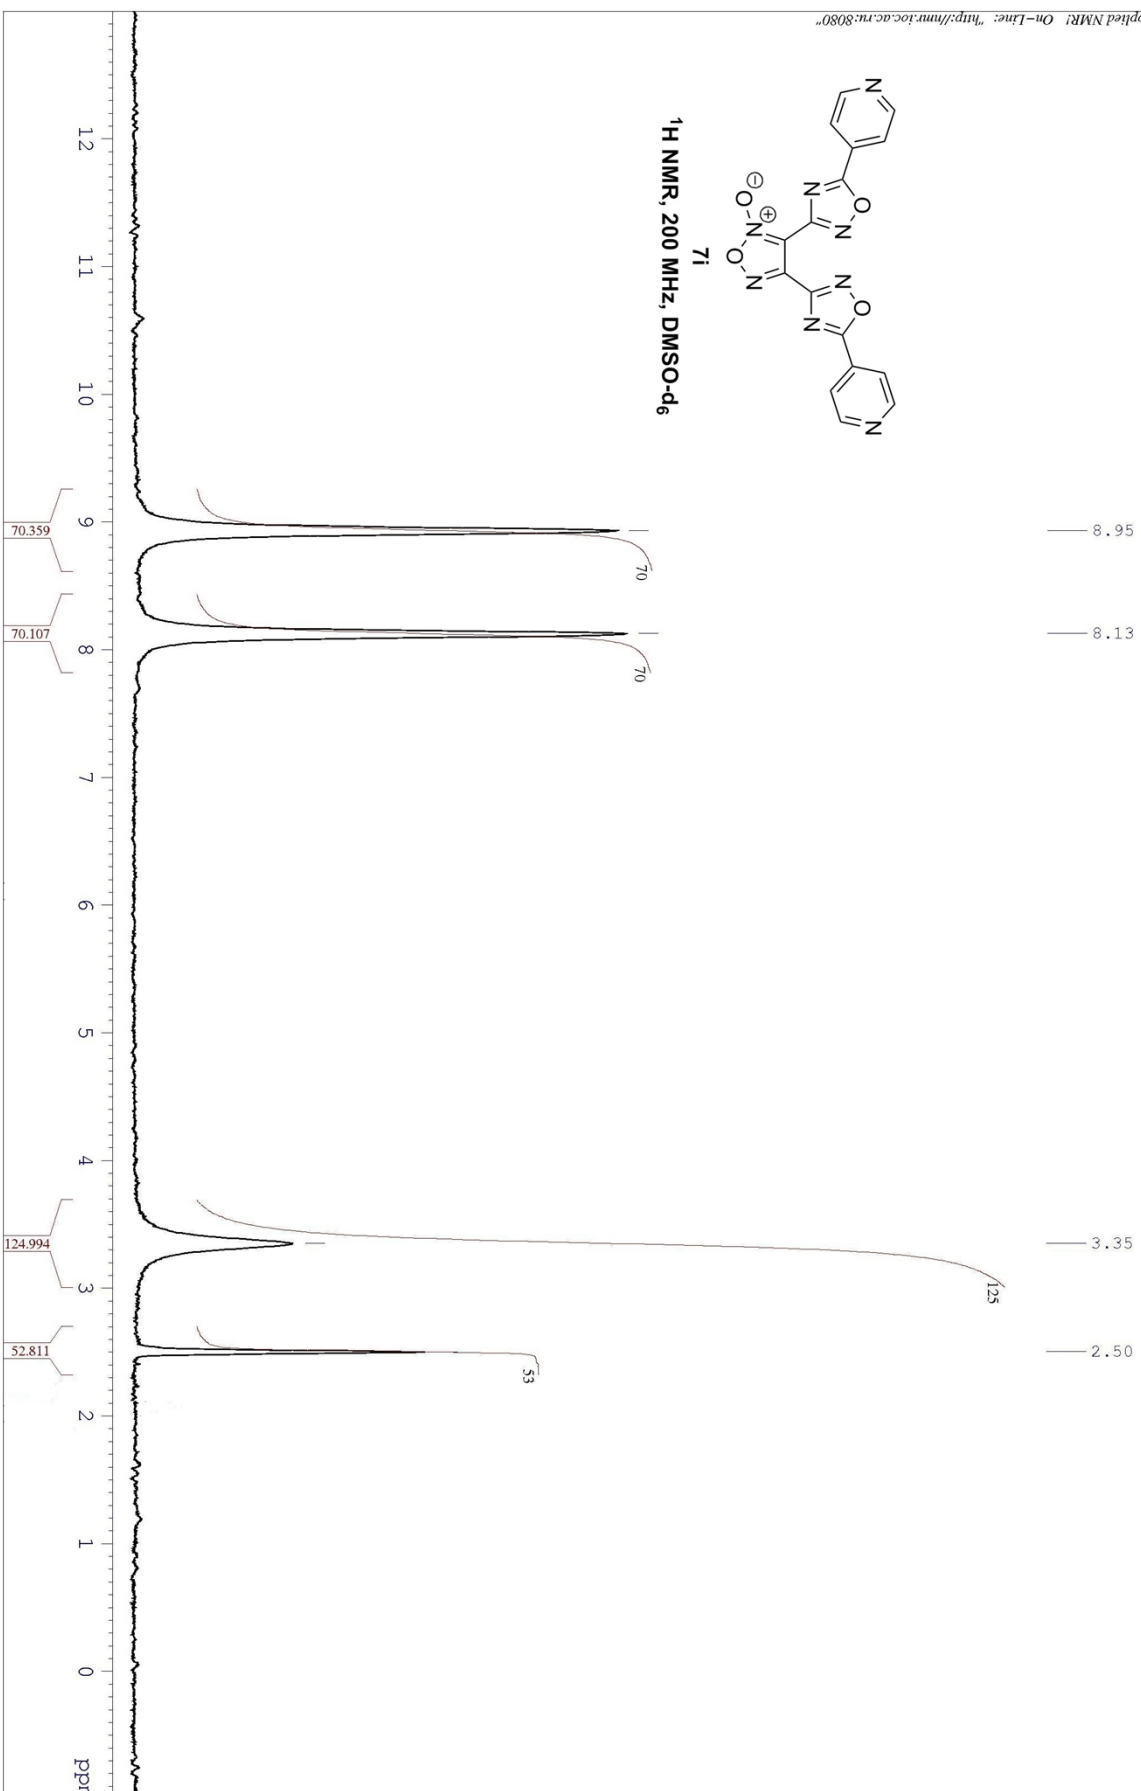



/USED 795

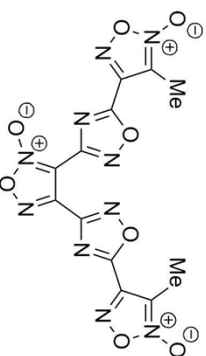

**7k**  
<sup>1</sup>H NMR, 300 MHz, DMSO-d<sub>6</sub>

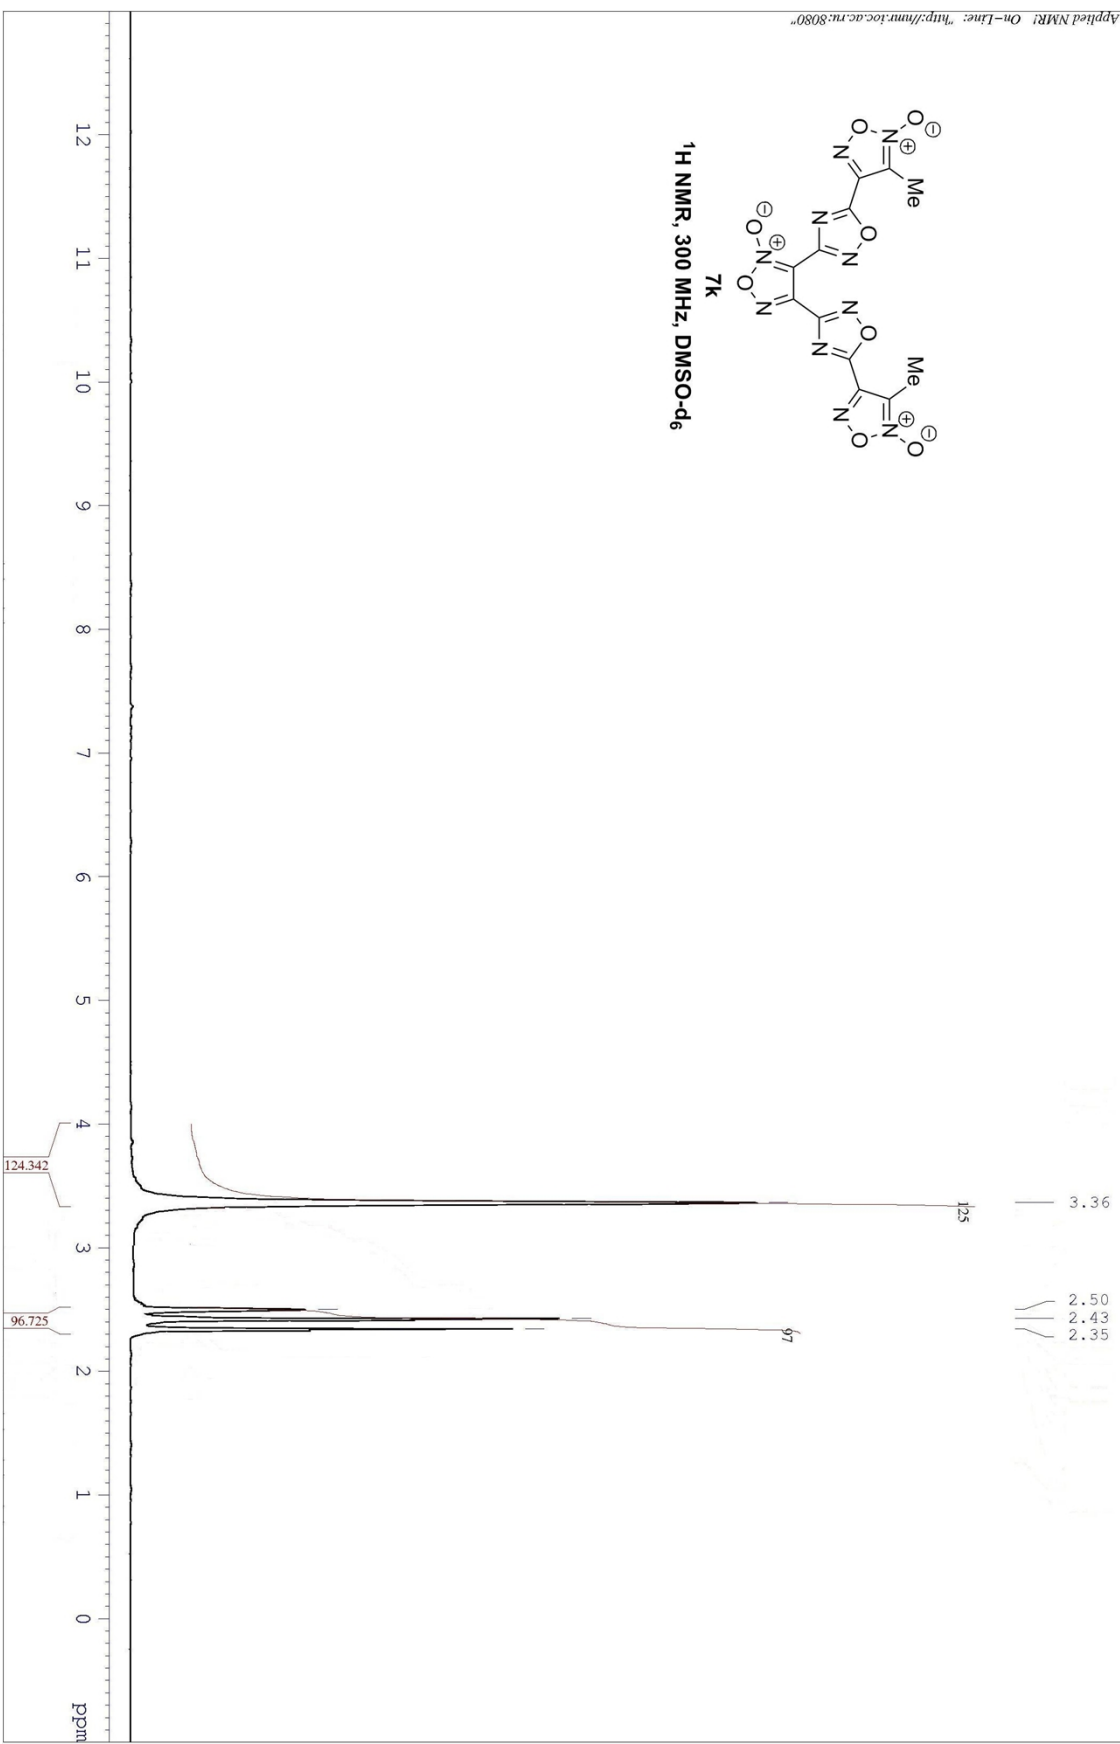

/USED 795.c13

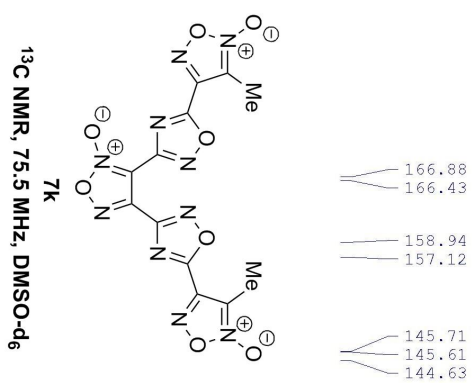

166.88  
166.43

158.94  
157.12

145.71  
145.61  
144.63

112.40  
112.37  
109.25

40.30  
40.02  
39.74  
39.61  
39.47  
39.19  
39.05  
38.91  
38.78  
38.63  
38.17

8.48  
8.32

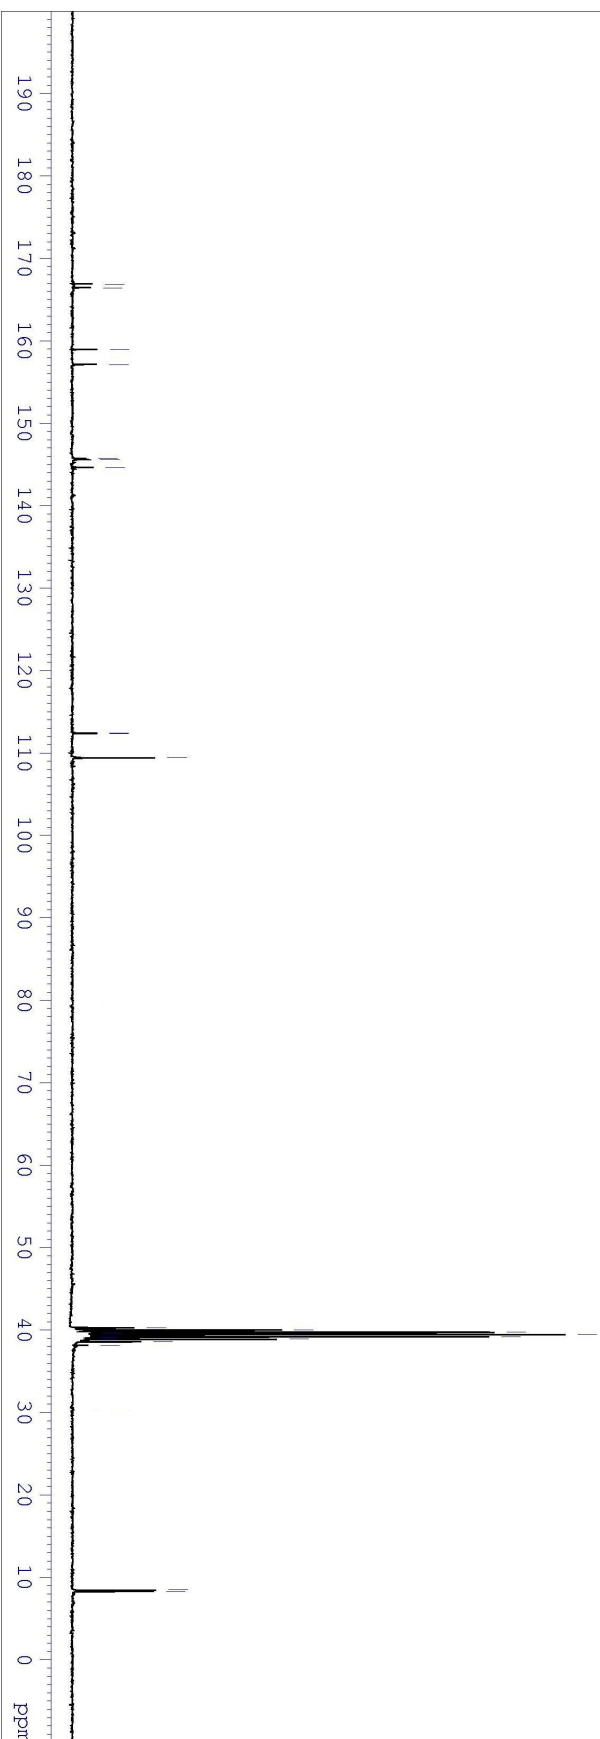

Supplement: c5ra07295f1.pdf [file c5ra07295f1.pdf]
